# Supplementary material for: Genome of the small hive beetle (Aethina tumida, Coleoptera: Nitidulidae), a worldwide parasite of social bee colonies, provides insights into detoxification and herbivory
Source: PubMed Central journal article supplement (PMC6302959; doi:10.1093/gigascience/giy138), 2018-12-07
Supplement: giy138_giga-d-18-00144_revision_1_(2).pdf [file giy138_giga-d-18-00144_revision_1_%282%29.pdf]

# GigaScience

## Genome of the small hive beetle (*Aethina tumida*, Coleoptera: Nitidulidae), a worldwide parasite of social bee colonies, provides insights into detoxification and herbivory --Manuscript Draft--

|                                                      |                                                                                                                                                                                                                                                                                                                                                                                                                                                                                                                                                                                                                                                                                                                                                                                                                                                                                                                                                                                                                                                                                                                                                                                                                                                                                                                                                                                                                                                                                                                                                                                                                                                                                                                                                                                                                                                    |
|------------------------------------------------------|----------------------------------------------------------------------------------------------------------------------------------------------------------------------------------------------------------------------------------------------------------------------------------------------------------------------------------------------------------------------------------------------------------------------------------------------------------------------------------------------------------------------------------------------------------------------------------------------------------------------------------------------------------------------------------------------------------------------------------------------------------------------------------------------------------------------------------------------------------------------------------------------------------------------------------------------------------------------------------------------------------------------------------------------------------------------------------------------------------------------------------------------------------------------------------------------------------------------------------------------------------------------------------------------------------------------------------------------------------------------------------------------------------------------------------------------------------------------------------------------------------------------------------------------------------------------------------------------------------------------------------------------------------------------------------------------------------------------------------------------------------------------------------------------------------------------------------------------------|
| <b>Manuscript Number:</b>                            | GIGA-D-18-00144R1                                                                                                                                                                                                                                                                                                                                                                                                                                                                                                                                                                                                                                                                                                                                                                                                                                                                                                                                                                                                                                                                                                                                                                                                                                                                                                                                                                                                                                                                                                                                                                                                                                                                                                                                                                                                                                  |
| <b>Full Title:</b>                                   | Genome of the small hive beetle ( <i>Aethina tumida</i> , Coleoptera: Nitidulidae), a worldwide parasite of social bee colonies, provides insights into detoxification and herbivory                                                                                                                                                                                                                                                                                                                                                                                                                                                                                                                                                                                                                                                                                                                                                                                                                                                                                                                                                                                                                                                                                                                                                                                                                                                                                                                                                                                                                                                                                                                                                                                                                                                               |
| <b>Article Type:</b>                                 | Research                                                                                                                                                                                                                                                                                                                                                                                                                                                                                                                                                                                                                                                                                                                                                                                                                                                                                                                                                                                                                                                                                                                                                                                                                                                                                                                                                                                                                                                                                                                                                                                                                                                                                                                                                                                                                                           |
| <b>Funding Information:</b>                          |                                                                                                                                                                                                                                                                                                                                                                                                                                                                                                                                                                                                                                                                                                                                                                                                                                                                                                                                                                                                                                                                                                                                                                                                                                                                                                                                                                                                                                                                                                                                                                                                                                                                                                                                                                                                                                                    |
| <b>Abstract:</b>                                     | <p><b>Background:</b> The small hive beetle (<i>Aethina tumida</i>, ATUMI) is an invasive parasite of bee colonies. ATUMI feeds on both fruits and bee nest products, facilitating its spread and increasing its impact on honey bees and other pollinators. We have sequenced and annotated the ATUMI genome, providing the first genomic resources for this species and for the Nitidulidae, a beetle family that is closely related to the extraordinarily species-rich clade of beetles known as the Phytophaga. ATUMI thus provides a contrasting view as a neighbor for one of the most successful known animal groups.</p> <p><b>Results:</b> The ATUMI genome encodes fewer enzymes for plant digestion than the genomes of wood-feeding beetles, but nonetheless shows signs of broad metabolic plasticity. Gustatory receptors are few in number compared to other beetles, especially receptors with known sensitivity (in other beetles) to bitter substances. In contrast, several gene families implicated in detoxification of insecticides and adaptation to diverse dietary resources show increased copy numbers. The presence and diversity of homologs involved in detoxification differs substantially from the bee hosts of ATUMI.</p> <p><b>Conclusions:</b> Our results provide new insights into the genomic basis for local adaption and invasiveness in ATUMI, and a blueprint for control strategies that target this pest without harming their honey bee hosts. A minimal set of gustatory receptors is consistent with the observation that, once a host colony is invaded, food resources are predictable. Unique detoxification pathways and pathway members can help identify which treatments might control this species even in the presence of honey bees, which are notoriously sensitive to pesticides.</p> |
| <b>Corresponding Author:</b>                         | Jay D Evans, PhD<br>USDA Agricultural Research Service<br>Beltsville, MD UNITED STATES                                                                                                                                                                                                                                                                                                                                                                                                                                                                                                                                                                                                                                                                                                                                                                                                                                                                                                                                                                                                                                                                                                                                                                                                                                                                                                                                                                                                                                                                                                                                                                                                                                                                                                                                                             |
| <b>Corresponding Author Secondary Information:</b>   |                                                                                                                                                                                                                                                                                                                                                                                                                                                                                                                                                                                                                                                                                                                                                                                                                                                                                                                                                                                                                                                                                                                                                                                                                                                                                                                                                                                                                                                                                                                                                                                                                                                                                                                                                                                                                                                    |
| <b>Corresponding Author's Institution:</b>           | USDA Agricultural Research Service                                                                                                                                                                                                                                                                                                                                                                                                                                                                                                                                                                                                                                                                                                                                                                                                                                                                                                                                                                                                                                                                                                                                                                                                                                                                                                                                                                                                                                                                                                                                                                                                                                                                                                                                                                                                                 |
| <b>Corresponding Author's Secondary Institution:</b> |                                                                                                                                                                                                                                                                                                                                                                                                                                                                                                                                                                                                                                                                                                                                                                                                                                                                                                                                                                                                                                                                                                                                                                                                                                                                                                                                                                                                                                                                                                                                                                                                                                                                                                                                                                                                                                                    |
| <b>First Author:</b>                                 | Jay D Evans, PhD                                                                                                                                                                                                                                                                                                                                                                                                                                                                                                                                                                                                                                                                                                                                                                                                                                                                                                                                                                                                                                                                                                                                                                                                                                                                                                                                                                                                                                                                                                                                                                                                                                                                                                                                                                                                                                   |
| <b>First Author Secondary Information:</b>           |                                                                                                                                                                                                                                                                                                                                                                                                                                                                                                                                                                                                                                                                                                                                                                                                                                                                                                                                                                                                                                                                                                                                                                                                                                                                                                                                                                                                                                                                                                                                                                                                                                                                                                                                                                                                                                                    |
| <b>Order of Authors:</b>                             | Jay D Evans, PhD                                                                                                                                                                                                                                                                                                                                                                                                                                                                                                                                                                                                                                                                                                                                                                                                                                                                                                                                                                                                                                                                                                                                                                                                                                                                                                                                                                                                                                                                                                                                                                                                                                                                                                                                                                                                                                   |
|                                                      | Duane D McKenna, PhD                                                                                                                                                                                                                                                                                                                                                                                                                                                                                                                                                                                                                                                                                                                                                                                                                                                                                                                                                                                                                                                                                                                                                                                                                                                                                                                                                                                                                                                                                                                                                                                                                                                                                                                                                                                                                               |
|                                                      | Erin D Scully                                                                                                                                                                                                                                                                                                                                                                                                                                                                                                                                                                                                                                                                                                                                                                                                                                                                                                                                                                                                                                                                                                                                                                                                                                                                                                                                                                                                                                                                                                                                                                                                                                                                                                                                                                                                                                      |
|                                                      | Steven C Cook                                                                                                                                                                                                                                                                                                                                                                                                                                                                                                                                                                                                                                                                                                                                                                                                                                                                                                                                                                                                                                                                                                                                                                                                                                                                                                                                                                                                                                                                                                                                                                                                                                                                                                                                                                                                                                      |
|                                                      | Benjamin Dainat                                                                                                                                                                                                                                                                                                                                                                                                                                                                                                                                                                                                                                                                                                                                                                                                                                                                                                                                                                                                                                                                                                                                                                                                                                                                                                                                                                                                                                                                                                                                                                                                                                                                                                                                                                                                                                    |
|                                                      | Noble Egekwu                                                                                                                                                                                                                                                                                                                                                                                                                                                                                                                                                                                                                                                                                                                                                                                                                                                                                                                                                                                                                                                                                                                                                                                                                                                                                                                                                                                                                                                                                                                                                                                                                                                                                                                                                                                                                                       |
|                                                      | Nathaniel Grubbs                                                                                                                                                                                                                                                                                                                                                                                                                                                                                                                                                                                                                                                                                                                                                                                                                                                                                                                                                                                                                                                                                                                                                                                                                                                                                                                                                                                                                                                                                                                                                                                                                                                                                                                                                                                                                                   |
|                                                      | Dawn Lopez                                                                                                                                                                                                                                                                                                                                                                                                                                                                                                                                                                                                                                                                                                                                                                                                                                                                                                                                                                                                                                                                                                                                                                                                                                                                                                                                                                                                                                                                                                                                                                                                                                                                                                                                                                                                                                         |
|                                                      |                                                                                                                                                                                                                                                                                                                                                                                                                                                                                                                                                                                                                                                                                                                                                                                                                                                                                                                                                                                                                                                                                                                                                                                                                                                                                                                                                                                                                                                                                                                                                                                                                                                                                                                                                                                                                                                    |

|                                                |                                                                                                                                                                                                                                                                                                                                                                                                                                                                                                                                                                                                                                                                                                                                                                                                                                                                                                                                                                                                                                                                                                                                                                                                                                                                                                                                                                                                                                                                                                                                                                                                                                                                                                                                                                                                                                                                                                                                                                                                                                                                                                                                                                                                                                                                                                                                                                                                                                                                                                                                                                                                                                                                                                                                                                                                                                                                                                                                                                                                                                                                                                                                                                                                                                                                                                                                                                                                                                                                       |
|------------------------------------------------|-----------------------------------------------------------------------------------------------------------------------------------------------------------------------------------------------------------------------------------------------------------------------------------------------------------------------------------------------------------------------------------------------------------------------------------------------------------------------------------------------------------------------------------------------------------------------------------------------------------------------------------------------------------------------------------------------------------------------------------------------------------------------------------------------------------------------------------------------------------------------------------------------------------------------------------------------------------------------------------------------------------------------------------------------------------------------------------------------------------------------------------------------------------------------------------------------------------------------------------------------------------------------------------------------------------------------------------------------------------------------------------------------------------------------------------------------------------------------------------------------------------------------------------------------------------------------------------------------------------------------------------------------------------------------------------------------------------------------------------------------------------------------------------------------------------------------------------------------------------------------------------------------------------------------------------------------------------------------------------------------------------------------------------------------------------------------------------------------------------------------------------------------------------------------------------------------------------------------------------------------------------------------------------------------------------------------------------------------------------------------------------------------------------------------------------------------------------------------------------------------------------------------------------------------------------------------------------------------------------------------------------------------------------------------------------------------------------------------------------------------------------------------------------------------------------------------------------------------------------------------------------------------------------------------------------------------------------------------------------------------------------------------------------------------------------------------------------------------------------------------------------------------------------------------------------------------------------------------------------------------------------------------------------------------------------------------------------------------------------------------------------------------------------------------------------------------------------------------|
|                                                | Marce D Lorenzen                                                                                                                                                                                                                                                                                                                                                                                                                                                                                                                                                                                                                                                                                                                                                                                                                                                                                                                                                                                                                                                                                                                                                                                                                                                                                                                                                                                                                                                                                                                                                                                                                                                                                                                                                                                                                                                                                                                                                                                                                                                                                                                                                                                                                                                                                                                                                                                                                                                                                                                                                                                                                                                                                                                                                                                                                                                                                                                                                                                                                                                                                                                                                                                                                                                                                                                                                                                                                                                      |
|                                                | Steven M Reyna                                                                                                                                                                                                                                                                                                                                                                                                                                                                                                                                                                                                                                                                                                                                                                                                                                                                                                                                                                                                                                                                                                                                                                                                                                                                                                                                                                                                                                                                                                                                                                                                                                                                                                                                                                                                                                                                                                                                                                                                                                                                                                                                                                                                                                                                                                                                                                                                                                                                                                                                                                                                                                                                                                                                                                                                                                                                                                                                                                                                                                                                                                                                                                                                                                                                                                                                                                                                                                                        |
|                                                | Frank D Rinkevich                                                                                                                                                                                                                                                                                                                                                                                                                                                                                                                                                                                                                                                                                                                                                                                                                                                                                                                                                                                                                                                                                                                                                                                                                                                                                                                                                                                                                                                                                                                                                                                                                                                                                                                                                                                                                                                                                                                                                                                                                                                                                                                                                                                                                                                                                                                                                                                                                                                                                                                                                                                                                                                                                                                                                                                                                                                                                                                                                                                                                                                                                                                                                                                                                                                                                                                                                                                                                                                     |
|                                                | Peter Neumann                                                                                                                                                                                                                                                                                                                                                                                                                                                                                                                                                                                                                                                                                                                                                                                                                                                                                                                                                                                                                                                                                                                                                                                                                                                                                                                                                                                                                                                                                                                                                                                                                                                                                                                                                                                                                                                                                                                                                                                                                                                                                                                                                                                                                                                                                                                                                                                                                                                                                                                                                                                                                                                                                                                                                                                                                                                                                                                                                                                                                                                                                                                                                                                                                                                                                                                                                                                                                                                         |
|                                                | Qiang Huang                                                                                                                                                                                                                                                                                                                                                                                                                                                                                                                                                                                                                                                                                                                                                                                                                                                                                                                                                                                                                                                                                                                                                                                                                                                                                                                                                                                                                                                                                                                                                                                                                                                                                                                                                                                                                                                                                                                                                                                                                                                                                                                                                                                                                                                                                                                                                                                                                                                                                                                                                                                                                                                                                                                                                                                                                                                                                                                                                                                                                                                                                                                                                                                                                                                                                                                                                                                                                                                           |
| <b>Order of Authors Secondary Information:</b> |                                                                                                                                                                                                                                                                                                                                                                                                                                                                                                                                                                                                                                                                                                                                                                                                                                                                                                                                                                                                                                                                                                                                                                                                                                                                                                                                                                                                                                                                                                                                                                                                                                                                                                                                                                                                                                                                                                                                                                                                                                                                                                                                                                                                                                                                                                                                                                                                                                                                                                                                                                                                                                                                                                                                                                                                                                                                                                                                                                                                                                                                                                                                                                                                                                                                                                                                                                                                                                                                       |
| <b>Response to Reviewers:</b>                  | <p>Reviewer #1: Positive Comments</p> <p>This looks like a professionally assembled and annotated genome. It fills in an important blank space within the genomic resources of beetles.</p> <p>Thank you!</p> <p>Major Comments</p> <p>1. At is not "basal" to anything. It can help you infer what the LCA might have looked like, but it has had an equal amount of evolution compared with Phytophaga.</p> <p>Response: We clarify in this abstract passage that Aethina and the nitidulids diverged basally to what are now Phytophaga by saying that this resource provides the closest available outgroup to the highly successful Phytophaga. Specifically "ATUMI thus provides a contrasting view as a neighbor for one of the most successful known animal groups"</p> <p>2. No evidence is given for metabolic plasticity, just increased copy number of some metabolic genes. Not the same thing.</p> <p>While we are convinced that gene-family diversity generally leads to flexibility and novel functions in these groups it is true we have not proven this in ATUMI, and we have dropped that speculation from the abstract. We have left discussion of predicted function for specific orthologs in some gene families since these are secure across the insects for which functional analyses are possible. ATUMI is not as conducive to RNAi interference functional knockdowns as other beetles (i.e., such knockdowns are not generally systemic) but we hope these targets will lead to direct tests of function via lack-of-function RNAi assays</p> <p>3. Why so few shared ortho-groups? Even restricted to SC BUSCO genes, I would still expect several hundred. Dm has the lowest # of SC at ~1050, but only a 1/5 are SC across all species. Seems odd given BUSCO is SC and complete in 90% of species with the clade of interest, by definition. Just struck me as especially low.</p> <p>Response: As each species was added to the BUSCO, the shared single-copy genes were decreased. This reflects singular gene loss in some lineages and also weaknesses/omissions in the public gene sets of other species. Our dataset includes 11 species ranging from Hymenoptera (ants, wasps, and bees), to Coleoptera (beetles) and Diptera (flies), it is then not surprising to find a low number of shared SC BUSCO genes. The phylogenetic tree we generated based on shared SC BUSCO alignments is consistent with previous published trees, which suggests the accurate assignment of SC BUSCO genes.</p> <p>4. Loss and duplication of core genes from small hive beetle genome section. This seems like a lot to read into the lack of something. Only 11 species were analyzed. Either I missed what is being said or this is a sweeping analysis of very few "samples."</p> <p>Response: this is a follow up analysis to the duplicated and missing BUSCO genes. First, we found 337 BUSCO genes were lost from at least two beetle species. Secondly, we mapped these 337 BUSCO genes to the Pfam database. We also mapped the total 2442 BUSCO genes to Pfam database. By analyzing the distribution of function domains between the 337 genes and 2442 genes, no significantly difference was found. But methyltransferase (MT), glycosyltransferase (GT), beta-transducin repeats (WD) and zinc finger (ZF) showed high counts from the 337 BUSCO genes. Thirdly, we calculated the average duplication evens per BUSCO</p> |

genes using the equation (total number of duplication events) / (duplicated BUSCO genes). We found a significantly positive correlation between the average duplication events per gene and the number of duplicated BUSCO genes. This result suggests that BUSCO is accurately identifying gene families which shows especially labile gene/protein counts, and hence are candidates for lineage-specific novel functions.

5. GH's, Gr's, Nav's, Ace's, GST's, CP450's, etc sections. They are full of a huge amount of information that is not useful to the central message of the sections. Lots of speculation without that leading to specific hypotheses or broader meaning. It was not clear to me why every observed pattern was explained in such detail. Three examples: Line 265-274 can be deleted without any meaning being lost. Much of the information in the opening paragraphs of each sections are not revisited or used in further paragraphs. Line 346, why would that be informative? Not saying it would not be, but I see no particular reason that it would be. Line 453 paragraph, so much to read into so little evidence, only two of the analyzed species were non-beetles.

Thank you for this suggestion, which is valid, we were perhaps overly excited about some of these shifts, and time plus functional evidence will tell whether the predicted changes in function are real. We have reduced all of the gene family vignettes to what we hope are arguments most relevant to this species and its possible control with novel insecticides. Each section was reduced, on average, by one third, and we have in the end trimmed 25 references that were less essential for the arguments that remain. The strong focus on detoxification enzymes came in part from the reality that any steps chosen to control these beetles will be hampered by off-target effects on their sensitive hosts (honey bees), so we are posing possible weak points in the beetle. This information, we expect, will help chemists who are currently designing new controls for ATUMI.

#### Minor Comments

Abstract. The results have nothing to do with what is discussed with the background section.

We have changed this a bit by omitting comments that are not a focus of the current analysis

Abstract. The reader should be given some indication of gene complement completeness before the manuscript speaks about gene copy numbers.

Thank you, we have added our BUSCO/completeness parameters as part of the abstract, we feel the captured genes in this analysis are complete and allow for the arguments for gene loss, duplication, etc.

Line 59. Awkward sentence about behaviour.  
This was changed.

Line 78. Unclear why this paragraph is sandwiched in between two At life history paragraphs.  
We have shifted this big-picture paragraph to follow the (much-shortened) review of ATUMI biology.

Line 107. Endnote field code errors. And a few other places throughout.  
fixed

Line 107. Genera should be completely spelled out if it is the first word of a sentence.  
in the end we have deleted the discussion of Kodamaea fungi.

Line 113. 343.3 million base pairs is not the number given in Table 1.  
this has been corrected, the Table is correct

Line 124 How was DNA extracted? Just realized this is not the methods section.  
Possibly tell reader details can be found below?

This has been in the supplements and is now given in the methods section lines 410+

Line 142. Why was such as old tool, TopHat2, used? There is a whole generation of better tools; HISAT2, STAR, GSNAP (the updated version). TopHat2 consistently underperforms other tools, especially with default parameters (Baruzzo et al., 2017, Nature Methods).

Response: Thank you for encouraging this. we re-analyzed the expressed protein coding genes using Hisat2. The mapped mRNA increased from 99.63% to 99.73%. the mapped protein coding genes increased from 99.56% to 99.65%.

Line 150. "The size of the ATUMI genome assembly is similar to that of the red flour beetle (165.9 Mbp)." Your assemble is over double that, reported as 343 Mb.

Response: The actual assembly was only 234 MBp, and this section has been corrected. The sentence has been revised as "The size of the ATUMI genome assembly is larger than the red flour beetle (165.9 Mbp), but much smaller than the more derived Asian longhorn beetle (707.7 Mbp)".

Line 164. 2444 needs a comma to be consistent with other number in manuscript.  
fixed

Line 202. Recalcitrance. Great word.  
Thank you

Line 564. I assume default parameters were used with all programs when not stated. Nice thing to say to remove doubt for all software used.

Response: the parameters have now been added.

Figure 6 legend. In the title, ATUMI is not bolded.  
fixed

Reviewer #2: Evans et al., sequenced and assembled a draft genome of small hive beetle and analyzed some gene families based on this genome assembly. This is a very primary work in the filed of genome analysis. I suggested more comparative genomics analysis should be carried out. This manuscript, at its present status, is below the merit of other papers in Gigascience.

Major concerns,

1. The detail procedures of genome sequencing (illumina and PacBio) and genome assembly should be given in detail. How many individuals used for illumina sequencing and how many for PacBio sequencing.

Response: This was an inadvertent omission from the main text, more complete details of both the collections and the DNA extraction methods are now provided, and are also available along with GFF files and fasta files for the assembly and features in the background information for reviewers, thank you.

2. The methods (software and their parameters) of genome assembly should be given in detail

Response: the parameters have all been included now. Additionally, the detailed codes for the assembly have been uploaded as supplemental data for the reviewers.

3. The authors just mentioned that the genome annotation is carried out using NCBI eukaryotic annotation pipeline but without any detail information. This makes the work is hard to be followed.

A more complete citation to the pipeline as well as specific databases and annotations used the infer this gene set are now cited. The NCBI gene set reflects a balancing of assembly and transcript-based evidence with the resources available at NCBI for comparative genomics. This pipeline has proved more effective than in-house pipelines for generating insect gene sets and features.

4. P2 Line 38-40 Conclusion in the abstract. No evidence to support these

|                                                                                                                                                                                                                                   |                                                                                                                                                                                                                                                                                                                                                                                                                                                                                                                                                                                                                                                                                                                                                                                                                                                                                                                                                                                                                                                                                                                                                                                                                                                                                                                                                                                                                                                                                                                                                                                                                                                                                                                                                                                                                                                                                                                                                                                                                                                                                                                                                                                                                                                                                                                                                                                                                                                                               |
|-----------------------------------------------------------------------------------------------------------------------------------------------------------------------------------------------------------------------------------|-------------------------------------------------------------------------------------------------------------------------------------------------------------------------------------------------------------------------------------------------------------------------------------------------------------------------------------------------------------------------------------------------------------------------------------------------------------------------------------------------------------------------------------------------------------------------------------------------------------------------------------------------------------------------------------------------------------------------------------------------------------------------------------------------------------------------------------------------------------------------------------------------------------------------------------------------------------------------------------------------------------------------------------------------------------------------------------------------------------------------------------------------------------------------------------------------------------------------------------------------------------------------------------------------------------------------------------------------------------------------------------------------------------------------------------------------------------------------------------------------------------------------------------------------------------------------------------------------------------------------------------------------------------------------------------------------------------------------------------------------------------------------------------------------------------------------------------------------------------------------------------------------------------------------------------------------------------------------------------------------------------------------------------------------------------------------------------------------------------------------------------------------------------------------------------------------------------------------------------------------------------------------------------------------------------------------------------------------------------------------------------------------------------------------------------------------------------------------------|
|                                                                                                                                                                                                                                   | <p>conclusions. I do not think the author can get any in-depth conclusion based on present analysis.<br/>This statement has been removed</p> <p>5. Without Treefam or CAFE analysis, please do not make any conclusions just based on the changes of gene numbers.<br/>We have not confirmed the birth and death of paralogs using CAFÉ, in part because this is the first species in it's clade just outside the phytophaga. As more genomes become available for the beetles it will be possible to confirm birth and loss of paralogs.</p> <p>Minor Concerns,</p> <p>1. The abbreviations in this manuscript are not standard. It is hard to follow the used abbreviations, such as ATUMI, TTCAST. Please use either English name or Latin name instead.</p> <p>This naming scheme has been adopted for gene sets in the insects and likely other eukaryotes in the OrthoDb comparative genomics tables and as a precursor to official gene sets. It seemed awkward to some of us as well, but in the end it is the most even and consistent way to separate the proteins of different species, since a fixed 4-character name is easier to parse out than a variety of common names or species-level names.</p> <p>2. GH for Glycoside hydrolyses whereas Grs for Gustatory receptors. Please use uniformed abbreviations</p> <p>We have capitalized both</p> <p>3. For each gene families, especially for Gustatory Receptors, the authors used too many sentences (for GPCR,s they used one and a half page) to introduce the gene families. However, only several sentences were given to the data in this beetle. This should be revised before it is submitted again.</p> <p>These sections have been trimmed substantially.</p> <p>4. The structure of this manuscript is strange. it has sections of "data description" and "Implicatoins". What is the difference between data description and "material and methods". And what is the difference between "implication" and Discussion.</p> <p>We have reformatted the sections</p> <p>5. Most words in the section of methods (especially for gene families analysis) are repeats of results. It is unnecessary to repeat each gene family again in the methods. Please summarize the methods.</p> <p>Thank you, we have tried to be more concise in the methods, this was meant to make it clear where decisions were made on family boundaries but we have done our best to reduce redundant descriptions.</p> |
| <b>Additional Information:</b>                                                                                                                                                                                                    |                                                                                                                                                                                                                                                                                                                                                                                                                                                                                                                                                                                                                                                                                                                                                                                                                                                                                                                                                                                                                                                                                                                                                                                                                                                                                                                                                                                                                                                                                                                                                                                                                                                                                                                                                                                                                                                                                                                                                                                                                                                                                                                                                                                                                                                                                                                                                                                                                                                                               |
| <b>Question</b>                                                                                                                                                                                                                   | <b>Response</b>                                                                                                                                                                                                                                                                                                                                                                                                                                                                                                                                                                                                                                                                                                                                                                                                                                                                                                                                                                                                                                                                                                                                                                                                                                                                                                                                                                                                                                                                                                                                                                                                                                                                                                                                                                                                                                                                                                                                                                                                                                                                                                                                                                                                                                                                                                                                                                                                                                                               |
| Are you submitting this manuscript to a special series or article collection?                                                                                                                                                     | No                                                                                                                                                                                                                                                                                                                                                                                                                                                                                                                                                                                                                                                                                                                                                                                                                                                                                                                                                                                                                                                                                                                                                                                                                                                                                                                                                                                                                                                                                                                                                                                                                                                                                                                                                                                                                                                                                                                                                                                                                                                                                                                                                                                                                                                                                                                                                                                                                                                                            |
| <b>Experimental design and statistics</b>                                                                                                                                                                                         | Yes                                                                                                                                                                                                                                                                                                                                                                                                                                                                                                                                                                                                                                                                                                                                                                                                                                                                                                                                                                                                                                                                                                                                                                                                                                                                                                                                                                                                                                                                                                                                                                                                                                                                                                                                                                                                                                                                                                                                                                                                                                                                                                                                                                                                                                                                                                                                                                                                                                                                           |
| Full details of the experimental design and statistical methods used should be given in the Methods section, as detailed in our <a href="#">Minimum Standards Reporting Checklist</a> . Information essential to interpreting the |                                                                                                                                                                                                                                                                                                                                                                                                                                                                                                                                                                                                                                                                                                                                                                                                                                                                                                                                                                                                                                                                                                                                                                                                                                                                                                                                                                                                                                                                                                                                                                                                                                                                                                                                                                                                                                                                                                                                                                                                                                                                                                                                                                                                                                                                                                                                                                                                                                                                               |

|                                                                                                                                                                                                                                                                                                                                                                                                                                                                                                                                                         |            |
|---------------------------------------------------------------------------------------------------------------------------------------------------------------------------------------------------------------------------------------------------------------------------------------------------------------------------------------------------------------------------------------------------------------------------------------------------------------------------------------------------------------------------------------------------------|------------|
| <p>data presented should be made available in the figure legends.</p> <p>Have you included all the information requested in your manuscript?</p>                                                                                                                                                                                                                                                                                                                                                                                                        |            |
| <p><b>Resources</b></p> <p>A description of all resources used, including antibodies, cell lines, animals and software tools, with enough information to allow them to be uniquely identified, should be included in the Methods section. Authors are strongly encouraged to cite <a href="#">Research Resource Identifiers</a> (RRIDs) for antibodies, model organisms and tools, where possible.</p> <p>Have you included the information requested as detailed in our <a href="#">Minimum Standards Reporting Checklist</a>?</p>                     | <p>Yes</p> |
| <p><b>Availability of data and materials</b></p> <p>All datasets and code on which the conclusions of the paper rely must be either included in your submission or deposited in <a href="#">publicly available repositories</a> (where available and ethically appropriate), referencing such data using a unique identifier in the references and in the “Availability of Data and Materials” section of your manuscript.</p> <p>Have you have met the above requirement as detailed in our <a href="#">Minimum Standards Reporting Checklist</a>?</p> | <p>Yes</p> |

[Click here to view linked References](#)

1  
2  
3  
4 **Genome of the small hive beetle (*Aethina tumida*, Coleoptera: Nitidulidae), a**  
5  
6 **worldwide parasite of social bee colonies, provides insights into detoxification and**  
7  
8 **herbivory**  
9

10  
11  
12  
13  
14 Jay D. Evans<sup>1\*</sup>, Duane McKenna<sup>2</sup>, Erin Scully<sup>3</sup>, Steven C. Cook<sup>1</sup>, Benjamin Dainat<sup>4</sup>, Noble  
15  
16 Egekwu<sup>1</sup>, Nathaniel Grubbs<sup>5</sup>, Dawn Lopez<sup>1</sup>, Marcé D. Lorenzen<sup>5</sup>, Steven M. Reyna<sup>5</sup>,  
17  
18 Frank D. Rinkevich<sup>6</sup>, Peter Neumann<sup>7</sup>, Qiang Huang<sup>7,8\*</sup>  
19  
20  
21  
22  
23

24  
25 <sup>1</sup>USDA-ARS, Bee Research Laboratory, BARC-East Building 306, Beltsville, Maryland  
26  
27 20705, USA  
28

29  
30 <sup>2</sup>Department of Biological Sciences, University of Memphis, 3700 Walker Ave.,  
31  
32 Memphis, TN 38152, USA  
33

34  
35 <sup>3</sup>USDA-ARS, Center for Grain and Animal Health, Stored Product Insect and Engineering  
36  
37 Research Unit, Manhattan, KS 66502, USA  
38

39  
40 <sup>4</sup>Agroscope, Swiss Bee Research Center, CH-3003 Bern, Switzerland  
41

42  
43 <sup>5</sup>Department of Entomology and Plant Pathology, North Carolina State University, 1566  
44  
45 Thomas Hall, Raleigh, NC 27695, USA  
46

47  
48 <sup>6</sup>USDA, Honey Bee Breeding, Genetics and Physiology Laboratory, 1157 Ben Hur Road,  
49  
50 Baton Rouge, LA 70820, USA  
51

52  
53 <sup>7</sup>Institute of Bee Health, Vetsuisse Faculty, University of Bern, Schwarzenburgstrasse  
54  
55 161, CH-3097, Liebefeld, Switzerland  
56  
57  
58  
59  
60  
61

1  
2  
3  
4<sup>8</sup>Honey Bee Research Institute, Jiangxi Agricultural University, Zhimin Avenue 1101,  
5  
6  
7 330045 Nanchang, China  
8  
9

10  
11  
12 \* For correspondence  
13

14 Email: Jay.Evans@ARS.USDA.GOV (JDE); qiang-huang@live.com (QH)  
15  
16  
17  
18  
19

## 20 **Abstract**

21  
22 **Background:** The small hive beetle (*Aethina tumida*, ATUMI) is an invasive parasite of  
23  
24  
25  
26  
27  
28  
29  
30  
31  
32  
33  
34  
35  
36  
37  
38  
39  
40  
41  
42  
43  
44  
45  
46  
47  
48  
49  
50  
51  
52  
53  
54  
55  
56  
57  
58  
59  
60  
61  
62  
63  
64  
65  
66  
67  
68  
69  
70  
71  
72  
73  
74  
75  
76  
77  
78  
79  
80  
81  
82  
83  
84  
85  
86  
87  
88  
89  
90  
91  
92  
93  
94  
95  
96  
97  
98  
99  
100  
101  
102  
103  
104  
105  
106  
107  
108  
109  
110  
111  
112  
113  
114  
115  
116  
117  
118  
119  
120  
121  
122  
123  
124  
125  
126  
127  
128  
129  
130  
131  
132  
133  
134  
135  
136  
137  
138  
139  
140  
141  
142  
143  
144  
145  
146  
147  
148  
149  
150  
151  
152  
153  
154  
155  
156  
157  
158  
159  
160  
161  
162  
163  
164  
165  
166  
167  
168  
169  
170  
171  
172  
173  
174  
175  
176  
177  
178  
179  
180  
181  
182  
183  
184  
185  
186  
187  
188  
189  
190  
191  
192  
193  
194  
195  
196  
197  
198  
199  
200  
201  
202  
203  
204  
205  
206  
207  
208  
209  
210  
211  
212  
213  
214  
215  
216  
217  
218  
219  
220  
221  
222  
223  
224  
225  
226  
227  
228  
229  
230  
231  
232  
233  
234  
235  
236  
237  
238  
239  
240  
241  
242  
243  
244  
245  
246  
247  
248  
249  
250  
251  
252  
253  
254  
255  
256  
257  
258  
259  
260  
261  
262  
263  
264  
265  
266  
267  
268  
269  
270  
271  
272  
273  
274  
275  
276  
277  
278  
279  
280  
281  
282  
283  
284  
285  
286  
287  
288  
289  
290  
291  
292  
293  
294  
295  
296  
297  
298  
299  
300  
301  
302  
303  
304  
305  
306  
307  
308  
309  
310  
311  
312  
313  
314  
315  
316  
317  
318  
319  
320  
321  
322  
323  
324  
325  
326  
327  
328  
329  
330  
331  
332  
333  
334  
335  
336  
337  
338  
339  
340  
341  
342  
343  
344  
345  
346  
347  
348  
349  
350  
351  
352  
353  
354  
355  
356  
357  
358  
359  
360  
361  
362  
363  
364  
365  
366  
367  
368  
369  
370  
371  
372  
373  
374  
375  
376  
377  
378  
379  
380  
381  
382  
383  
384  
385  
386  
387  
388  
389  
390  
391  
392  
393  
394  
395  
396  
397  
398  
399  
400  
401  
402  
403  
404  
405  
406  
407  
408  
409  
410  
411  
412  
413  
414  
415  
416  
417  
418  
419  
420  
421  
422  
423  
424  
425  
426  
427  
428  
429  
430  
431  
432  
433  
434  
435  
436  
437  
438  
439  
440  
441  
442  
443  
444  
445  
446  
447  
448  
449  
450  
451  
452  
453  
454  
455  
456  
457  
458  
459  
460  
461  
462  
463  
464  
465  
466  
467  
468  
469  
470  
471  
472  
473  
474  
475  
476  
477  
478  
479  
480  
481  
482  
483  
484  
485  
486  
487  
488  
489  
490  
491  
492  
493  
494  
495  
496  
497  
498  
499  
500  
501  
502  
503  
504  
505  
506  
507  
508  
509  
510  
511  
512  
513  
514  
515  
516  
517  
518  
519  
520  
521  
522  
523  
524  
525  
526  
527  
528  
529  
530  
531  
532  
533  
534  
535  
536  
537  
538  
539  
540  
541  
542  
543  
544  
545  
546  
547  
548  
549  
550  
551  
552  
553  
554  
555  
556  
557  
558  
559  
560  
561  
562  
563  
564  
565  
566  
567  
568  
569  
570  
571  
572  
573  
574  
575  
576  
577  
578  
579  
580  
581  
582  
583  
584  
585  
586  
587  
588  
589  
590  
591  
592  
593  
594  
595  
596  
597  
598  
599  
600  
601  
602  
603  
604  
605  
606  
607  
608  
609  
610  
611  
612  
613  
614  
615  
616  
617  
618  
619  
620  
621  
622  
623  
624  
625  
626  
627  
628  
629  
630  
631  
632  
633  
634  
635  
636  
637  
638  
639  
640  
641  
642  
643  
644  
645  
646  
647  
648  
649  
650  
651  
652  
653  
654  
655  
656  
657  
658  
659  
660  
661  
662  
663  
664  
665  
666  
667  
668  
669  
670  
671  
672  
673  
674  
675  
676  
677  
678  
679  
680  
681  
682  
683  
684  
685  
686  
687  
688  
689  
690  
691  
692  
693  
694  
695  
696  
697  
698  
699  
700  
701  
702  
703  
704  
705  
706  
707  
708  
709  
710  
711  
712  
713  
714  
715  
716  
717  
718  
719  
720  
721  
722  
723  
724  
725  
726  
727  
728  
729  
730  
731  
732  
733  
734  
735  
736  
737  
738  
739  
740  
741  
742  
743  
744  
745  
746  
747  
748  
749  
750  
751  
752  
753  
754  
755  
756  
757  
758  
759  
760  
761  
762  
763  
764  
765  
766  
767  
768  
769  
770  
771  
772  
773  
774  
775  
776  
777  
778  
779  
780  
781  
782  
783  
784  
785  
786  
787  
788  
789  
790  
791  
792  
793  
794  
795  
796  
797  
798  
799  
800  
801  
802  
803  
804  
805  
806  
807  
808  
809  
810  
811  
812  
813  
814  
815  
816  
817  
818  
819  
820  
821  
822  
823  
824  
825  
826  
827  
828  
829  
830  
831  
832  
833  
834  
835  
836  
837  
838  
839  
840  
841  
842  
843  
844  
845  
846  
847  
848  
849  
850  
851  
852  
853  
854  
855  
856  
857  
858  
859  
860  
861  
862  
863  
864  
865  
866  
867  
868  
869  
870  
871  
872  
873  
874  
875  
876  
877  
878  
879  
880  
881  
882  
883  
884  
885  
886  
887  
888  
889  
890  
891  
892  
893  
894  
895  
896  
897  
898  
899  
900  
901  
902  
903  
904  
905  
906  
907  
908  
909  
910  
911  
912  
913  
914  
915  
916  
917  
918  
919  
920  
921  
922  
923  
924  
925  
926  
927  
928  
929  
930  
931  
932  
933  
934  
935  
936  
937  
938  
939  
940  
941  
942  
943  
944  
945  
946  
947  
948  
949  
950  
951  
952  
953  
954  
955  
956  
957  
958  
959  
960  
961  
962  
963  
964  
965  
966  
967  
968  
969  
970  
971  
972  
973  
974  
975  
976  
977  
978  
979  
980  
981  
982  
983  
984  
985  
986  
987  
988  
989  
990  
991  
992  
993  
994  
995  
996  
997  
998  
999  
1000

40 **Results:** The ATUMI genome encodes fewer enzymes for plant digestion than the  
41  
42  
43  
44  
45  
46  
47  
48  
49  
50  
51  
52  
53  
54  
55  
56  
57  
58  
59  
60  
61  
62  
63  
64  
65  
66  
67  
68  
69  
70  
71  
72  
73  
74  
75  
76  
77  
78  
79  
80  
81  
82  
83  
84  
85  
86  
87  
88  
89  
90  
91  
92  
93  
94  
95  
96  
97  
98  
99  
100  
101  
102  
103  
104  
105  
106  
107  
108  
109  
110  
111  
112  
113  
114  
115  
116  
117  
118  
119  
120  
121  
122  
123  
124  
125  
126  
127  
128  
129  
130  
131  
132  
133  
134  
135  
136  
137  
138  
139  
140  
141  
142  
143  
144  
145  
146  
147  
148  
149  
150  
151  
152  
153  
154  
155  
156  
157  
158  
159  
160  
161  
162  
163  
164  
165  
166  
167  
168  
169  
170  
171  
172  
173  
174  
175  
176  
177  
178  
179  
180  
181  
182  
183  
184  
185  
186  
187  
188  
189  
190  
191  
192  
193  
194  
195  
196  
197  
198  
199  
200  
201  
202  
203  
204  
205  
206  
207  
208  
209  
210  
211  
212  
213  
214  
215  
216  
217  
218  
219  
220  
221  
222  
223  
224  
225  
226  
227  
228  
229  
230  
231  
232  
233  
234  
235  
236  
237  
238  
239  
240  
241  
242  
243  
244  
245  
246  
247  
248  
249  
250  
251  
252  
253  
254  
255  
256  
257  
258  
259  
260  
261  
262  
263  
264  
265  
266  
267  
268  
269  
270  
271  
272  
273  
274  
275  
276  
277  
278  
279  
280  
281  
282  
283  
284  
285  
286  
287  
288  
289  
290  
291  
292  
293  
294  
295  
296  
297  
298  
299  
300  
301  
302  
303  
304  
305  
306  
307  
308  
309  
310  
311  
312  
313  
314  
315  
316  
317  
318  
319  
320  
321  
322  
323  
324  
325  
326  
327  
328  
329  
330  
331  
332  
333  
334  
335  
336  
337  
338  
339  
340  
341  
342  
343  
344  
345  
346  
347  
348  
349  
350  
351  
352  
353  
354  
355  
356  
357  
358  
359  
360  
361  
362  
363  
364  
365  
366  
367  
368  
369  
370  
371  
372  
373  
374  
375  
376  
377  
378  
379  
380  
381  
382  
383  
384  
385  
386  
387  
388  
389  
390  
391  
392  
393  
394  
395  
396  
397  
398  
399  
400  
401  
402  
403  
404  
405  
406  
407  
408  
409  
410  
411  
412  
413  
414  
415  
416  
417  
418  
419  
420  
421  
422  
423  
424  
425  
426  
427  
428  
429  
430  
431  
432  
433  
434  
435  
436  
437  
438  
439  
440  
441  
442  
443  
444  
445  
446  
447  
448  
449  
450  
451  
452  
453  
454  
455  
456  
457  
458  
459  
460  
461  
462  
463  
464  
465  
466  
467  
468  
469  
470  
471  
472  
473  
474  
475  
476  
477  
478  
479  
480  
481  
482  
483  
484  
485  
486  
487  
488  
489  
490  
491  
492  
493  
494  
495  
496  
497  
498  
499  
500  
501  
502  
503  
504  
505  
506  
507  
508  
509  
510  
511  
512  
513  
514  
515  
516  
517  
518  
519  
520  
521  
522  
523  
524  
525  
526  
527  
528  
529  
530  
531  
532  
533  
534  
535  
536  
537  
538  
539  
540  
541  
542  
543  
544  
545  
546  
547  
548  
549  
550  
551  
552  
553  
554  
555  
556  
557  
558  
559  
560  
561  
562  
563  
564  
565  
566  
567  
568  
569  
570  
571  
572  
573  
574  
575  
576  
577  
578  
579  
580  
581  
582  
583  
584  
585  
586  
587  
588  
589  
590  
591  
592  
593  
594  
595  
596  
597  
598  
599  
600  
601  
602  
603  
604  
605  
606  
607  
608  
609  
610  
611  
612  
613  
614  
615  
616  
617  
618  
619  
620  
621  
622  
623  
624  
625  
626  
627  
628  
629  
630  
631  
632  
633  
634  
635  
636  
637  
638  
639  
640  
641  
642  
643  
644  
645  
646  
647  
648  
649  
650  
651  
652  
653  
654  
655  
656  
657  
658  
659  
660  
661  
662  
663  
664  
665  
666  
667  
668  
669  
670  
671  
672  
673  
674  
675  
676  
677  
678  
679  
680  
681  
682  
683  
684  
685  
686  
687  
688  
689  
690  
691  
692  
693  
694  
695  
696  
697  
698  
699  
700  
701  
702  
703  
704  
705  
706  
707  
708  
709  
710  
711  
712  
713  
714  
715  
716  
717  
718  
719  
720  
721  
722  
723  
724  
725  
726  
727  
728  
729  
730  
731  
732  
733  
734  
735  
736  
737  
738  
739  
740  
741  
742  
743  
744  
745  
746  
747  
748  
749  
750  
751  
752  
753  
754  
755  
756  
757  
758  
759  
760  
761  
762  
763  
764  
765  
766  
767  
768  
769  
770  
771  
772  
773  
774  
775  
776  
777  
778  
779  
780  
781  
782  
783  
784  
785  
786  
787  
788  
789  
790  
791  
792  
793  
794  
795  
796  
797  
798  
799  
800  
801  
802  
803  
804  
805  
806  
807  
808  
809  
810  
811  
812  
813  
814  
815  
816  
817  
818  
819  
820  
821  
822  
823  
824  
825  
826  
827  
828  
829  
830  
831  
832  
833  
834  
835  
836  
837  
838  
839  
840  
841  
842  
843  
844  
845  
846  
847  
848  
849  
850  
851  
852  
853  
854  
855  
856  
857  
858  
859  
860  
861  
862  
863  
864  
865  
866  
867  
868  
869  
870  
871  
872  
873  
874  
875  
876  
877  
878  
879  
880  
881  
882  
883  
884  
885  
886  
887  
888  
889  
890  
891  
892  
893  
894  
895  
896  
897  
898  
899  
900  
901  
902  
903  
904  
905  
906  
907  
908  
909  
910  
911  
912  
913  
914  
915  
916  
917  
918  
919  
920  
921  
922  
923  
924  
925  
926  
927  
928  
929  
930  
931  
932  
933  
934  
935  
936  
937  
938  
939  
940  
941  
942  
943  
944  
945  
946  
947  
948  
949  
950  
951  
952  
953  
954  
955  
956  
957  
958  
959  
960  
961  
962  
963  
964  
965  
966  
967  
968  
969  
970  
971  
972  
973  
974  
975  
976  
977  
978  
979  
980  
981  
982  
983  
984  
985  
986  
987  
988  
989  
990  
991  
992  
993  
994  
995  
996  
997  
998  
999  
1000



1  
2  
3  
4 **Conclusions:** Our results provide new insights into the genomic basis for local adaption  
5  
6 and invasiveness in ATUMI, and a blueprint for control strategies that target this pest  
7  
8 without harming their honey bee hosts. A minimal set of gustatory receptors is  
9  
10 consistent with the observation that, once a host colony is invaded, food resources are  
11  
12 predictable. Unique detoxification pathways and pathway members can help identify  
13  
14 which treatments might control this species even in the presence of honey bees, which  
15  
16 are notoriously sensitive to pesticides.  
17  
18  
19  
20  
21  
22  
23  
24

25 **Keywords:** Coleoptera, pollination, *Apis mellifera*, invasive pest, phytophagy, glycoside  
26  
27 hydrolase.  
28  
29  
30  
31  
32

### 33 **Introduction**

34  
35 The small hive beetle (= ATUMI; *Aethina tumida* Coleoptera: Nitidulidae, Murray, 1867)  
36  
37 is a rapidly spreading invasive species originating from sub-Saharan Africa. ATUMI is  
38  
39 now found on all continents except Antarctica [1-4]. Outside of its endemic range, it has  
40  
41 become an economically important parasite of social bee colonies, including honey  
42  
43 bees, bumblebees and stingless bees [2] (Figure 1). ATUMI significantly impacts  
44  
45 beekeeping and the regulation of honey bees and hive products worldwide. ATUMI eggs  
46  
47 are laid within colonies and developing larvae feed until they leave the colony for  
48  
49 pupation [2]. ATUMI pupate in the soil then emerge as adults to infest social bee nests.  
50  
51  
52  
53  
54  
55  
56  
57  
58  
59  
60  
61  
62  
63  
64  
65

1  
2  
3  
4 arise [2]. ATUMI larvae and adults can feed on a large variety of food sources inside and  
5  
6 outside of social bee colonies, including fruits, meat, adult bees, bee brood and bee  
7  
8 food stores (pollen and honey) [1, 5, 6]. Beetles and their bee hosts show an elaborate  
9  
10 set of interactions. For example, honey bees attempt to confine adult ATUMI to prisons  
11  
12 built from plant resins [6] and beetles can also manipulate guard bees to obtain food by  
13  
14 rubbing their antennae against the guarding bees' mandibles, inducing them to  
15  
16 regurgitate food.  
17  
18  
19  
20  
21

22           ATUMI belongs to the beetle family Nitidulidae (sap beetles; c. 4,500 species),  
23  
24 which feed mainly on decaying vegetable matter, over-ripe fruit, or sap. The Nitidulidae  
25  
26 belong to the superfamily Cucujoidea (sap, bark and fungus beetles), which is either the  
27  
28 sister-group of the Phytophaga (leaf beetles, weevils, longhorned beetles and their  
29  
30 relatives; [7], the most species rich radiation of plant-feeding animals on Earth with  
31  
32 >125,000 described species), or forms a paraphyletic clade subtending the Phytophaga  
33  
34 [8, 9]. In the latter case, the Phytophaga are derived from within Cucujoidea.  
35  
36 Interestingly, the trophic habits of Nitidulidae may therefore represent a transitional  
37  
38 stage from fungivory, saprophagy, and detritivory (the typical habit(s) of most  
39  
40 Cucujoidea and its containing clade, series Cucujiformia) to phytophagy (feeding on  
41  
42 plants), the typical trophic habit of Phytophaga. Comparative studies of the ATUMI  
43  
44 genome may therefore provide new insights into the evolution and genomic basis of  
45  
46 phytophagy in beetles.  
47  
48  
49  
50  
51  
52  
53  
54  
55

56           To date, just 10 beetle genome assemblies have been released [10], of which only 7  
57  
58 are published, despite there being >400,000 described beetle species. These are:  
59  
60  
61  
62  
63  
64  
65

1  
2  
3  
4 *Tribolium castaneum* (red flour beetle, TCAST; Tenebrionoidea: Tenebrionidae:  
5  
6 Tenebrioninae; [11], *Anoplophora glabripennis* (Asian longhorned beetle, AGLAB;  
7  
8 Chrysomeloidea: Cerambycidae: Lamiinae; [12]), *Dendroctonus ponderosae* (mountain  
9  
10 pine beetle, DPOND; Curculionoidea: Curculionidae: Scolytinae; [13]), *Hypothenemus*  
11  
12 *hampei* (coffee berry borer beetle, HHAMP; Curculionoidea: Curculionidae: Scolytinae;  
13  
14 [14]), *Oryctes borbonicus* (Reunion Island scarab beetle, OBORB; Scarabaeoidea:  
15  
16 Scarabaeidae: Dynastinae; [15]), *Onthophagus taurus* (bull headed dung beetle, OTAUR;  
17  
18 Scarabaeoidea: Scarabaeidae: Scarabaeinae; Unpublished), *Nicrophorus vespilloides*  
19  
20 (burying beetle, NVESP; Staphylinoidea: Silphidae: Silphinae; [16]), *Agrilus planipennis*  
21  
22 (emerald ash borer, APLAN; Buprestoidea: Buprestidae: Agrilinae; Unpublished),  
23  
24 *Leptinotarsa decemlineata* (Colorado potato beetle, LDECE; Chrysomelidae:  
25  
26 Chrysomelinae: Doryphorini; [17]), and *Pogonus chalceus* (salt marsh beetle, PCHAL;  
27  
28 [Carabidae](#): [Trechinae](#): [Pogonini](#); Unpublished). The ATUMI genome described here joins  
29  
30 this group as the only representative from the superfamily Cucujoidea.  
31  
32  
33  
34  
35  
36  
37  
38  
39  
40

41 A robust reference genome assembly comprised of 243 million base pairs was  
42  
43 used to identify and annotate 14,076 protein coding genes, over 3000 additional  
44  
45 transcribed features and a strong complement of repetitive DNA's, tRNA's, and  
46  
47 transposable elements. The described protein-coding genes provide strong candidates  
48  
49 for core metabolism and development, and suggest that these beetles, like their honey  
50  
51 bee hosts, rely on olfactory cues and less so on chemosenses related to taste. An  
52  
53 analysis of protein groups involved in insecticide metabolism reveals a large repertoire  
54  
55 of detoxification enzymes to mediate xenobiotic interactions. The described resources  
56  
57  
58  
59  
60  
61  
62  
63  
64  
65

1  
2  
3  
4 will be useful for both chemical and non-chemical approaches for controlling this key  
5  
6  
7 pest of honey bees.  
8  
9

## 10 11 **Results and discussion**

### 12 *Genome traits, genetic diversity and phylogenetic analysis*

13  
14  
15 We generated a genome assembly of 243 Mbp (Million base pair) comprised of 3063  
16  
17 contigs (contig N<sub>50</sub>=298kb; Table 1). The genome sizes of sequenced and assembled  
18  
19 beetle species vary greatly from 160Mbp to 1.1Gbp. The size of the ATUMI genome  
20  
21 assembly larger than that of the red flour beetle (165.9 Mbp), but much smaller than  
22  
23 the more derived Asian longhorned beetle (707.7 Mbp). A total of 1,293,015  
24  
25 heterozygous single nucleotide polymorphism (SNP) positions were identified, with an  
26  
27 average density of one SNP per 181 bp. SNP density was significantly different across  
28  
29 contigs (T-test,  $P < 0.01$ ). This pattern was not related to contig size. Overall, 60.2% of  
30  
31 SNPs occurred on contigs with annotated genome features and 22.5% were within gene  
32  
33 regions.  
34  
35  
36  
37  
38  
39  
40  
41

42  
43 The NCBI eukaryotic genome annotation pipeline

44  
45 ([https://www.ncbi.nlm.nih.gov/genome/annotation\\_euk/Aethina\\_tumida/100/](https://www.ncbi.nlm.nih.gov/genome/annotation_euk/Aethina_tumida/100/))

46  
47 proposed 14,076 protein-coding genes and a total of 17,436 mRNA models. When our  
48  
49 previous RNA sequencing reads were aligned to the genome assembly alongside the  
50  
51 predicted gene models, 99.73% of the predicted mRNA models and 99.65% of the  
52  
53 predicted protein-coding genes were supported. It is possible that the 64 protein-coding  
54  
55 genes undetected by RNA-Seq were not expressed, expressed too briefly, or not  
56  
57  
58  
59  
60  
61  
62  
63  
64  
65

1  
2  
3  
4 captured in our pooled RNA samples. Alternatively, these might reflect partial or  
5  
6 inaccurate gene models or pseudo-genes that are no longer functional in this beetle.  
7  
8

9  
10 By aligning the ATUMI official protein set against 2,444 core Endopterygota  
11 Benchmarking Universal Single-Copy Orthologs (BUSCO), 97.5% of complete BUSCOs  
12 were found (Figure 2b). We further aligned the ATUMI genome assembly against  
13 Endopterygota set of BUSCOs and 92.8% of complete BUSCOs were found  
14 (Supplemental File 1). The results suggest a high level of completeness in the genome  
15 assembly, as well as the official set of gene models. By comparing single-copy orthologs  
16 among the sequenced beetles (ATUMI, TCAST, DPOND, AGLAB, ATATUR, APLAN, HHAMP,  
17 NVESP), honey bees (AMELL) and *Drosophila melanogaster* (DMELA), 181 shared  
18 ortholog groups were found. A phylogenetic tree was built by concatenating these  
19 shared 181 orthologous groups (Figure 2a). These results suggest that ATUMI is sister to  
20 TCAST and the Asian longhorned beetle (AGLAB). OrthoDB [18] orthology delineation  
21 revealed that ATUMI has 7066 conserved orthologous groups with beetles and 4554  
22 orthologous groups shared with ten additional insect species.  
23  
24  
25  
26  
27  
28  
29  
30  
31  
32  
33  
34  
35  
36  
37  
38  
39  
40  
41  
42  
43  
44

#### 45 *Loss and duplication of BUSCO genes from the small hive beetle genome*

46  
47

48 The duplication and absence of core genes, including those represented by BUSCO,  
49 could represent important evolutionary changes in species or in lineages (Figure 3). A  
50 complete protein set of 11 insect species was used for alignment against the ATUMI  
51 BUSCO candidates. We found 337 core Endopterygota BUSCOs that were either  
52 fragmented or completely lost from at least two beetle genomes. We mapped the  
53  
54  
55  
56  
57  
58  
59  
60  
61  
62  
63  
64  
65

1  
2  
3  
4 common ancestor sequences of these 337 missing orthologs and full set of 2442  
5  
6 Endopterygota BUSCOs to the Pfam database. Among the 'lost' orthologs, 1094 protein  
7  
8 domains were found, while among 2442 Endopterygota orthologs, 4632 protein  
9  
10 domains were found. By comparing the count distribution of each domain between lost  
11  
12 orthologs and overall orthologs, no significant difference was found (Pearson's Chi-  
13  
14 square Test,  $P > 0.05$ ). Among the lost orthologs, a methyltransferase (MT), a  
15  
16 glycosyltransferase (GT), and two proteins with beta-transducin repeats (WD) and zinc  
17  
18 finger (ZF) domains, respectively showed the highest counts and were also absent from  
19  
20 at least four beetle species (Figure 2c).  
21  
22  
23  
24  
25  
26  
27  
28  
29  
30  
31  
32

### 33 *Glycoside hydrolases*

34  
35 Glycoside hydrolases (GHs) are important enzymes that aid in the digestion of plant cell  
36  
37 walls and carbohydrates in insects [19]; however, GHs can also contribute to remodeling  
38  
39 of the peritrophic matrix (PM) [20], lysosomal enzyme activity, glycoprotein  
40  
41 oligosaccharide catabolism, immune response, and growth and development [21, 22]. A  
42  
43 limited diversity of GH families was identified in the ATUMI genome when compared to  
44  
45 other beetles. While phytophagous insects, such as AGLAB [7], DPOND [13] and HHAMP  
46  
47 [14] harbored anywhere from 19-24 different GH families represented by 101-199  
48  
49 genes, only 14 GH families represented by 91 genes were identified in the ATUMI  
50  
51 genome. Only OBORB, whose diet is unknown [15], had a lower GH family diversity and  
52  
53  
54  
55  
56  
57  
58  
59  
60  
61  
62  
63  
64  
65

1  
2  
3  
4 GH copy number, with 13 different families represented by 47 different genes. No GH  
5  
6  
7 families unique to ATUMI were identified (Supplemental Files 2 and 3).  
8

9  
10 Using orthology searches, five orthogroups containing GHs were more  
11 prominent in the ATUMI genome compared to other beetles and two GHs lacked  
12 orthologs in other beetle genomes. The more prominent orthogroups contained genes  
13  
14 with highest scoring BLASTP matches to GH 30 glucosylceramidase (eight copies;  
15 sphingolipid metabolism), uncharacterized GH 31  $\alpha$ -glucosidases (five copies), GH 16  $\beta$ -  
16  
17 1,3-glucan binding protein (five copies; exoskeleton and/or PM remodeling), GH 38  
18  
19 lysosomal  $\alpha$ -mannosidase (five copies), and GH 18 chitinase (three copies). Interestingly,  
20  
21 unigenes coding for GH 18 (20 copies), GH 31 (11 copies), and GH 38 enzymes were also  
22  
23 among the most prominent GH families in the ATUMI genome (Figure 4). Generally, GH  
24  
25 38 copy numbers were high in the ATUMI genome relative to other beetles and were  
26  
27 exceeded only by TCAST. In contrast, copy numbers of GH 18 and 31 genes were similar  
28  
29 to those found across other beetles. Additionally, two GH genes encoded by the ATUMI  
30  
31 genome lacked orthology to other beetle GHs, including a GH 2 family gene coding for  $\beta$ -  
32  
33 mannosidase and a GH 35 family gene coding for  $\beta$ -galactosidase. Other beetles code for  
34  
35 GH 2  $\beta$ -mannosidases and GH 35  $\beta$ -galactosidases, so it is unclear why these two genes  
36  
37 were not assigned to orthogroups. However, the evolutionary history of genes coding  
38  
39 for GH enzymes is complex and it may be difficult to assign orthologs in some cases.  
40  
41  
42  
43  
44  
45  
46  
47  
48  
49  
50  
51  
52

53 Overall, ATUMI lacked a diverse and expansive repertoire of GHs relative to  
54  
55 phytophagous beetles, which may reflect the ATUMI diet. Pollen generally contains high  
56  
57 concentrations of the monosaccharides glucose and fructose [23], which are used  
58  
59  
60  
61  
62

1  
2  
3  
4 directly for ATP production by the glycolysis pathway (glucose) or after phosphorylation  
5  
6 by fructokinase (fructose). Therefore, although pollen can also contain starch, sucrose,  
7  
8 and small amounts of pectin [23], digestion of more complex carbohydrates may not be  
9  
10 necessary, requiring a less expansive repertoire of GH enzymes relative to  
11  
12 phytophagous beetles. Supporting this hypothesis, genes coding for enzymes capable of  
13  
14 digesting starch were identified ( $\alpha$ -amylase), but genes coding for invertases and  
15  
16 polygalacturonases for sucrose and pectin digestion could not be identified.  
17  
18 Alternatively, microbial symbionts harbored by ATUMI may facilitate the breakdown of  
19  
20 these polysaccharides as has been observed previously in their honey bee hosts, which  
21  
22 share a similar diet [24].  
23  
24  
25  
26  
27  
28  
29  
30  
31

### 32 *Gustatory Receptors*

33  
34  
35 G-protein-coupled receptors (GPCRs) comprise a large family of integral membrane  
36  
37 proteins found in cells of all eukaryotes [25]. GPCRs function to detect extracellular  
38  
39 stimuli, and activate cellular signal transduction pathways that ultimately lead to  
40  
41 physiological and behavioral responses. Gustatory receptors (GRs) belong to novel  
42  
43 arthropod GPCR gene superfamilies, which are phylogenetically unrelated to  
44  
45 mammalian taste receptor genes, and distinct from related insect odorant/pheromone  
46  
47 receptor genes [26]. GRs are important components of an organism's sensory  
48  
49 machinery; the ability of animals to distinguish between nutritious, noxious, and  
50  
51 possibly toxic compounds is a matter of life or death. Sensory machinery has been  
52  
53 honed over evolutionary time, and has given rise to receptors binding either sweet  
54  
55  
56  
57  
58  
59  
60  
61  
62  
63  
64  
65



1  
2  
3  
4 (attractive) or bitter (aversive) tastants, [27, 28]. An amino-acid substitution in a ligand-  
5  
6 binding region may affect the range at which different ligand's receptors may bind,  
7  
8 particularly for GRs perceiving sugars [29].  
9

10  
11 Gustatory receptor genes fall into four main clades that correspond with  
12 perception of different tastants (sweet or bitter; Figure 5). Designations of the type of  
13 substance perceived by these receptors can be inferred from other taxa (e.g., *Drosophila*  
14 sp.), and the positions of uncharacterized proteins within the cladogram. A group of  
15 apparently highly conserved genes encoding proteins for perceiving sweet substances  
16 (clades *5a* and *64a-f*) is separate from other groups that show higher sequence  
17 variability; a pattern seen in other studies (e.g., [30]). Proteins of *GR5a* and *GR64a-f* can  
18 form heterodimeric complexes at receptor sites, and may or may not be necessary  
19 together for perception of different sugars [31, 32]. ATUMI appears to lack a *GR5a* gene  
20 (Table 2; Figure 5), suggesting this gene may not be necessary for perceiving sweet  
21 tastants. In this group of ATUMI *GRs*, it is interesting to note that one candidate with a  
22 very long branch-length (XP\_019866072) encodes a 379 amino-acid protein derived  
23 from 3 exons, and has a very long intron. It is unclear why this gene is so distinct  
24 compared to the relatively highly conserved sequences for other related *GR* genes.  
25  
26  
27  
28  
29  
30  
31  
32  
33  
34  
35  
36  
37  
38  
39  
40  
41  
42  
43  
44  
45  
46  
47

48 A major finding is that ATUMI has a substantially depauperate repertoire of *GR*  
49 genes compared to both AGLAB and TCAST (Figure 5). This low number of *GRs* in ATUMI  
50 is more likely the result of a lack of gene expansion in particular lineages or subfamilies  
51 of *GRs* rather than gene loss. A similarly small number of *GRs* is evident in the honey bee  
52 genome [33]. In that species, the relatively reduced *GR* gene repertoire may be a  
53  
54  
55  
56  
57  
58  
59  
60  
61  
62  
63  
64  
65

1  
2  
3  
4 consequence of restricted dietary breadth (specialist on pollen and nectar), and also  
5  
6 possibly arises from the processing of collected foods by adult workers and microbes,  
7  
8 which may reduce the load of plant secondary compounds. AMELL larvae are fed  
9  
10 processed foods by attending nurse bees, so they may not need an expansive repertoire  
11  
12 of GRs to discriminate among different tastants [30]. Because of the close affinity of  
13  
14 ATUMI with honey bees, including sharing a similar diet, the evolutionary pressures  
15  
16 limiting expansion of GRs in ATUMI may be similar. As an example, TCAST, a dietary  
17  
18 generalist, shows a significant expansion in the *GR28a/b* gene complex (Table 2); genes  
19  
20 in this complex may be important for perceiving plant secondary compounds [34].  
21  
22  
23  
24  
25  
26  
27

28           Stemming from their importance to insect biology, GRs have been characterized  
29  
30 from genomic and transcriptomic studies for a number of economically important  
31  
32 insects, or those having an ecological and/or epidemiological significance, including  
33  
34 TCAST [11], AGLAB [12] and now ATUMI (this study). Understanding the chemosensory  
35  
36 abilities of insects, particularly pest insects, is important for designing possible means of  
37  
38 control that target the insect's ability to find and/or distinguish among nutrients or to  
39  
40 detect poisons, and/or developing baits containing insecticides formulated with highly  
41  
42 attractive substances.  
43  
44  
45  
46  
47  
48  
49  
50

### 51 *Voltage-gated sodium channel*

52  
53 The voltage-gated sodium channel ( $Na_{v1}$ ) is responsible for generating action potentials  
54  
55 in neurons. Sodium channel modulator insecticides such as pyrethroids and DDT act on  
56  
57 the  $Na_{v1}$  channel by maintaining the open state of the channel via interactions with two  
58  
59  
60  
61  
62

1  
2  
3  
4 proposed binding sites [35, 36]. A diverse collection of mutations in Na<sub>v1</sub> has been  
5  
6 identified in many populations of pyrethroid-resistant pests and neurophysiological  
7  
8 studies of heterologously-expressed channels have confirmed the role of these  
9  
10 mutations in pyrethroid resistance [37].  
11  
12  
13

14  
15 A single transcript and protein were predicted for Na<sub>v1</sub> from the ATUMI  
16  
17 assembly. However, Na<sub>v1</sub> is known to possess optional and alternative exons in most  
18  
19 insects [38-40]. Alternative exon use diversifies the physiological repertoire of the  
20  
21 sodium channel and may affect insecticide sensitivity [41]. Further cloning experiments  
22  
23 to determine the actual optional and alternative exon use in ATUMI Na<sub>v1</sub> should be  
24  
25 informative.  
26  
27  
28  
29

30  
31 A large number of mutations in Na<sub>v1</sub> have been associated with target site  
32  
33 resistance to pyrethroids and DDT [37]. We did not identify such mutations in the  
34  
35 predicted ATUMI Na<sub>v1</sub> nor is this species known to be resistant to these insecticides.  
36  
37 Therefore, this sequence serves as a reference for a susceptible target site for  
38  
39 pyrethroids and DDT and a tool for developing molecular diagnostic assays to monitor  
40  
41 changes in resistance allele frequency.  
42  
43  
44  
45  
46  
47

#### 48 *Acetylcholinesterase*

49

50  
51 Acetylcholinesterase (Ace) cleaves acetylcholine (ACh) to regulate the effect of the  
52  
53 neurotransmitter in the synaptic cleft. Ace is the target of organophosphate (OP) and  
54  
55 carbamate insecticides and mutations in Ace result in target-site insensitivity to these  
56  
57 two insecticide classes [42, 43].  
58  
59  
60  
61  
62

1  
2  
3  
4  
5  
6  
7  
8  
9  
10  
11  
12  
13  
14  
15  
16  
17  
18  
19  
20  
21  
22  
23  
24  
25  
26  
27  
28  
29  
30  
31  
32  
33  
34  
35  
36  
37  
38  
39  
40  
41  
42  
43  
44  
45  
46  
47  
48  
49  
50  
51  
52  
53  
54  
55  
56  
57  
58  
59  
60  
61  
62  
63  
64  
65

ATUMI is predicted to possess active forms of both Ace1 (XP\_019871456.1) and Ace2 (XP\_019866656.1) (Supplemental File 2). Ace mutations involved in OP resistance [43, 44] are found to be in the susceptible state in the predicted Ace proteins of ATUMI (Table 3). In the cases where an alternative amino acid was found in ATUMI (i.e, ATUMI\_Ace2 position 198), that same amino acid was seen in other insects that were presumably sensitive to OPs, so it does not likely confer reduced OP sensitivity. Ace2 performs primary acetylcholine esterase activity in honey bees, while Ace1 is the primary enzyme in beetles and most other insects [45]. Therefore identifying compounds that only inhibit ATUMI\_Ace1 may provide a level of ATUMI-specific control.

1  
2  
3  
4  
5  
6  
7  
8  
9  
10  
11  
12  
13  
14  
15  
16  
17  
18  
19  
20  
21  
22  
23  
24  
25  
26  
27  
28  
29  
30  
31  
32  
33  
34  
35  
36  
37  
38  
39  
40  
41  
42  
43  
44  
45  
46  
47  
48  
49  
50  
51  
52  
53  
54  
55  
56  
57  
58  
59  
60  
61  
62  
63  
64  
65

1 *ATP-Binding Cassette Proteins*

2 ATP-binding cassette (ABC) proteins are a large, diverse family of proteins found in most  
3 organisms, from bacteria to plants and vertebrates. Most ABC proteins engage in active  
4 transport of molecules across cell membranes. This family of transporters is perhaps most  
5 notable for moving toxins into or out of cells, which has resulted in the identification of several  
6 of these proteins playing a role in the resistance of cancer cells to multiple drug treatments  
7 (Multi-Drug Resistant, MDR). So it is not surprising that some of these proteins have been  
8 identified as having roles in insect susceptibility or resistance to certain insecticides (Reviewed  
9 by [46]). In spite of their importance for shaping pest control methods, these genes are under-  
10 studied in insects, with few having been fully characterized in any species. The status of ATUMI  
11 as a pest of beehives makes it important to understand what role ABC genes may play in how  
12 beekeepers control this species.

13         The beetle genetic model organism, TCAST, has had its full suite of ABC-family genes  
14 identified through a combination of RNA-seq and genomic analysis. In this species, 74 genes  
15 have been identified (Table 4); [47, 48]. The translation products of these genes were used to  
16 query the ATUMI genome, in which 56 ABC genes were identified (Table 4). In most respects,  
17 the makeup of ABC genes in ATUMI resemble those found in TCAST - both species have  
18 identical numbers of ABC-B, D, E, F, and H subfamily members. Indeed, the numbers of  
19 members in the D-F and H subfamilies are highly conserved, with DMELA having the same  
20 number, and clear one-to-one relationships can be seen in these subfamilies among the  
21 members from each species (Figure 6). It should be noted that members of subfamilies E and F  
22 do not function as transporters, and are highly conserved in number and sequence between

1  
2  
3  
4  
5  
6  
7  
8  
9  
10  
11  
12  
13  
14  
15  
16  
17  
18  
19  
20  
21  
22  
23  
24  
25  
26  
27  
28  
29  
30  
31  
32  
33  
34  
35  
36  
37  
38  
39  
40  
41  
42  
43  
44  
45  
46  
47  
48  
49  
50  
51  
52  
53  
54  
55  
56  
57  
58  
59  
60  
61  
62  
63  
64  
65

23 insects and humans. Moreover, RNAi targeting ABC-E and one of the ABC-F genes in TCAST  
24 resulted in complete mortality, suggesting that the critical cellular roles of these genes may also  
25 be conserved. The ABC-B subfamily also appears well conserved, and may be worth further  
26 scrutiny in ATUMI, since this subfamily has been associated with resistance to several classes of  
27 pesticides in multiple species [46].

28 ATUMI differed from TCAST in member counts for three ABC subfamilies (Table 4). The  
29 first was subfamily A, for which only four members could be identified in ATUMI, relative to the  
30 ten found in TCAST and DMELA, a number roughly consistent across the insects. However, it is  
31 important to note that ABC-A genes are fairly large full transporters, and as such are often  
32 complex and difficult to identify in full. So, it is likely that some of the ABC-A genes are either  
33 not present in the current genome assembly, or are too fractured to recognize. It is also  
34 interesting to note that the beetle ABC-A genes appear to segregate from those of DMELA  
35 (Figure 6), suggesting possible pesticide targets against ATUMI, which may not harm other  
36 species, including pollinators.

37 TCAST appears to have one more ABC-G gene than does ATUMI; specifically, ATUMI  
38 appears to lack an ortholog of the well-studied DMELA eye-pigment transporter known as  
39 Brown (Bw). However, it has been well documented that Bw orthologs has substantially  
40 diverged in TCAST [48]. It is possible that similar divergence has also prevented clear  
41 identification of a Bw ortholog in ATUMI. Otherwise, most other ABC-G genes have clear one-  
42 to-one orthologs in all three species (Figure 6).

43 The largest subfamily, the ABC-C genes, is known to play roles in multi-drug resistance  
44 in human disease, and some have been associated with Bt resistance in lepidopterans [46].

1  
2  
3  
4 45 ATUMI has fewer ABC-Cs than TCAST, but more than DMELA. At first, this might suggest a  
5  
6  
7 46 beetle-specific expansion as well as a TCAST-specific expansion. Indeed, there is a suite of  
8  
9  
10 47 expansions that may be beetle-specific (Figure 6), although comparisons to more species would  
11  
12 48 be required to confirm this. However, each species also appears to have its own expansions;  
13  
14  
15 49 TCAST and ATUMI expansions are often tandem, as can be seen by the number of genes found  
16  
17 50 on the same linkage groups/scaffolds (Figure 6). Indeed, there are surprisingly few clear one-to-  
18  
19  
20 51 one orthologous relationships, suggesting rapid evolution of ABC-C genes to fill species-specific  
21  
22 52 needs. To understand ATUMI responses to pesticides, these ATUMI-specific expansions may be  
23  
24  
25 53 worth further study.  
26  
27

28 54

### 30 55 *Gluthatione-S-Transferase*

31  
32  
33 56 Gluthatione-S-Transferases (GSTs) are conjugases that bind glutathione to a wide variety of  
34  
35 57 substrates such as plant allelochemicals, insecticides, reactive oxygen species, and metabolic  
36  
37  
38 58 products that can provide detoxification, antioxidant, excretion, and transport functions [49],  
39  
40  
41 59 [50], [51]. Insect GSTs are widely studied due to their role in insecticide resistance [52].  
42  
43 60 Genomic analyses show that insects possess between 10 to 41 genes that encode GSTs  
44  
45  
46 61 distributed across 8 classes (i.e. Delta, Epsilon, Omega, Sigma, Theta, Zeta, Microsomal, and  
47  
48 62 Unclassified) [53].  
49

50  
51 63 In the ATUMI genome, 49 GSTs were identified, 9 of which displayed isoforms (Figure 7;  
52  
53 64 Table 5). The number of genes in the ATUMI genome is very similar to what has been identified  
54  
55  
56 65 in TCAST, especially in the Delta, Epsilon, Sigma, and Theta classes. Relative to other insects,  
57  
58  
59 66 ATUMI and TCAST have expansions in the Epsilon, Sigma, Zeta, and Microsomal GST classes,  
60  
61  
62

1  
2  
3  
4 67 which supports the hypothesis that these may be Coleoptera-specific class expansions [53]. The  
5  
6  
7 68 small number of genes in the Delta class for both ATUMI and TCAST suggests a class contraction  
8  
9  
10 69 or lack of expansion within the beetles.

11  
12 70 Increases in the expression and activity Delta and Epsilon classes confer resistance to  
13  
14  
15 71 diverse classes of insecticides such organophosphates, organochlorines (DDT), and pyrethroids  
16  
17 72 [50], [52]. These two GST classes tend to be the most numerous and dynamic in terms of  
18  
19  
20 73 expansions and contractions [53]. Therefore it would appear that ATUMI possesses a wide  
21  
22 74 diversity of GSTs, especially in the Epsilon class, to detoxify insecticides utilized for their control.  
23  
24

25 75

26  
27  
28 76 *Cytochrome P450*  
29

30 77 The Cytochrome P450 monooxygenases (CYP450s) are classified as phase I metabolic  
31  
32  
33 78 enzymes which are involved in the biosynthesis, bioactivation, and regulation of endogenous  
34  
35 79 compounds such as hormones, fatty acids, and sterols as well as detoxification of xenobiotic  
36  
37  
38 80 compounds such as plant allelochemicals and insecticides. Overexpression of CYP450s often  
39  
40  
41 81 underlies high levels of detoxification-mediated insecticide resistance in many insects [54] [55]  
42  
43 82 [56]. In the 69 insect genomes that have been published, more than 7,500 P450 genes have  
44  
45  
46 83 been identified in 208 families across 4 clans (CYP2, CYP3, CYP4 and Mitochondrial) [57].  
47

48 84 In ATUMI, we found 116 genes across the 4 CYP clans (Figure 8, Table 6). The CYP2 and  
49  
50  
51 85 mitochondrial clans contained 8 and 10 genes, respectively, and orthologs were identified in  
52  
53 86 other species. The conservation in sequence and number is expected as many of the genes in  
54  
55  
56 87 these clans are involved in ecdysteroid biosynthesis [58]. In contrast to the conserved CYP2 and  
57  
58  
59 88 mitochondrial clans, there are clear expansions in CYP3 and CYP4 compared to other species.  
60  
61  
62  
63  
64  
65



1  
2  
3  
4 89 These expansions are typified by large expansions of a single family that lacks orthologs in other  
5  
6  
7 90 species [59]. Within the CYP3 clan, the 55 genes are clustered in smaller blooms with the largest  
8  
9  
10 91 consisting of 13 genes. The 43 genes belonging to the CYP4 clan of ATUMI is among the largest  
11  
12 92 seen in insects [7] with a noticeably large bloom of 20 genes. Additionally, CYPs in the CYP3 and  
13  
14  
15 93 CYP4 clans have been implicated in insecticide resistance [60] [61] [62]. Therefore, a rapid onset  
16  
17 94 of insecticide resistance may be facilitated by the large number of CYPs in the CYP3 and CYP4  
18  
19  
20 95 clans in the ATUMI genome.

21  
22 96

### 23 24 25 97 *Carboxyl/Choline Esterases*

26  
27 98 Carboxyl/Choline Esterases (COEs) are capable of metabolizing a wide variety of substrates and  
28  
29  
30 99 their activity is involved in a number of physiological processes such as bioactivation of juvenile  
31  
32  
33 100 hormone and regulating acetylcholine interactions at the synapse [63] [64]. Increases in the  
34  
35 101 amount of esterase expression and mutations in the catalytic site of esterases confer insecticide  
36  
37  
38 102 resistance [65] [66]. Insects possess a wide variety of COEs that are broadly classified as  
39  
40  
41 103 intracellular or dietary (Clades A-C), secreted pheromone/hormone processing (Clades D-G),  
42  
43 104 and neurodevelopmental (Clades H-M) [63].

44  
45  
46 105 The ATUMI genome contained 60 genes encoding putative COEs, with only one  
47  
48 106 displaying multiple isoforms (Figure 9). The number of genes in the secreted and  
49  
50  
51 107 neurodevelopmental groups was mostly consistent with other insects (Table 7). The expansion  
52  
53 108 of Clade E (Secreted  $\beta$ -esterase) is consistent with a similar expansion in TCAST. This expansion  
54  
55  
56 109 is not entirely characteristic of Coleoptera as DPOND and AGLAB only have 4 and 1 member of  
57  
58  
59 110 Clade E, respectively [7]. The 10 genes for neuroligins is nearly twice the number seen in other

1  
2  
3  
4  
5  
6  
7  
8  
9  
10  
11  
12  
13  
14  
15  
16  
17  
18  
19  
20  
21  
22  
23  
24  
25  
26  
27  
28  
29  
30  
31  
32  
33  
34  
35  
36  
37  
38  
39  
40  
41  
42  
43  
44  
45  
46  
47  
48  
49  
50  
51  
52  
53  
54  
55  
56  
57  
58  
59  
60  
61  
62  
63  
64  
65

111 insects [12] [67] [68]. Nevertheless, the general conservation in sequence and number suggests  
112 critical roles for these COEs across insects. In contrast to COEs in the secreted and  
113 neurodevelopmental groups, a vast majority of ATUMI COEs in the intracellular or dietary class  
114 lacked clear orthologs in TCAST, AMELL, or DMELA. This expansion of intracellular or dietary  
115 esterases is consistent with expansions observed in other insect genomes. These species-  
116 specific expansions of intracellular or dietary esterases may be due to dietary differences  
117 among these insects. Dietary esterases may also contribute to insecticide resistance [63].  
118 Therefore, this expansive array of dietary esterases may allow ATUMI to detoxify insecticides  
119 that may be used for control.

120 ATUMI is an expanding invasive pest of honey bees, disrupting managed bee colonies  
121 and arguably having a strong impact on feral on naturally occurring colonies. We anticipate the  
122 resources described here will lead to novel methods to track and control this pest. The ATUMI  
123 genome also reveals numerous evolutionary distinctions relative to other sequenced  
124 arthropods. These distinctions help clarify the sensory cues used by ATUMI and the dietary  
125 habits of this beetle, and of beetles (order Coleoptera) more broadly.

126  
127 **Methods**

128 *DNA extraction*

129 ATUMI adults were collected from a population maintained by the USDA-ARS Honey Bee  
130 Breeding, Genetics and Physiology Laboratory (Baton Rouge, LA) in November 2011. ATUMI  
131 larvae were collected March 8, 2014, from a continuous culture of small hive beetles  
132 maintained at the USDA-ARS Bee Research Laboratory. For adult beetles, extractions were

1  
2  
3  
4  
5  
6  
7  
8  
9  
10  
11  
12  
13  
14  
15  
16  
17  
18  
19  
20  
21  
22  
23  
24  
25  
26  
27  
28  
29  
30  
31  
32  
33  
34  
35  
36  
37  
38  
39  
40  
41  
42  
43  
44  
45  
46  
47  
48  
49  
50  
51  
52  
53  
54  
55  
56  
57  
58  
59  
60  
61  
62  
63  
64  
65

133 carried out on three whole male beetles using the Qiagen DNAEasy kit. Larval DNA was  
134 extracted from 150 second-instar larvae in 30 groups of five larvae each. Larvae were crushed  
135 using a plastic pestle in 1ml of freshly prepared CTAB buffer consisting of 100 mM TrisHCl (pH  
136 8.0), 20 mM EDTA (pH. 8.0), 1.4 M NaCl, 2% CTAB and 0.2%  $\beta$ -mercaptoethanol. The suspension  
137 was incubated at 65°C for 60 minutes, with gentle mixing at 0, 20, and 40 minutes. Samples  
138 were centrifuged for 2 min at 14k rpm (20817 g) in an Eppendorf microcentrifuge. 500  $\mu$ l of the  
139 supernatant was moved into a new tube containing using a wide-bore pipette into a sterile tube  
140 containing 500  $\mu$ l chloroform:isoamylalcohol (24:1). After gentle mixing by hand, tubes were  
141 centrifuged at 14k rpm for 15 min. Approximately 400  $\mu$ l of the aqueous layer was transferred  
142 into new tubes containing 250  $\mu$ l cold isopropanol, followed by gentle mixing and incubation at  
143 4°C for 30 minutes. Samples were centrifuged at 14k rpm for 30 min a 4°C, and then the  
144 supernatant was poured off. Pellets were washed with 1 ml cold 75% EtOH and centrifuged  
145 again for 2 min at 14k rpm. After the supernatant was poured off, the resulting pellets were  
146 washed in 1 ml cold 100% EtOH, centrifuged for 2 min, after which the EtOH was poured off,  
147 the pellets were spun for an additional 30 seconds, and the last of the wash was removed by  
148 pipette. Pellets were air-dried for 30 minutes and the resulting DNA pellet was resuspended in  
149 50  $\mu$ l ddH<sub>2</sub>O. Samples were incubated for 30 min with 2.5  $\mu$ l of an RNase cocktail at 37°C,  
150 followed by gentle addition of 5  $\mu$ l of 7M NaOAc and 100  $\mu$ l EtOH. After 30 minutes of  
151 incubation on wet ice, the DNA samples were spun at 12k rpm for 30 min, washed once with  
152 70% EtOH, dried and suspended in 20  $\mu$ l ddH<sub>2</sub>O. Extracts were pooled and assayed by gel  
153 electrophoresis to ensure DNA integrity and by Nanodrop (Thermofisher, Inc.) for quantification  
154 (180 ng/ $\mu$ l in 25  $\mu$ l, 45  $\mu$ g total DNA).

1  
2  
3  
4 155  
5  
6  
7 156 DNA sequencing  
8  
9  
10 157 In total, 1,173,425,522 Illumina DNA reads (101 base-pairs [bp] per read with a 300 bp insert  
11  
12 158 size, Hi-Seq 2500) were generated from 12 paired-end (PE) libraries generated from DNA from  
13  
14 159 the three adult male beetles. An additional 1,235,055 Pacific BioSciences (PacBio) reads  
15  
16  
17 160 (average read length = 6795 bp) were generated from 40 SMRT cells (Chemistry C2, PacBio,  
18  
19  
20 161 Menlo Park, CA), using DNA derived from the pooled larval beetles. A two-step method was  
21  
22 162 used to assemble the genome. First, the Sparse assembler was used to build short but accurate  
23  
24  
25 163 contigs from the Illumina reads using the settings: (LD 0 K 41 g 15 NodeCovTh 1 EdgeCovTh 0 GS  
26  
27  
28 164 600000000) [69]. The assembled contigs were used as a backbone for further assembly.  
29  
30 165 Second, the PacBio reads were error corrected by the proovread package (default settings) [70]  
31  
32  
33 166 and the error-corrected PacBio reads were used to construct long contigs by filling the gaps of  
34  
35 167 the backbones using the Sparc package deployed with default settings [71]. Genes were  
36  
37  
38 168 annotated using version 7.2 of the NCBI eukaryotic annotation pipeline [72]. Illumina mRNA  
39  
40  
41 169 paired-end sequencing reads (101 bp per read, >1000x transcriptome coverage) reflecting an  
42  
43 170 equimolar pool of all ATUMI life stages (described in [73] and downloaded from USDA  
44  
45  
46 171 AgDataCommons; <https://tinyurl.com/ybanauxb>) were used to assist gene annotation. Full  
47  
48 172 annotation details for this gene set are described at  
49  
50  
51 173 [https://www.ncbi.nlm.nih.gov/genome/annotation\\_euk/Aethina\\_tumida/100/](https://www.ncbi.nlm.nih.gov/genome/annotation_euk/Aethina_tumida/100/). Transcriptome  
52  
53  
54 174 sequencing reads were aligned to the constructed ATUMI genome assembly to evaluate the  
55  
56 175 completeness of the gene set, using the TopHat2 package [45]. Reads were also mapped using  
57  
58  
59 176 HISAT2 (<https://ccb.jhu.edu/software/hisat2/index.shtml>), showing a marginal increase in

1  
2  
3  
4 177 aligned reads. We further assessed the completeness of the genome assembly using BUSCO  
5  
6  
7 178 (Benchmarking Universal Single Copy Orthologs; [74]).  
8  
9

10 179

11  
12 180 *Phylogenetic and genetic diversity of beetles*  
13

14  
15 181 The official protein sets of ATUMI, the red flour beetle (*Tribolium castaneum*) [11], mountain  
16

17 182 pine beetle (*Dendroctonus ponderosae*) [13], Asian longhorned beetle (*Anoplophora*  
18

19  
20 183 *glabripennis*) [12], dung beetle (*Onthophagus taurus*;  
21

22 184 [https://www.ncbi.nlm.nih.gov/assembly/GCA\\_000648695.1/](https://www.ncbi.nlm.nih.gov/assembly/GCA_000648695.1/)), emerald ash borer (*Agrilus*  
23

24  
25 185 *planipennis*; [https://www.ncbi.nlm.nih.gov/assembly/GCF\\_000699045.1/](https://www.ncbi.nlm.nih.gov/assembly/GCF_000699045.1/)), coffee borer beetle  
26

27  
28 186 (*Hypothenemus hampei*) [14], burying beetle (*Nicrophorus vespilloides*) [16], scarab beetle  
29

30 187 (*Oryctes borbonicus*) [15], honey bee (*Apis mellifera*) [75], and fruit fly (*Drosophila*  
31

32  
33 188 *melanogaster*) [76] were used to query the BUSCO Endopterygota ortholog set. Single copy  
34

35 189 orthologs shared by all 11 insect species were further used for phylogenetic analysis. Protein  
36

37  
38 190 sequences of these orthologous groups (OGs) were aligned using MUSCLE using default protein  
39

40  
41 191 settings [77]. Alignments were quality trimmed with trimAl (-w 3 -gt 0.95 -st 0.01) [78] and the  
42

43 192 orthologous groups were concatenated for use in phylogenetic analysis. A maximum likelihood  
44

45  
46 193 (ML) tree search was implemented using the program RAxML version 8.2.9 [79] with 1000  
47

48 194 bootstrap replicates (-N 1000 -m PROTGAMMAAUTO -f a). The final tree was viewed and  
49

50  
51 195 edited with TreeGraph2 [80]. Microsatellite markers were identified in the ATUMI genome  
52

53  
54 196 assembly using the Microsatellite Search and Building Database (MSDB) package and default  
55

56 197 settings [81]. The raw Illumina gDNA reads, used to assemble the ATUMI genome, were re-  
57

58  
59 198 aligned to the assembly using BWA with default settings [82]. The aligned reads were used to  
60

1  
2  
3  
4  
5  
6  
7  
8  
9  
10  
11  
12  
13  
14  
15  
16  
17  
18  
19  
20  
21  
22  
23  
24  
25  
26  
27  
28  
29  
30  
31  
32  
33  
34  
35  
36  
37  
38  
39  
40  
41  
42  
43  
44  
45  
46  
47  
48  
49  
50  
51  
52  
53  
54  
55  
56  
57  
58  
59  
60  
61  
62  
63  
64  
65

199 identify single nucleotide polymorphism (SNP) positions using GATK under default settings  
200 (version 3.6; [83]), and the further annotated with SNPEFF [84].

201

### 202 *Gustatory Receptors*

203 The repertoire of gustatory receptors has been preliminarily characterized for TCAST [85] (62  
204 GRs) and *A. glabripennis* [86]. Additionally, online databases have listed gustatory receptors for  
205 *T. castaneum*, including UniProtKB ([www.uniprot.org](http://www.uniprot.org) [87]), and BeetleBase  
206 ([www.Beeblebase.org](http://www.Beeblebase.org) [88]). Amino acid sequences for putative and identified *GR* genes were  
207 compiled from these resources and truncated to remove redundancies. The compiled TCAST  
208 gene set contained 71 *GR* genes. To identify and enumerate gustatory receptors for AGLAB and  
209 ATUMI, amino acid sequences of TCAST gustatory receptor genes were submitted to the ATUMI  
210 RefSeq gene set and genome assembly using BLASTP and TBLASTN, respectively. Putative *GR*  
211 genes for both species were selected from hits based on an E-score  $\leq$  to  $E^{-100}$ . Using the data set  
212 of *GR* genes compiled for *T. castaneum*, 38 and 11 putative GR proteins were identified for  
213 AGLAB and ATUMI, respectively. Sequences were aligned using MUSCLE [77]. The PhyML  
214 program (v3.1/3.0 aLRT) was used to build a phylogenetic tree using maximum likelihood  
215 method [25, 89]. The tree was further edited and visualized with the TreeDyn (v198.3)  
216 program [90]. All analyses from the sequence alignment to tree reconstruction were  
217 performed on the phylogeny.fr platform [91]. Sequences obtained in Newick format from  
218 this platform were used as input in the iTOL program to construct and visualize using an  
219 unrooted, circular phylogenetic tree [92].

220

1  
2  
3  
4  
5  
6  
7  
8  
9  
10  
11  
12  
13  
14  
15  
16  
17  
18  
19  
20  
21  
22  
23  
24  
25  
26  
27  
28  
29  
30  
31  
32  
33  
34  
35  
36  
37  
38  
39  
40  
41  
42  
43  
44  
45  
46  
47  
48  
49  
50  
51  
52  
53  
54  
55  
56  
57  
58  
59  
60  
61  
62  
63  
64  
65

221 *ABC Transporters*

222 Potential ATUMI ABC genes homologous to TCAST ABCs were identified using protein BLAST to  
223 search with each TCAST ABC sequence using WebApollo at [https://i5k.nal.usda.gov/aethina-](https://i5k.nal.usda.gov/aethina-tumida)  
224 *tumida*. Protein sequences from ATUMI, TCAST, and DMELA were then compiled, and trimmed  
225 to exclude all but 51 residues around the Walker B motif of the nucleotide binding domain. This  
226 51-amino-acid sequence was then used to build the phylogenetic tree (See Table 3 for the  
227 sequences used from ATUMI). The maximum likelihood phylogenetic tree was constructed  
228 using the program MEGA, version 7 [93], using default parameters in all categories except: LG  
229 model of amino-acid substitution with Gamma distributed substitution rates (based on Best  
230 Model determination within the MEGA program), and Partial Deletion treatment of  
231 gaps/missing data [94].

232  
233 *Insecticide targets and detoxification genes*

234 The predicted proteins from the official gene set of ATUMI (taxid 116153) were queried with  
235 TCAST orthologs for gene families and pathway members related to insecticide resistance via  
236 BLASTP. Putative orthologs in ATUM were designated by >95% query coverage and E-value <1E<sup>-100</sup>.

237  
238  
239 **Additional files**

240 **File S1 MS-Word. Detailed material and methods.**

241 **File S2 MS-Excel. Orthology assignments for glycoside hydrolases (GHs) coded by ATUMI.**

242 **File S3 MS-Excel. Protein identifiers for orthogroup assignments.**

1  
2  
3  
4  
5  
6  
7  
8  
9  
10  
11  
12  
13  
14  
15  
16  
17  
18  
19  
20  
21  
22  
23  
24  
25  
26  
27  
28  
29  
30  
31  
32  
33  
34  
35  
36  
37  
38  
39  
40  
41  
42  
43  
44  
45  
46  
47  
48  
49  
50  
51  
52  
53  
54  
55  
56  
57  
58  
59  
60  
61  
62  
63  
64  
65

243

**Data and Material**

Data supporting the results of this article are deposited at NCBI-Bioproject PRJNA256171.

246

**Abbreviations**

ATUMI: small hive beetle; BUSCO: Benchmarking Universal Single Copy Orthologs

249

**Competing Interest**

The authors declare no competing interest.

252

**Funding**

No external funding

255

256

**Author contribution**

J.D.E. and Q.H. designed the study. E.S. analyzed digestive proteins. D.M., B.D., N. G., S. C., N. E.,

M. L., S. R. and F. R. analyzed detoxification genes. J.D.E., D.M., B.D., N. G., S. C., N. E., M. L., S.

R., P. N., F. R. and Q.H. wrote the manuscript.

261

**Acknowledgements**

We appreciate the bioinformatics support from the Competency Centre in Bioinformatics and

Computational Biology, Bern, Switzerland



1  
2  
3  
4  
5  
6  
7  
8  
9  
10  
11  
12  
13  
14  
15  
16  
17  
18  
19  
20  
21  
22  
23  
24  
25  
26  
27  
28  
29  
30  
31  
32  
33  
34  
35  
36  
37  
38  
39  
40  
41  
42  
43  
44  
45  
46  
47  
48  
49  
50  
51  
52  
53  
54  
55  
56  
57  
58  
59  
60  
61  
62  
63  
64  
65

265 **Tables**

267 **Table 1.** Assembly statistics of the small hive beetle genome assembly

|                                           |        |
|-------------------------------------------|--------|
| Illumina (genome coverage)                | 535    |
| PacBio (genome coverage)                  | 50     |
| Assembly size (Mbp)                       | 234.3  |
| Number of contigs                         | 3063   |
| Largest contig (Kbp)                      | 2683.7 |
| Smallest contig (Kbp)                     | 1.26   |
| N50 (Kbp)                                 | 298.8  |
| Number of contig > 10 Kbp                 | 2236   |
| Number of contig > N50                    | 192    |
| Number of protein coding genes            | 14076  |
| Number of mRNAs                           | 17463  |
| Density of SNPs (bps per SNP position)    | 177    |
| Density of microsatellites (loci per Kbp) | 8.23   |

268

269

1  
2  
3  
4 270  
5  
6  
7 271  
8  
9  
10 272  
11  
12 273  
13  
14 274  
15  
16  
17 275  
18  
19  
20 276  
21  
22  
23  
24  
25  
26  
27  
28  
29  
30  
31  
32  
33  
34  
35  
36  
37  
38  
39  
40 277  
41  
42  
43  
44  
45  
46  
47  
48  
49  
50  
51  
52  
53  
54  
55  
56  
57  
58  
59  
60  
61  
62  
63  
64  
65

**Table 2.** The number of gustatory receptor (GR) genes from major groups for three coleopteran species; the small hive beetle, ATUMI, AGLAB, and TCAST and their putative coding for detecting either bitter or sweet tastants.

| Species      | Gustatory receptor group |    |       |     |       | Tastant type |        |       |
|--------------|--------------------------|----|-------|-----|-------|--------------|--------|-------|
|              | 2a                       | 5a | 28a/b | 43a | 64a-f | Total        | Bitter | Sweet |
| <b>AGLAB</b> | 11                       | 1  | 7     | 1   | 6     | 26           | 19     | 7     |
| <b>ATUMI</b> | 3                        | 0  | 2     | 2   | 4     | 11           | 5      | 6     |
| <b>TCAST</b> | 12                       | 3  | 30    | 12  | 14    | 71           | 42     | 29    |

1  
2  
3  
4 278 Table 3. Evaluation of resistance mutations in acetylcholine esterase and their status in ATUMI.

5  
6  
7 279 *Torpedo* Ace position number, the resistance mutations are described in [43].  
8

9  
10  
11  
12  
13  
14  
15  
16  
17  
18  
19  
20  
21  
22  
23  
24  
25  
26  
27  
28  
29  
30  
31  
32  
33  
34  
35  
36  
37  
38  
39

| <i>Torpedo</i> | Ace | ATUMI_Ace1 | Resistance Mutations | ATUMI_Ace1 |
|----------------|-----|------------|----------------------|------------|
| Position       |     | Position   |                      | State      |
| <b>119</b>     |     | 189        | G247S, G119D         | G          |
| <b>128</b>     |     | 198        | D237E                | D          |
| <b>201</b>     |     | 270        | A302S                | A          |
| <b>227</b>     |     | 296        | G265A, G262A         | G          |
| <b>290</b>     |     | 358        | F290V                | F          |
| <b>331</b>     |     | 399        | S431F, F445W, F439C  | F          |
|                |     |            |                      |            |
| <i>Torpedo</i> | Ace | ATUMI_Ace2 | Resistance Mutations | ATUMI_Ace2 |
| Position       |     | Position   |                      | State      |
| <b>78</b>      |     | 114        | F139L, F115S         | F          |
| <b>82</b>      |     | 118        | E81K                 | E          |
| <b>129</b>     |     | 177        | I161V/T              | I          |
| <b>151</b>     |     | 198        | V180L                | I          |

40  
41  
42  
43  
44  
45  
46  
47  
48  
49  
50  
51  
52  
53  
54  
55  
56  
57  
58  
59  
60  
61  
62  
63  
64  
65

1  
2  
3  
4  
5  
6  
7  
8  
9  
10  
11  
12  
13  
14  
15  
16  
17  
18  
19  
20  
21  
22  
23  
24  
25  
26  
27  
28  
29  
30  
31  
32  
33  
34  
35  
36  
37  
38  
39  
40  
41  
42  
43  
44  
45  
46  
47  
48  
49  
50  
51  
52  
53  
54  
55  
56  
57  
58  
59  
60  
61  
62  
63  
64  
65

|            |     |                |   |
|------------|-----|----------------|---|
| <b>227</b> | 280 | G265A, G262A/V | G |
| <b>238</b> | 290 | S291G          | T |
| <b>290</b> | 358 | F330Y, F237Y   | F |
| <b>328</b> | 383 | G365A, G368A   | G |
| <b>396</b> | 452 | G488S          | G |

280

**Table 4:** Numbers of ABC genes in each species, by subfamily. \* lower counts discussed in text.

| Species | Subfamily |   |    |   |   |   |     |   | Total |
|---------|-----------|---|----|---|---|---|-----|---|-------|
|         | A         | B | C  | D | E | F | G   | H |       |
| ATUMI   | 4*        | 6 | 24 | 2 | 1 | 3 | 13* | 3 | 56    |
| TCAST   | 10        | 6 | 35 | 2 | 1 | 3 | 14  | 3 | 74    |
| DMELA   | 10        | 8 | 14 | 2 | 1 | 3 | 15  | 3 | 56    |

281 Table 5. Comparison of the number of GSTs between ATUMI, AMELL, DMELA, and TCAST [53],  
282 [67].

| GST Class | ATUMI | AMELL | DMELA | TCAST |
|-----------|-------|-------|-------|-------|
|-----------|-------|-------|-------|-------|

1  
2  
3  
4  
5  
6  
7  
8  
9  
10  
11  
12  
13  
14  
15  
16  
17  
18  
19  
20  
21  
22  
23  
24  
25  
26  
27  
28  
29  
30  
31  
32  
33  
34  
35  
36  
37  
38  
39  
40  
41  
42  
43  
44  
45  
46  
47  
48  
49  
50  
51  
52  
53  
54  
55  
56  
57  
58  
59  
60  
61  
62  
63  
64  
65

|                     |    |    |    |    |
|---------------------|----|----|----|----|
| <b>Delta</b>        | 3  | 1  | 11 | 3  |
| <b>Epsilon</b>      | 19 | 0  | 14 | 19 |
| <b>Omega</b>        | 1  | 1  | 5  | 3  |
| <b>Sigma</b>        | 7  | 4  | 1  | 7  |
| <b>Theta</b>        | 1  | 1  | 4  | 1  |
| <b>Zeta</b>         | 5  | 1  | 2  | 1  |
| <b>Microsomal</b>   | 6  | 2  | 1  | 5  |
| <b>Unclassified</b> | 7  | 0  | 0  | 2  |
| <b>Total</b>        | 49 | 10 | 38 | 41 |

283

284

285 Table 6. Comparison of CYP450 genes in ATUMI, AMELL, DMELA, and TCAST.

| <b>P450 Clan</b>     | <b>ATUMI</b> | <b>AMELL</b> | <b>DMELA</b> | <b>TCAST</b> |
|----------------------|--------------|--------------|--------------|--------------|
| <b>CYP2</b>          | 8            | 8            | 6            | 8            |
| <b>CYP3</b>          | 55           | 28           | 36           | 82           |
| <b>CYP4</b>          | 43           | 4            | 32           | 49           |
| <b>Mitochondrial</b> | 10           | 6            | 11           | 10           |

1  
2  
3  
4  
5  
6  
7  
8  
9  
10  
11  
12  
13  
14  
15  
16  
17  
18  
19  
20  
21  
22  
23  
24  
25  
26  
27  
28  
29  
30  
31  
32  
33  
34  
35  
36  
37  
38  
39  
40  
41  
42  
43  
44  
45  
46  
47  
48  
49  
50  
51  
52  
53  
54  
55  
56  
57  
58  
59  
60  
61  
62  
63  
64  
65

|              |     |    |    |     |
|--------------|-----|----|----|-----|
| <b>Total</b> | 116 | 46 | 85 | 149 |
|--------------|-----|----|----|-----|

286

287

288

289

1  
2  
3  
4 290 Table 7. Comparison of COE from *Aethina tumida* to *Drosophila melanogaster*, *Tribolium*  
5  
6  
7 291 *castaneum*, and *Apis mellifera*. Nomenclature and gene counts follow McKenna 2016 [12] and  
8  
9  
10 292 Claudianos 2006. [67].

| COE Subfamily                                         | <i>ATUMI</i> | <i>AMELL</i> | <i>DMELA</i> | <i>TCAST</i> |
|-------------------------------------------------------|--------------|--------------|--------------|--------------|
| <b>Clades A-C (Dietary)</b>                           | 27           | 8            | 13           | 55           |
| <b>Clade D (Integument Esterases)</b>                 | 2            | 1            | 3            | 5            |
| <b>Clade E (Secreted <math>\beta</math>-esterase)</b> | 8            | 3            | 3            | 10           |
| <b>Clade F (JH Esterases)</b>                         | 3            | 1            | 2            | 1            |
| <b>Clade H (Glutactins)</b>                           | 2            | 0            | 4            | 2            |
| <b>Clade I (Unknown Function)</b>                     | 1            | 2            | 2            | 2            |
| <b>Clade J (Acetylcholinesterases)</b>                | 2            | 2            | 1            | 2            |
| <b>Clade K (Gliotactin)</b>                           | 1            | 1            | 1            | 2            |
| <b>Clade L (Neuroligins)</b>                          | 10           | 5            | 4            | 5            |
| <b>Clade M (Neurotactins)</b>                         | 4            | 1            | 2            | 1            |
| <b>Total</b>                                          | 60           | 24           | 35           | 85           |

56 293

58 294

1  
2  
3  
4  
5  
6  
7  
8  
9  
10  
11  
12  
13  
14  
15  
16  
17  
18  
19  
20  
21  
22  
23  
24  
25  
26  
27  
28  
29  
30  
31  
32  
33  
34  
35  
36  
37  
38  
39  
40  
41  
42  
43  
44  
45  
46  
47  
48  
49  
50  
51  
52  
53  
54  
55  
56  
57  
58  
59  
60  
61  
62  
63  
64  
65

295 **Figure Legends**

296

297 **Figure 1.** *Aethina tumida* (A) adult and (B) larva. Photos courtesy of Alex Wild Photography,  
used with permission.

299

300 **Figure 2. Phylogenetic tree and estimated completeness of the genomes of 11 insect species.**

301 A) The phylogenetic tree was constructed on protein sequences of 181 single copy orthologs  
302 shared among all 11 insect species. All nodes have 100% bootstrap support. AMELL and DMELA  
303 were used as outgroups. Branch lengths are shown for each node. B) Completeness of official  
304 protein sets of each insect species were assessed by aligning to the Endopterygota sets of  
305 benchmarking universal single-copy orthologs (BUSCOs). For ATUMI, 97.5% of complete  
306 BUSCOs were found. C) The pervasiveness of gene loss during endopterygote evolution. From  
307 the domain counts of lost BUSCOs, methyltransferase (MT), glycosyltransferase (GT) and  
308 leucine rich repeats (LRR) are among the top 5% of total domains and are commonly lost from  
309 multiple species. WD and ZF red boxes indicate that the gene is lost, while white boxes indicate  
310 that the gene is maintained in each species.

311

312 **Figure 3. Gene duplication events plotted against the average gene duplication event per**

313 **gene.** The protein sets of the 11 studied beetle species, as well as honey bee and fruit fly were  
314 searched against the Endopterygota BUSCO set using BLAST. Redundant proteins (including  
315 recent paralogs and those with known alternative splicing) were used to quantify the average  
316 number of duplication events per gene in each species.



1  
2  
3  
4  
5  
6  
7  
8  
9  
10  
11  
12  
13  
14  
15  
16  
17  
18  
19  
20  
21  
22  
23  
24  
25  
26  
27  
28  
29  
30  
31  
32  
33  
34  
35  
36  
37  
38  
39  
40  
41  
42  
43  
44  
45  
46  
47  
48  
49  
50  
51  
52  
53  
54  
55  
56  
57  
58  
59  
60  
61  
62  
63  
64  
65

317

318 **Figure 4. Glycoside hydrolase (GH) family copy numbers identified from beetle genomes.**

319 Genes coding for glycoside hydrolases were identified using Pfam domain assignments [95] and  
320 genome assemblies and coding gene predictions were obtained from NCBI (GenBank Accession  
321 Numbers: GCA\_000390285.1 AGLAB, GCA\_000355655.1 DPOND, GCA\_001412225.1 *N.*  
322 *vespilloides*, GCA\_001443705.1 *O. borbonicus*, GCA\_000002335.3 TCAST) with the exception of  
323 *H.s hampei*, which was downloaded from [https://genome.med.nyu.edu/coffee-](https://genome.med.nyu.edu/coffee-beetle/cbb.html)  
324 [beetle/cbb.html](https://genome.med.nyu.edu/coffee-beetle/cbb.html). Families are color coded from green to red based on their relative abundance  
325 (total count/total number of GH genes) with red representing GH families that are highly  
326 abundant ( $\geq 25\%$  of the total GH genes) and green representing GH families of lesser abundance  
327 ( $\leq 0.01\%$ ). Notably, the GH profiles of ATUMI and TCAST (neither of which feed on living plant  
328 material) differ strongly from the GH profiles of the phytophagous beetles, even though they all  
329 belong to the same infraorder, suggesting that diet, in part, might be driving the differences in  
330 GH family members and copy numbers. AGLAB=Asian longhorned beetle (*A. glabripennis*);  
331 HHAMP=Coffee berry borer (*H. hampei*); DPOND=Mountain pine beetle (*D. ponderosae*);  
332 NVESP=burying beetle (*N. vespilloides*); OBORB=scarab beetle (*O. borbonicus*); ATUMI=small  
333 hive beetle, and TCAST=red flour beetle (TCAST).

334 **Figure 5. Maximum likelihood cladogram for gustatory receptor genes from three coleopteran**

335 **species.** The small hive beetle, *Aethina tumida* (ATUMI; green labels/lines), the Asian long  
336 horned beetle, *Anoplophora glabripennis* (Agla; red labels/lines), and the red flour beetle,  
337 *Tribolium castaneum* (TCAST; blue labels/lines). Individual genes are labeled with species  
338 identifier and GenBank accession number. Scale bar for branch lengths represents 0.1 amino

1  
2  
3  
4  
5  
6  
7  
8  
9  
10  
11  
12  
13  
14  
15  
16  
17  
18  
19  
20  
21  
22  
23  
24  
25  
26  
27  
28  
29  
30  
31  
32  
33  
34  
35  
36  
37  
38  
39  
40  
41  
42  
43  
44  
45  
46  
47  
48  
49  
50  
51  
52  
53  
54  
55  
56  
57  
58  
59  
60  
61  
62  
63  
64  
65

339 acid substitutions per site. Ring around cladogram indicates gene families coded for perceiving  
340 bitter (yellow) and sweet (pink) tastants.

341  
**Figure 6. Maximum likelihood phylogenetic tree of ABC proteins from ATUMI (At), TCAST (Tc),  
and DMELA (Dm).** ATUMI genes are marked in blue, TCAST in green, and DMELA in purple. ABC  
subfamilies are indicated with colored lines to the right of the tree. Names for DMELA proteins  
were taken from Flybase (<http://flybase.org/reports/FBgg0000552>), and include the Flybase  
number for reference. TCAST names are taken from the two papers in which the genes were  
identified [47, 48], with the NCBI Refseq accession number provided for reference. ATUMI  
names were generated for this paper by combining the subfamily of the identified sequence  
with the scaffold on which the encoding gene may be found; if multiple ABC genes of a  
particular subfamily were found on the same scaffold, the sequences were given an additional  
letter designation based on their relative location, reading left to right on the scaffold as shown  
in WebApollo. For reference, the scaffold number and base coordinates for the gene have also  
been included.

**Figure 7. Maximum Likelihood phylogenetic tree of glutathione-S-transferase (GST) proteins.**

The bootstrap consensus tree inferred from 1000 replicates is taken to represent the  
evolutionary history of the taxa *A. tumida* (ATUMI) in green; *A. mellifera* (AMELL) in black; *D.  
melanogaster* (DMELA) in blue; and *T. castaneum* (TCAST) in red identified manually using the  
Uniprot and Pfam databases. Branches corresponding to partitions reproduced in less than 50%  
bootstrap replicates are collapsed. Initial tree(s) for the heuristic search were obtained

1  
2  
3  
4  
5  
6  
7  
8  
9  
10  
11  
12  
13  
14  
15  
16  
17  
18  
19  
20  
21  
22  
23  
24  
25  
26  
27  
28  
29  
30  
31  
32  
33  
34  
35  
36  
37  
38  
39  
40  
41  
42  
43  
44  
45  
46  
47  
48  
49  
50  
51  
52  
53  
54  
55  
56  
57  
58  
59  
60  
61  
62  
63  
64  
65

361 automatically by applying Neighbor-Join and BioNJ algorithms to a matrix of pairwise distances  
362 estimated using a JTT model, and then selecting the topology with superior log likelihood value.  
363 All positions with less than 95% site coverage were eliminated. The tree was annotated and  
364 visualized with the iTOL web tool (itol.embl.de/) [96].

365  
366 **Figure 8. Maximum Likelihood phylogenetic tree of the cytochrome P450 detoxification**  
367 **system.** The bootstrap consensus tree inferred from 1000 replicates is taken to represent the  
368 evolutionary history of the taxa *A. tumida* (ATUMI) in green; *A. mellifera* (AMELL) in black; *D.*  
369 *melanogaster* (DMELA) in blue; and *T. castaneum* (TCAST) in red identified manually using the  
370 Uniprot and Pfam databases. Branches corresponding to partitions reproduced in less than 50%  
371 bootstrap replicates are collapsed. Initial tree(s) for the heuristic search were obtained  
372 automatically by applying Neighbor-Join and BioNJ algorithms to a matrix of pairwise distances  
373 estimated using a JTT model, and then selecting the topology with superior log likelihood value.  
374 All positions with less than 95% site coverage were eliminated. P450s are clustered to CYP2,  
375 CYP3, CYP4 and mitochondrial clans. The tree was annotated and visualized with the iTOL web  
376 tool (itol.embl.de/) [96].

377  
378 **Figure 9. Maximum likelihood phylogenetic tree of carboxylesterase (COE) genes.** The  
379 maximum likelihood bootstrap consensus tree (1000 replicates) showing the relationships  
380 among COE genes from the genomes of *A. tumida* (ATUMI) in green; *A. mellifera* (AMELL) in  
381 black; *D. melanogaster* (DMELA) in blue; and *T. castaneum* (TCAST) in red, identified manually  
382 using the Uniprot and Pfam databases. Branches corresponding to partitions recovered in less

1  
2  
3  
4  
5  
6  
7  
8  
9  
10  
11  
12  
13  
14  
15  
16  
17  
18  
19  
20  
21  
22  
23  
24  
25  
26  
27  
28  
29  
30  
31  
32  
33  
34  
35  
36  
37  
38  
39  
40  
41  
42  
43  
44  
45  
46  
47  
48  
49  
50  
51  
52  
53  
54  
55  
56  
57  
58  
59  
60  
61  
62  
63  
64  
65

383 than 50% of bootstrap replicates are collapsed. Starting tree(s) for the heuristic search were  
384 obtained automatically using neighbor-joining and BioNJ algorithms applied to a matrix of  
385 pairwise distances estimated using a JTT model, and then selecting the topology with the  
386 superior log likelihood value. All positions with less than 95% site coverage were eliminated.  
387 The phylogenetically distinct clusters were named according to established nomenclature for  
388 COE genes [12]. The tree was annotated and visualized with the iTOL web tool [96].

390 References

391  
392 1. Lundie AE. The small hive beetle *Aethina tumida*, Science Bulletin 220. In: Forestry  
393 DoAa, (ed.). Pretoria, South Africa 1940.  
394 2. Neumann P, Pettis JS and Schäfer MO. Quo vadis *Aethina tumida*? Biology and control  
395 of small hive beetles. Apidologie. 2016;47 3:427-66. doi:10.1007/s13592-016-0426-x.  
396 3. Al Toufailia H, Alves DA, Bená DDC, Bento JMS, Iwanicki NSA, Cline AR, et al. First  
397 record of small hive beetle, *Aethina tumida* Murray, in South America. Journal of  
398 Apicultural Research. 2017;56 1:76-80. doi:10.1080/00218839.2017.1284476.  
399 4. Lee S, Hong KJ, Cho YS, Choi YS, Yoo MS and Lee S. Review of the subgenus *Aethina*  
400 Erichson s. str. (Coleoptera: Nitidulidae: Nitidulinae) in Korea, reporting recent invasion  
401 of small hive beetle, *Aethina tumida*. Journal of Asia-Pacific Entomology. 2017;20 2:553-  
402 8. doi:10.1016/j.aspen.2017.03.006.  
403 5. Buchholz S, Schäfer MO, Spiewok S, Pettis JS, Duncan M, Ritter W, et al. Alternative  
404 food sources of *Aethina tumida* (Coleoptera: Nitidulidae). Journal of Apicultural  
405 Research. 2008;47 3:202-9. doi:10.3827/IBRA.1.47.3.08.

1  
2  
3  
4  
5  
6  
7  
8  
9  
10  
11  
12  
13  
14  
15  
16  
17  
18  
19  
20  
21  
22  
23  
24  
25  
26  
27  
28  
29  
30  
31  
32  
33  
34  
35  
36  
37  
38  
39  
40  
41  
42  
43  
44  
45  
46  
47  
48  
49  
50  
51  
52  
53  
54  
55  
56  
57  
58  
59  
60  
61  
62  
63  
64  
65

406 6. Neumann P, Pirk CWW, Hepburn HR, Solbrig AJ, Ratnieks FLW, Elzen PJ, et al. Social  
407 encapsulation of beetle parasites by Cape honeybee colonies (*Apis mellifera capensis*  
408 Esch.). *Naturwissenschaften*. 2001;88 5:214-6. doi:10.1007/s001140100224.

409 7. Haddad S and Mckenna DD. Phylogeny and evolution of the superfamily  
410 Chrysomeloidea (Coleoptera: Cucujiformia). *Systematic Entomology*. 2016;41 4:697-  
411 716.

412 8. McKenna DD, A.L. Wild, K. Kanda, C.L. Bellamy, R.G. Beutel, M.S. Caterino, C.W.  
413 Farnum, D.C. Hawks, M.A. Ivie, M.L. Jameson, R.A.B. Leschen, A.E. Marvaldi, J.V.  
414 McHugh, A.F. Newton, J.A. Robertson, M.K. Thayer, M.F. Whiting, J.F. Lawrence, A.  
415 Ślipiński, D.R. Maddison, B.D. Farrell. The beetle tree of life reveals Coleoptera survived  
416 end Permian mass extinction to diversify during the Cretaceous terrestrial revolution.  
417 *Systematic Entomology*. 2015:1-46. doi:10.1111/syen.12132.

418 9. Robertson JA, A. Ślipiński, M. Moulton, F.W. Shockley, A. Giorgi, N.P. Lord, D.D.  
419 McKenna, W. Tomaszewska, J. Forrester, K.B. Miller, M.F. Whiting, J.V. McHugh.  
420 Phylogeny and classification of the beetle superfamily Cucujoidea and the recognition of  
421 a new superfamily Coccinelloidea (Coleoptera: Cucujiformia). 2015;*Systematic*  
422 *Entomology* doi:10.1111/syen.12138.

423 10. McKenna DD. Beetle genomes in the 21st century: prospects, progress and priorities. .  
424 *Current Opinion in Insect Science* 2018;25 76-82.

425 11. Richards S, Gibbs RA, Weinstock GM, Brown SJ, Denell R, Beeman RW, et al. The  
426 genome of the model beetle and pest *Tribolium castaneum*. *Nature*. 2008;452 7190:949-  
427 55. doi:10.1038/nature06784.

428 12. McKenna DD, Scully ED, Pauchet Y, Hoover K, Kirsch R, Geib SM, et al. Genome of the  
429 Asian longhorned beetle (*Anoplophora glabripennis*), a globally significant invasive  
430 species, reveals key functional and evolutionary innovations at the beetle-plant interface.  
431 *Genome Biology*. 2016;17 227 doi:10.1186/s13059-016-1088-8.

1  
2  
3  
4  
5  
6  
7  
8  
9  
10  
11  
12  
13  
14  
15  
16  
17  
18  
19  
20  
21  
22  
23  
24  
25  
26  
27  
28  
29  
30  
31  
32  
33  
34  
35  
36  
37  
38  
39  
40  
41  
42  
43  
44  
45  
46  
47  
48  
49  
50  
51  
52  
53  
54  
55  
56  
57  
58  
59  
60  
61  
62  
63  
64  
65

432 13. Keeling Clea. Draft genome of the mountain pine beetle, *Dendroctonus ponderosae*  
433 Hopkins, a major forest pest. 2013 14:R27.

434 14. Vega. Draft genome of the most devastating insect pest of coffee worldwide: the coffee  
435 berry borer, *Hypothenemus hampei*. Scientific Reports. 2015;5:12525.

436 15. Meyer JM, Markov GV, Baskaran P, Herrmann M, Sommer RJ and Rödelsperger C.  
437 Draft Genome of the Scarab Beetle *Oryctes borbonicus* on La Réunion Island. Genome  
438 Biology and Evolution. 2016;8 7:2093-15.

439 16. Cunningham CB, Ji L, Axel R, Wiberg W, Shelton J, McKinney EC, et al. The Genome  
440 and Methylome of a Beetle with Complex Social Behavior, *Nicrophorus vespilloides*  
441 (Coleoptera: Silphidae) Genome Biol Evol 2015;7 12:3383-96. doi:10.1093/gbe/evv194.

442 17. Schoville SD, Chen YH, Andersson MN, Benoit JB, Bhandari A, Bowsler JH, et al. A  
443 model species for agricultural pest genomics: the genome of the Colorado potato beetle,  
444 *Leptinotarsa decemlineata* (Coleoptera: Chrysomelidae). bioRxiv. 2017;  
445 doi:<http://dx.doi.org/10.1101/192641>.

446 18. Emms DM and Kelly S. OrthoFinder: solving fundamental biases in whole genome  
447 comparisons dramatically improves orthogroup inference accuracy. Genome Biology.  
448 2015;16:157.

449 19. Pauchet Y, Wilkinson P and Chauhan R. Diversity of the beetle genes encoding novel  
450 plant cell wall degrading enzymes. PloS One. 2010;5:e15635.

451 20. Merzendorfer H and Zimoch L. Chitin metabolism in insects: structure, function and  
452 regulation of chitin synthases and chitinases. Journal of Experimental Biology.  
453 2003;206:4393-412.

454 21. Kramer KJ and Muthukrishnan S. Insect chitinases: molecular biology and potential use  
455 as biopesticides. Insect Biochemistry and Molecular Biology. 1997;27:887-900.

1  
2  
3  
4  
5  
6  
7  
8  
9  
10  
11  
12  
13  
14  
15  
16  
17  
18  
19  
20  
21  
22  
23  
24  
25  
26  
27  
28  
29  
30  
31  
32  
33  
34  
35  
36  
37  
38  
39  
40  
41  
42  
43  
44  
45  
46  
47  
48  
49  
50  
51  
52  
53  
54  
55  
56  
57  
58  
59  
60  
61  
62  
63  
64  
65

456 22. Fujita Kea. A chitinase structurally related to the glycoside hydrolase family 48 is  
457 indispensable for hormonally induced diapause termination in a beetle. *Biochemical and*  
458 *Biophysical Research Communications*. 2006;345:502-7.

459 23. Pacini E. Types and meaning of pollen carbohydrate reserves. *Sexual Plant*  
460 *Reproduction*. 1996;362.

461 24. Engel P, Martinson VG and Moran NA. Functional diversity within the simple gut  
462 microbiota of the honey bee. *Proceedings of the National Academy of Sciences of the*  
463 *United States of America*. 2012;109 27:11002-7.

464 25. Guindon S and Gascuel O. A simple, fast, and accurate algorithm to estimate large  
465 phylogenies by maximum likelihood. *Syst Biol*. 2003;52 5:696-704.

466 26. Clyne PJ, Warr CG and Carlson JR. Candidate Taste Receptors in  
467 *Drosophila*. *Science*. 2000;287 5459:1830.

468 27. Thorne N, Chromey C Fau - Bray S, Bray S Fau - Amrein H and Amrein H. Taste  
469 perception and coding in *Drosophila*. *Current Biology*. 2004;14 12:1065-79.

470 28. Wang Z, Singhvi A Fau - Kong P, Kong P Fau - Scott K and Scott K. Taste  
471 representations in the *Drosophila* brain. *Cell*. 2004;117 7:981-91.

472 29. Isono K and Morita H. Molecular and cellular designs of insect taste receptor system.  
473 *Frontiers in Cellular Neuroscience*. 2010;4:20.

474 30. Robertson H and Wanner K. The chemoreceptor superfamily in the honey bee, *Apis*  
475 *mellifera*: expansion of the odorant, but no gustatory receptor family. *Genome Research*.  
476 2006;16:1395-403.

477 31. Amrein H. An expression system for Gustatory receptors—and why it failed. *Fly*. 2014;8  
478 4:232-3. doi:10.1080/19336934.2015.1039756.

479 32. Freeman EG, Wisotsky Z and Dahanukar A. Detection of sweet tastants by a conserved  
480 group of insect gustatory receptors. *Proceedings of the National Academy of Sciences*.  
481 2014;111 4:1598-603. doi:10.1073/pnas.1311724111.

1  
2  
3  
4  
5  
6  
7  
8  
9  
10  
11  
12  
13  
14  
15  
16  
17  
18  
19  
20  
21  
22  
23  
24  
25  
26  
27  
28  
29  
30  
31  
32  
33  
34  
35  
36  
37  
38  
39  
40  
41  
42  
43  
44  
45  
46  
47  
48  
49  
50  
51  
52  
53  
54  
55  
56  
57  
58  
59  
60  
61  
62  
63  
64  
65

482 33. Honey Bee Genome Sequencing Consortium. Insights into social insects from the  
483 genome of the honeybee *Apis mellifera*. Nature 2006;443:931-49.  
484 doi:10.1038/nature05260.

485 34. Wanner KW and Robertson HM. The gustatory receptor family in the silkworm moth  
486 *Bombyx mori* is characterized by a large expansion of a single lineage of putative bitter  
487 receptors. Insect Molecular Biology. 2008;17 6:621-9. doi:10.1111/j.1365-  
488 2583.2008.00836.x.

489 35. Du Y, Nomura Y, Satar G, Hu Z, Nauen R, He SY, et al. Molecular evidence for dual  
490 pyrethroid-receptor sites on a mosquito sodium channel. PNAS. 2013;110 29:11785-90.  
491 doi:10.1073/pnas.1305118110.

492 36. O'Reilly AO, Khambay BPS, Williamson MS, Field LA, Wallace BA and Davies TGE.  
493 Modelling insecticide-binding sites in the voltage-gated sodium channel. Biochem J.  
494 2006;396:255-63.

495 37. Rinkevich FD, Du Y and Dong K. Diversity and convergence of sodium channel  
496 mutations involved in resistance to pyrethroids Pestic Biochem Physiol. 2013;106:93-  
497 100.

498 38. Lee SH, Ingles PJ, Knipple DC and Soderlund DM. Developmental regulation of  
499 alternative exon usage in the house fly *Vssc1* sodium channel gene. Invert Neurosci.  
500 2002;4:125-33.

501 39. Shao YM, Dong K, Tang ZH and Zhang CX. Molecular characterization of a sodium  
502 channel gene from the silkworm *Bombyx mori*. Insect Biochem Molec Biol. 2009;39:145-  
503 51.

504 40. Davies T, Field L, Usherwood P and Williamson M. A comparative study of voltage-  
505 gated sodium channels in the Insecta: implications of pyrethroid resistance in  
506 Anopheline and other Neopteran species. Insect Molecular Biology. 2007;16 3:361-75.



1  
2  
3  
4  
5  
6  
7  
8  
9  
10  
11  
12  
13  
14  
15  
16  
17  
18  
19  
20  
21  
22  
23  
24  
25  
26  
27  
28  
29  
30  
31  
32  
33  
34  
35  
36  
37  
38  
39  
40  
41  
42  
43  
44  
45  
46  
47  
48  
49  
50  
51  
52  
53  
54  
55  
56  
57  
58  
59  
60  
61  
62  
63  
64  
65

507 41. Tan J. Alternative splicing of an insect sodium channel gene generates  
508 pharmacologically distinct sodium channels. *J Neurosci.* 2002;22:5300.

509 42. Fournier D and Mutero A. Modification of acetylcholinesterase as a mechanism of  
510 resistance to insecticides. *Comparative Biochemistry and Physiology* \108C. 1994:19-31.

511 43. Fournier D. Mutations of acetylcholinesterase which confer insecticide resistance in  
512 insect populations. *Chemico-Biol Intelect.* 2005;157:257-61.

513 44. Baek JH, Kim JI, Lee D-W, Chung BK, Miyata T and Lee SH. Identification and  
514 characterization of ace1-type acetylcholinesterase likely associated with  
515 organophosphate resistance in *Plutella xylostella*. *Pesticide Biochemistry and*  
516 *Physiology.* 2005;81 3:164-75.

517 45. Kim. TopHat2: accurate alignment of transcriptomes in the presence of insertions,  
518 deletions and gene fusions. *Genome biology.* 2013.

519 46. Dermauw W and Van Leeuwen T. The ABC gene family in arthropods: comparative  
520 genomics and role in insecticide transport and resistance. *Insect Biochemistry and*  
521 *Molecular Biology.* 2014;45:89-110.

522 47. Broehan G, Kroeger T, Lorenzen M and Merzendorfer H. Functional analysis of the ATP-  
523 binding cassette (ABC) transporter gene family of *Tribolium castaneum*. *BMC Genomics.*  
524 2013;14 6.

525 48. Grubbs N, Haas S, Beeman RW and Lorenzen MD. The ABCs of eye color in *Tribolium*  
526 *castaneum*: orthologs of the *Drosophila* white, scarlet, and brown Genes. *Genetics.*  
527 2015;199 3:749-59.

528 49. Simon JY. Insect glutathione S-transferases. *Zoological Studies.* 1996;35 1:9-19.

529 50. Che-Mendoza A, Penilla RP and Rodríguez DA. Insecticide resistance and glutathione  
530 S-transferases in mosquitoes: a review. *African Journal of Biotechnology,*. 2009;8 8.

531 51. Corona M and Robinson GE. Genes of the antioxidant system of the honey bee:  
532 annotation and phylogeny. *Insect Molecular Biology.* 2006;15 5:687-701.

1  
2  
3  
4  
5  
6  
7  
8  
9  
10  
11  
12  
13  
14  
15  
16  
17  
18  
19  
20  
21  
22  
23  
24  
25  
26  
27  
28  
29  
30  
31  
32  
33  
34  
35  
36  
37  
38  
39  
40  
41  
42  
43  
44  
45  
46  
47  
48  
49  
50  
51  
52  
53  
54  
55  
56  
57  
58  
59  
60  
61  
62  
63  
64  
65

533 52. Enayati AA, Ranson H and Hemingway J. Insect glutathione transferases and insecticide  
534 resistance. *Insect Molecular Biology*. 14 1:3-8.

535 53. Shi H, Pei L, Gu S, Zhu S, Wang Y and al. e. Glutathione S-transferase (GST) genes in  
536 the red flour beetle, *Tribolium castaneum*, and comparative analysis with five additional  
537 insects. *Genomics*. 2012;100 5:327-35.

538 54. Daborn PJ, Yen JL, Bogwitz MR, Le Goff G, Feil E and al. e. A Single P450 Allele  
539 Associated with Insecticide Resistance in *Drosophila*. *Science*. 2002;297 5590:2253-6.

540 55. Liu N and Scott JG. Increased transcription of CYP6D1 causes cytochrome P450-  
541 mediated insecticide resistance in house fly. *Insect Biochem Molec Biol*. 1998;28:531-5.

542 56. Hardstone MC, Komagata O, Kasai S, Tomita T and Scott JG. Use of isogenic strains  
543 indicates CYP9M10 is linked to permethrin resistance in *Culex pipiens quinquefasciatus*.  
544 *Insect Molec Biol*. 2010;19:717-26.

545 57. Nelson DR, 2018. Cytochrome P450 diversity in the tree of life. *Biochimica et Biophysica*  
546 *Acta (BBA)-Proteins and Proteomics*, 1866(1), pp.141-154. Cytochrome P450 diversity  
547 in the tree of life. *iochimica et Biophysica Acta (BBA)-Proteins and Proteomics*.  
548 2018;1866 1:141-54.

549 58. Gilbert LI. Halloween genes encode P450 enzymes that mediate steroid hormone  
550 biosynthesis in *Drosophila melanogaster*. *Mol Cell Endocrinol*. 2004;215:1-10.

551 59. Feyereisen R. Arthropod CYPomes illustrate the tempo and mode in P450 evolution.  
552 *Biochimica et Biophysica Acta (BBA)-Proteins and Proteomics*. 2011;1841 1:19-28.

553 60. Daborn P, Boundy S, Yen J and Pittendrigh B. DDT resistance in *Drosophila* correlates  
554 with Cyp6g1 over-expression and confers cross-resistance to the neonicotinoid  
555 imidacloprid. *Molecular Genetics and Genomics*. 2001;266 4:556-63.

556 61. Scott JG and Wen Z. Cytochromes P450 of insects: the tip of the iceberg. *Pest*  
557 *management science*. 2001;57 10:958-67.

1  
2  
3  
4  
5  
6  
7  
8  
9  
10  
11  
12  
13  
14  
15  
16  
17  
18  
19  
20  
21  
22  
23  
24  
25  
26  
27  
28  
29  
30  
31  
32  
33  
34  
35  
36  
37  
38  
39  
40  
41  
42  
43  
44  
45  
46  
47  
48  
49  
50  
51  
52  
53  
54  
55  
56  
57  
58  
59  
60  
61  
62  
63  
64  
65

558 62. Pridgeon JW, Zhang L and Liu N. Overexpression of CYP4G19 associated with a  
559 pyrethroid-resistant strain of the German cockroach, *Blattella germanica* (L.). *Genetics*.  
560 2003;314:157-63.

561 63. Oakeshott JG, Claudianos C, Campbell PM, Newcomb RD and Russell RJ. Biochemical  
562 genetics and genomics of insect esterases. In: Gilbert LI, Iatrou K and Gill SS, editors.  
563 *Comprehensive Molecular Insect Science*. Boston: Elsevier; 2005. p. 309-81.

564 64. Montella IR, Schama R and Valle D. The classification of esterases: an important gene  
565 family involved in insecticide resistance-A review. *Memorias do Instituto Oswaldo Cruz*  
566 2012;437-49.

567 65. Bass C and Field LM. Gene amplification and insecticide resistance. *Pest Management*  
568 *Science*. 2011;67:886-90.

569 66. Newcomb RD, Campbell PM, Ollis DL, Cheah E, Russell RJ and Oakeshott JG. A single  
570 amino acid substitution converts a carboxylesterase to an organophosphorus hydrolase  
571 and confers insecticide resistance on a blowfly. *Proceedings of the National Academy of*  
572 *Sciences* 1997;94:7464-8.

573 67. Claudianos C, Ranson H, Johnson RM, Biswas MA and Schuler ea. A deficit of  
574 detoxification enzymes: pesticide sensitivity and environmental response in the  
575 honeybee. *Insect Molecular Biology*. 2006;15 5:615-36.

576 68. Yu QY, Lu C, Li WL, Xiang ZH and Zhang Z. Annotation and expression of  
577 carboxylesterases in the silkworm, *Bombyx mori*. *BMC genomics*. 2009;10 1.

578 69. Ye C, Ma ZS, Cannon CH, Pop M and Yu DW. Exploiting sparseness in de novo  
579 genome assembly. *BMC Bioinformatic*. 2012; doi:10.1186/1471-2105-13-S6-S1.

580 70. Hackl TH, R.; Schultz, J.; Foerster, F. . proovread: large-scale high accuracy PacBio  
581 correction through iterative short read consensus. . 2014.

582 71. Ye C MZ. Sparc: a sparsity-based consensus algorithm for long erroneous sequencing  
583 reads. 2016; doi:10.7717.

1  
2  
3  
4  
5  
6  
7  
8  
9  
10  
11  
12  
13  
14  
15  
16  
17  
18  
19  
20  
21  
22  
23  
24  
25  
26  
27  
28  
29  
30  
31  
32  
33  
34  
35  
36  
37  
38  
39  
40  
41  
42  
43  
44  
45  
46  
47  
48  
49  
50  
51  
52  
53  
54  
55  
56  
57  
58  
59  
60  
61  
62  
63  
64  
65

584 72. Thibaud-Nissen F, Souvorov A, Murphy T, DiCuccio M and Kitts P. Eukaryotic Genome  
585 Annotation Pipeline. The NCBI Handbook, 2nd Edition. Bethesda, MD: National Center  
586 for Biotechnology Information (US); 2013.  
587 <https://www.ncbi.nlm.nih.gov/books/NBK169439/>.

588 73. Tarver MR, Huang Q, de Guzman L, Rinderer T, Holloway B, Reese J, et al.  
589 Transcriptomic and functional resources for the small hive beetle *Aethina tumida*, a  
590 worldwide parasite of honey bees. Genomics Data. 2016;9:97-9.  
591 doi:10.1016/j.gdata.2016.06.003.

592 74. Simão FA, Waterhouse RM, Ioannidis P, Kriventseva EV and Zdobnov EM. BUSCO:  
593 assessing genome assembly and annotation completeness with single-copy orthologs. .  
594 Bioinformatics 2015;31 19:3210-2. doi:10.1093/bioinformatics/btv351.

595 75. Elsiek CG. Finding the missing honey bee genes: lessons learned from a genome  
596 upgrade. BMC Genomics. 2014;15 86 doi:doi.org/10.1186/1471-2164-15-86.

597 76. Adams. The genome sequence of *Drosophila melanogaster*. Science. 2000.

598 77. Edgar RC. MUSCLE: multiple sequence alignment with high accuracy and high  
599 throughput. Nucleic Acids Res. 2004;32 5:1792-7. doi:10.1093/nar/gkh340.

600 78. Capella-Gutierrez S, Silla-Martinez JM and Gabaldon T. trimAl: a tool for automated  
601 alignment trimming in large-scale phylogenetic analyses. Bioinformatics. 2009;25:1972-  
602 3.

603 79. Stamatakis A. RAxML Version 8: A tool for Phylogenetic Analysis and Post-Analysis of  
604 Large Phylogenies. Bioinformatics. 2014.

605 80. Stöver BC and Müller KF. TreeGraph 2: Combining and visualizing evidence from  
606 different phylogenetic analyses. BMC bioinformatics. 2010;11 1.

1  
2  
3  
4  
5  
6  
7  
8  
9  
10  
11  
12  
13  
14  
15  
16  
17  
18  
19  
20  
21  
22  
23  
24  
25  
26  
27  
28  
29  
30  
31  
32  
33  
34  
35  
36  
37  
38  
39  
40  
41  
42  
43  
44  
45  
46  
47  
48  
49  
50  
51  
52  
53  
54  
55  
56  
57  
58  
59  
60  
61  
62  
63  
64  
65

607 81. Du L, Li D, Zhang X and Yue B. MSDB: a user-friendly program for reporting distribution  
608 and building databases of microsatellites from genome sequences. . Journal of Heredity.  
609 2013;104 1:154-7.

610 82. Li H and Durbin R. Fast and accurate short read alignment with Burrows-Wheeler  
611 Transform. Bioinformatics. 2009;25:1754-60.

612 83. McKenna A HM, Banks E, Sivachenko A, Cibulskis K, Kernysky A, Garimella K,  
613 Altshuler D, Gabriel S, Daly M, DePristo MA. The Genome Analysis Toolkit: a  
614 MapReduce framework for analyzing next-generation DNA sequencing data Genome  
615 Research. 2010;20:1297-303.

616 84. Cingolani P PA, Wang le L, Coon M, Nguyen T, Wang L, Land SJ, Lu X, Ruden DM. A  
617 program for annotating and predicting the effects of single nucleotide polymorphisms,  
618 SnpEff: SNPs in the genome of *Drosophila melanogaster* strain w1118; iso-2; iso-3.  
619 2012;6 2:80-92.

620 85. Abdel-latif M. A Family of Chemoreceptors in *Tribolium castaneum* (Tenebrionidae:  
621 Coleoptera). PLOS ONE. 2007;2 12:e1319. doi:10.1371/journal.pone.0001319.

622 86. McKenna DD, Scully ED, Pauchet Y, Hoover K, Kirsch R, Geib SM, et al. Genome of the  
623 Asian longhorned beetle (*Anoplophora glabripennis*), a globally significant invasive  
624 species, reveals key functional and evolutionary innovations at the beetle–plant  
625 interface. Genome Biology. 2016;17 1:227. doi:10.1186/s13059-016-1088-8.

626 87. Consortium TU. UniProt: the universal protein knowledgebase. Nucleic Acids Res.  
627 2017;45 D1:D158-D69. doi:10.1093/nar/gkw1099.

628 88. Kim HS, Murphy T, Xia J, Caragea D, Park Y, Beeman RW, et al. BeetleBase in 2010:  
629 revisions to provide comprehensive genomic information for *Tribolium castaneum*.  
630 Nucleic Acids Res. 2010;38:D437-D42. doi:10.1093/nar/gkp807.

1  
2  
3  
4  
5  
6  
7  
8  
9  
10  
11  
12  
13  
14  
15  
16  
17  
18  
19  
20  
21  
22  
23  
24  
25  
26  
27  
28  
29  
30  
31  
32  
33  
34  
35  
36  
37  
38  
39  
40  
41  
42  
43  
44  
45  
46  
47  
48  
49  
50  
51  
52  
53  
54  
55  
56  
57  
58  
59  
60  
61  
62  
63  
64  
65

631 89. Anisimova M and Gascuel O. Approximate likelihood-ratio test for branches: A fast,  
632 accurate, and powerful alternative. *Syst Biol.* 2006;55 4:539-52.  
633 doi:10.1080/10635150600755453.

634 90. Chevenet F, Brun C, Banuls AL, Jacq B and Christen R. TreeDyn: towards dynamic  
635 graphics and annotations for analyses of trees. *BMC Bioinformatics.* 2006;7:439.  
636 doi:10.1186/1471-2105-7-439.

637 91. Dereeper A, Guignon V, Blanc G, Audic S, Buffet S, Chevenet F, et al. Phylogeny.fr:  
638 robust phylogenetic analysis for the non-specialist. *Nucleic Acids Res.* 2008;36 Web  
639 Server issue:W465-9. doi:10.1093/nar/gkn180.

640 92. Letunic I and Bork P. Interactive Tree Of Life (iTOL): an online tool for phylogenetic tree  
641 display and annotation. *Bioinformatics.* 2007;23 1:127-8.  
642 doi:10.1093/bioinformatics/btl529.

643 93. Kumar S, Stecher G and Tamura K. MEGA7: Molecular Evolutionary Genetics Analysis  
644 version 7.0 for bigger datasets. *Molecular biology and evolution.* 2016:mw054.

645 94. Hall BG. Building Phylogenetic Trees from Molecular Data with MEGA. *Molecular  
646 Biology and Evolution.* 2013;30 5:1229-35.

647 95. Bateman A. The Pfam protein families database. *Nucleic Acids Res.* 2002;30:276-80.

648 96. Letunic I and Bork P. Interactive tree of life (iTOL) v3: an online tool for the display and  
649 annotation of phylogenetic and other trees. *Nucleic Acids Res.* 2016;44 W1:W242-W5.

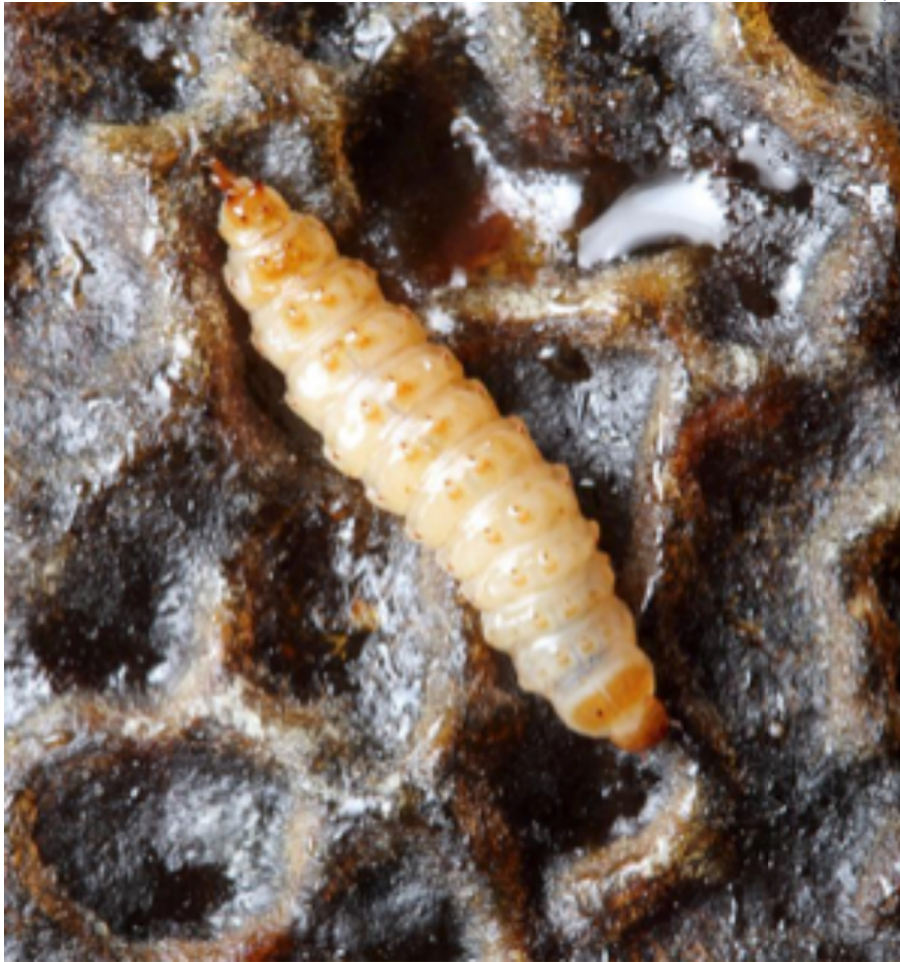

**B**

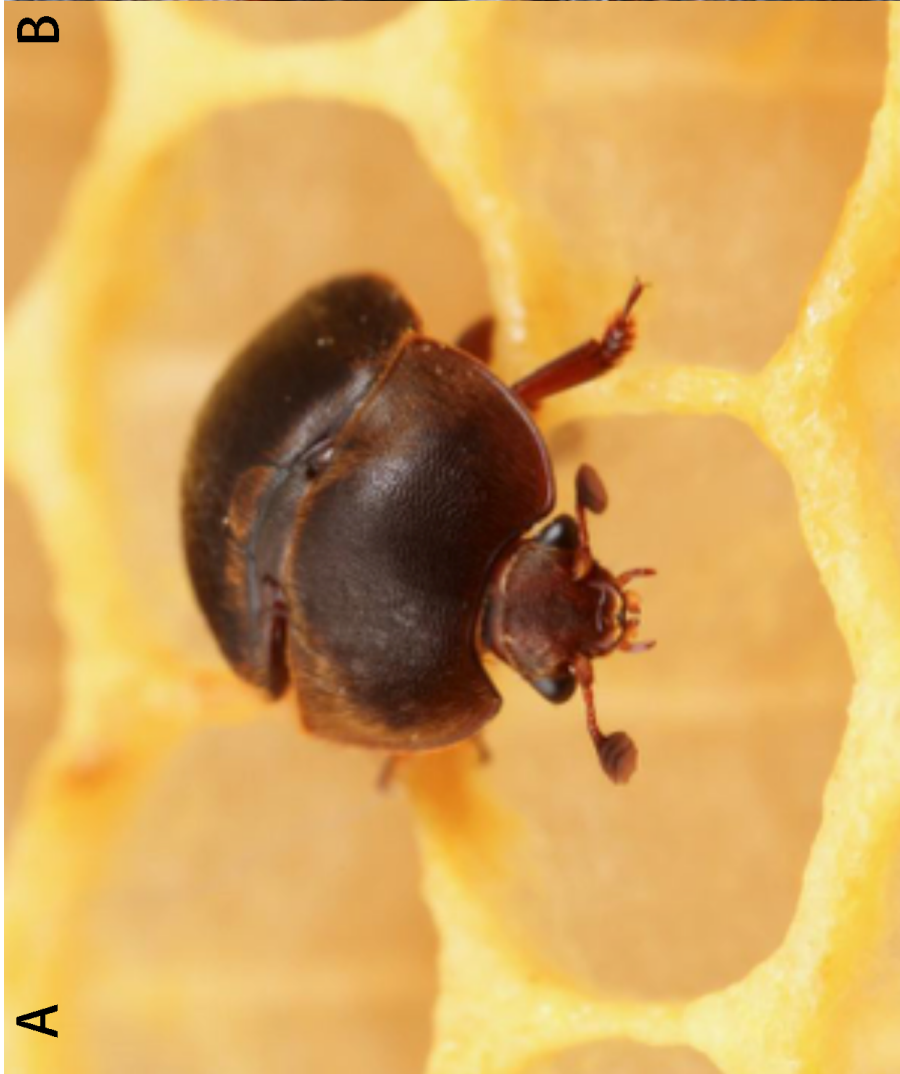

**A**

Figure 1

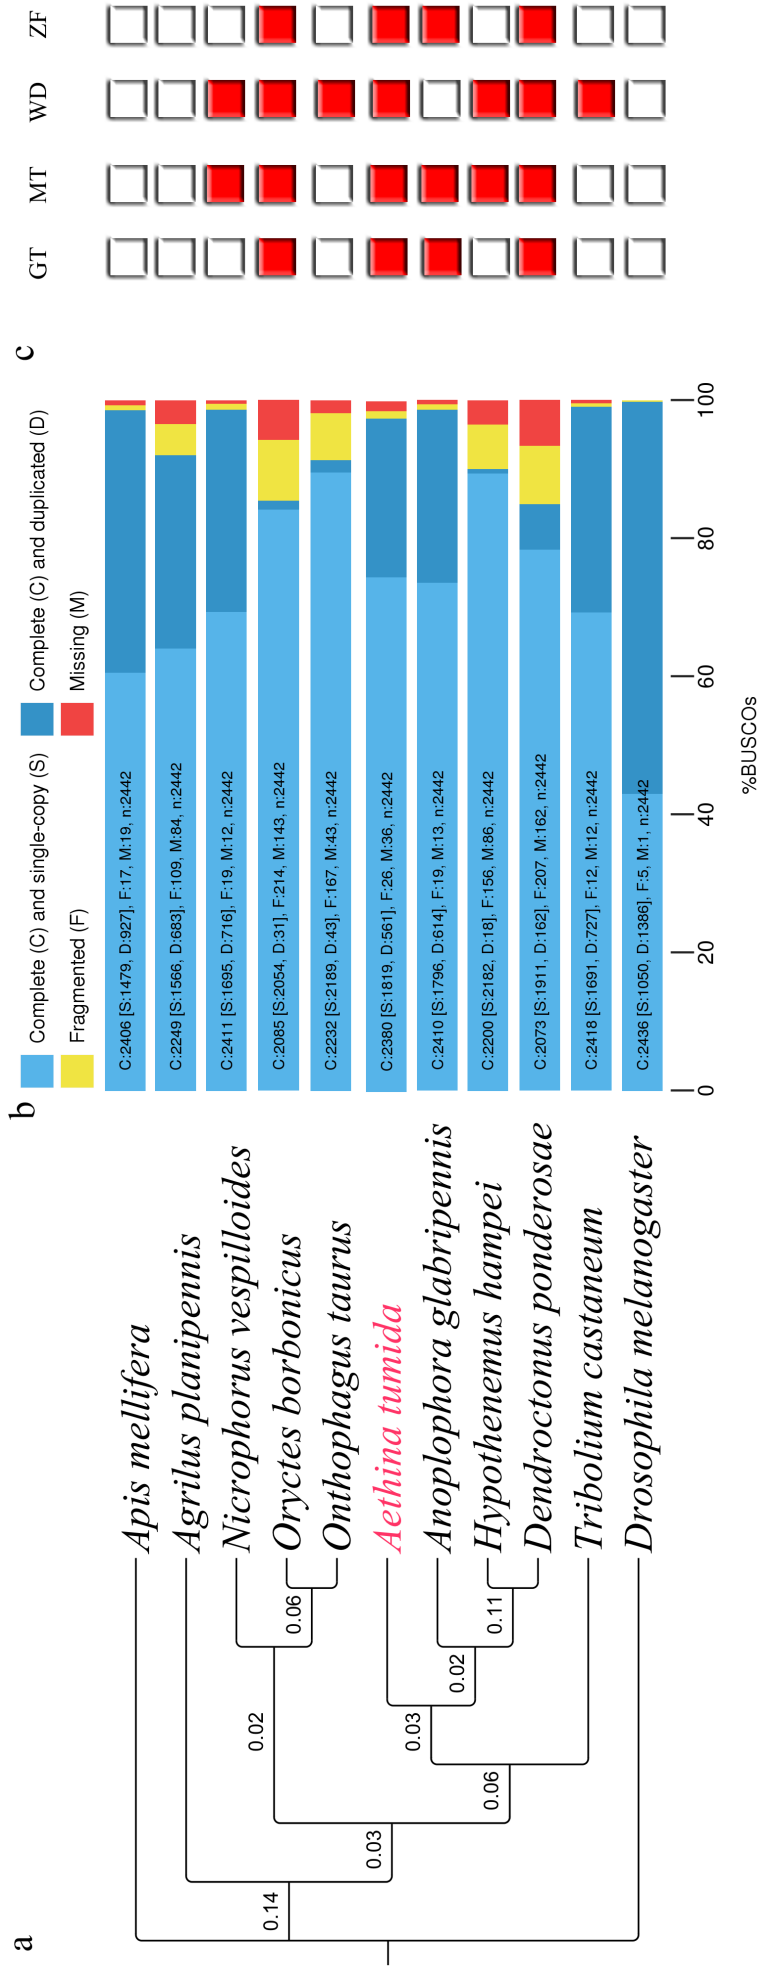

Figure 2



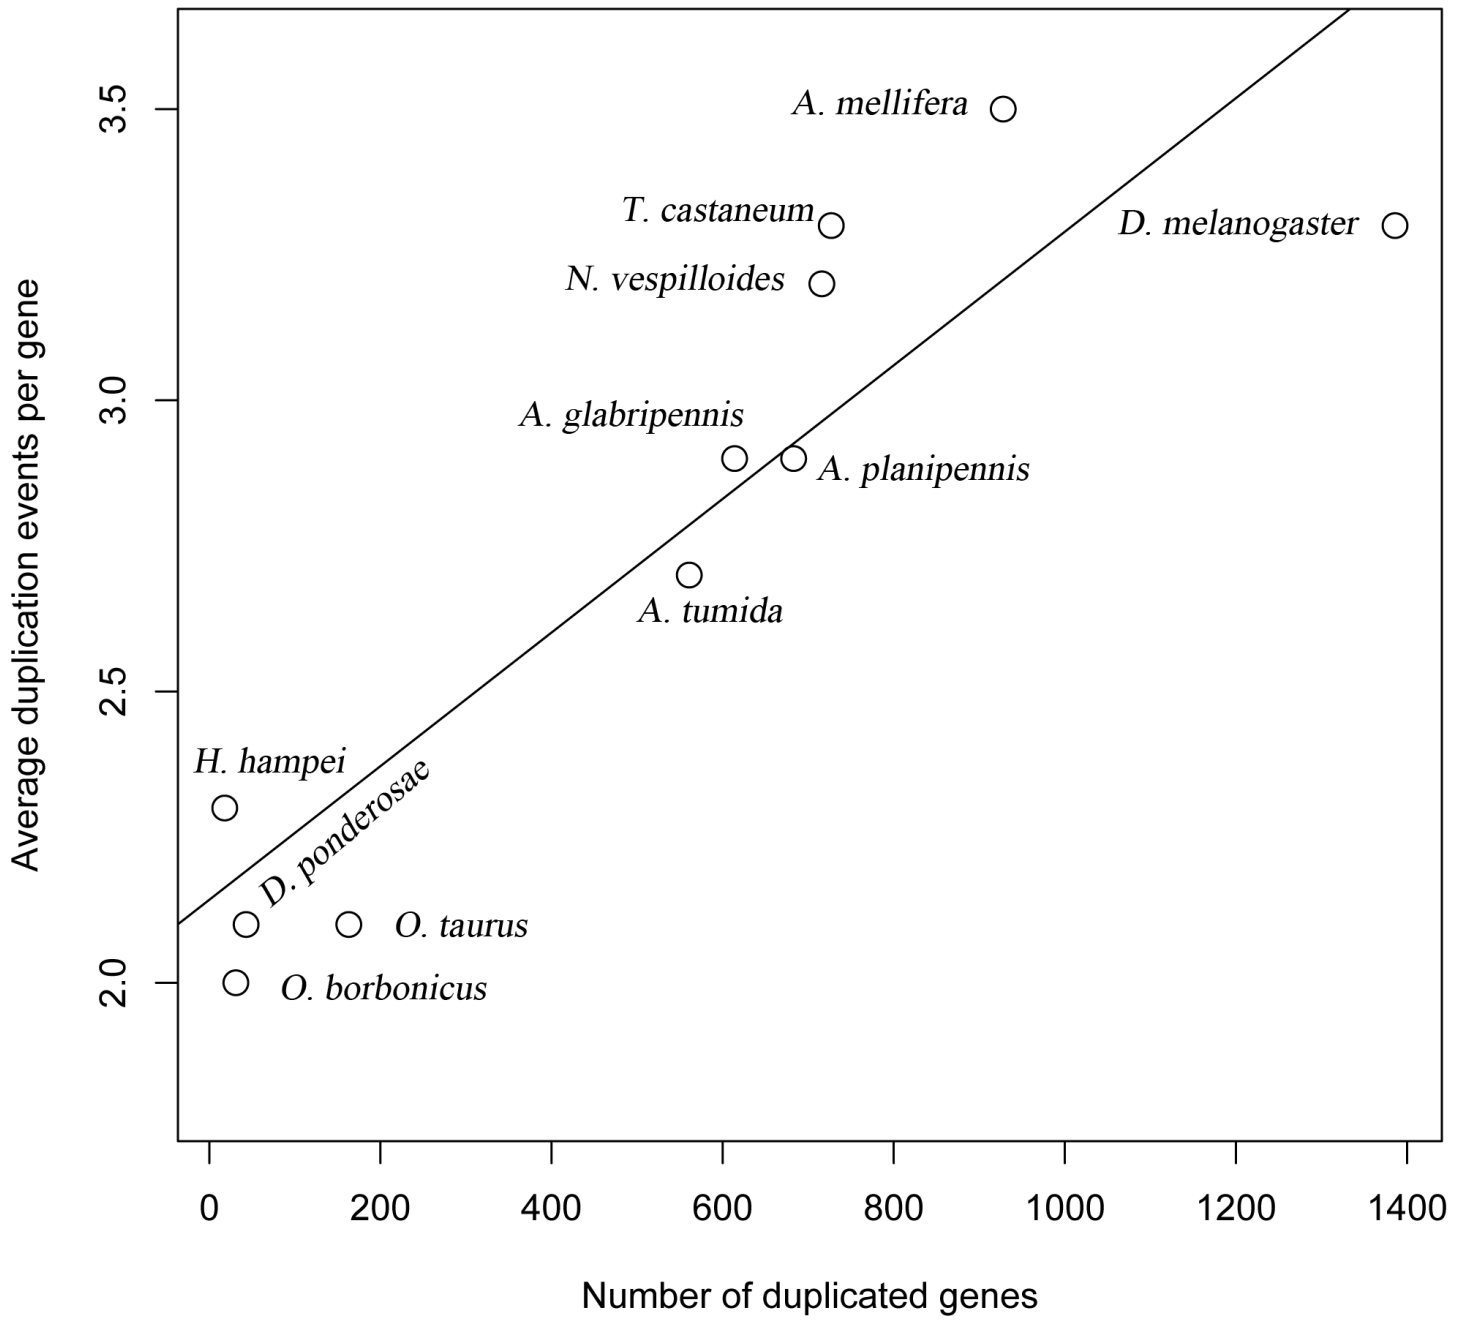

Figure 3

The dendrogram at the top of the table shows the hierarchical clustering of 32 GH families. The tree splits into two main clusters: 'Phytophagous' (left) and 'Other' (right). The 'Phytophagous' cluster includes families GH1, GH2, GH5, GH9, GH10, GH13, GH15, GH16, GH18, GH20, GH22, GH28, GH30, GH31, GH32, GH35, GH37, GH38, GH39, GH45, GH47, GH48, GH63, GH67, GH79, GH85, and GH99. The 'Other' cluster includes families GH1, GH2, GH5, GH9, GH10, GH13, GH15, GH16, GH18, GH20, GH22, GH28, GH30, GH31, GH32, GH35, GH37, GH38, GH39, GH45, GH47, GH48, GH63, GH67, GH79, GH85, and GH99.

| Family       | ALB                 | CBB        | DPOND      | NIC          | ORY       | SHB       | TCAS      |
|--------------|---------------------|------------|------------|--------------|-----------|-----------|-----------|
| GH1          | 59                  | 21         | 25         | 8            | 2         | 8         | 13        |
| GH2          | 5                   | 2          | 3          | 8            | 1         | 5         | 6         |
| GH5          | 6                   | 2          | 2          | 0            | 0         | 0         | 0         |
| GH9          | 1                   | 0          | 0          | 1            | 1         | 0         | 1         |
| GH10         | 0                   | 2          | 0          | 0            | 0         | 0         | 0         |
| GH13         | 1                   | 0          | 0          | 0            | 0         | 0         | 0         |
| GH15         | 2                   | 2          | 2          | 4            | 1         | 3         | 2         |
| GH16         | 4                   | 5          | 11         | 1            | 3         | 7         | 3         |
| GH18         | 25                  | 19         | 11         | 18           | 13        | 18        | 22        |
| GH20         | 8                   | 8          | 10         | 14           | 8         | 8         | 10        |
| GH22         | 7                   | 0          | 0          | 0            | 0         | 0         | 0         |
| GH28         | 17                  | 7          | 23         | 0            | 0         | 0         | 0         |
| GH30         | 7                   | 1          | 2          | 3            | 1         | 8         | 5         |
| GH31         | 17                  | 6          | 10         | 6            | 7         | 11        | 8         |
| GH32         | 2                   | 0          | 2          | 0            | 0         | 0         | 0         |
| GH35         | 10                  | 5          | 10         | 3            | 0         | 4         | 4         |
| GH37         | 7                   | 0          | 0          | 0            | 0         | 0         | 0         |
| GH38         | 10                  | 7          | 7          | 7            | 5         | 10        | 11        |
| GH39         | 1                   | 0          | 0          | 1            | 0         | 1         | 1         |
| GH45         | 2                   | 3          | 9          | 0            | 0         | 0         | 0         |
| GH47         | 4                   | 4          | 4          | 5            | 3         | 6         | 4         |
| GH48         | 1                   | 4          | 8          | 0            | 0         | 0         | 0         |
| GH63         | 1                   | 1          | 1          | 1            | 1         | 0         | 1         |
| GH67         | 0                   | 0          | 0          | 0            | 0         | 0         | 1         |
| GH79         | 1                   | 1          | 1          | 2            | 1         | 1         | 1         |
| GH85         | 1                   | 1          | 1          | 1            | 0         | 1         | 1         |
| GH99         | 0                   | 0          | 0          | 1            | 0         | 0         | 1         |
| <b>Total</b> | <b>199</b>          | <b>101</b> | <b>142</b> | <b>84</b>    | <b>47</b> | <b>91</b> | <b>95</b> |
|              | <b>Phytophagous</b> |            |            | <b>Other</b> |           |           |           |

Figure 4



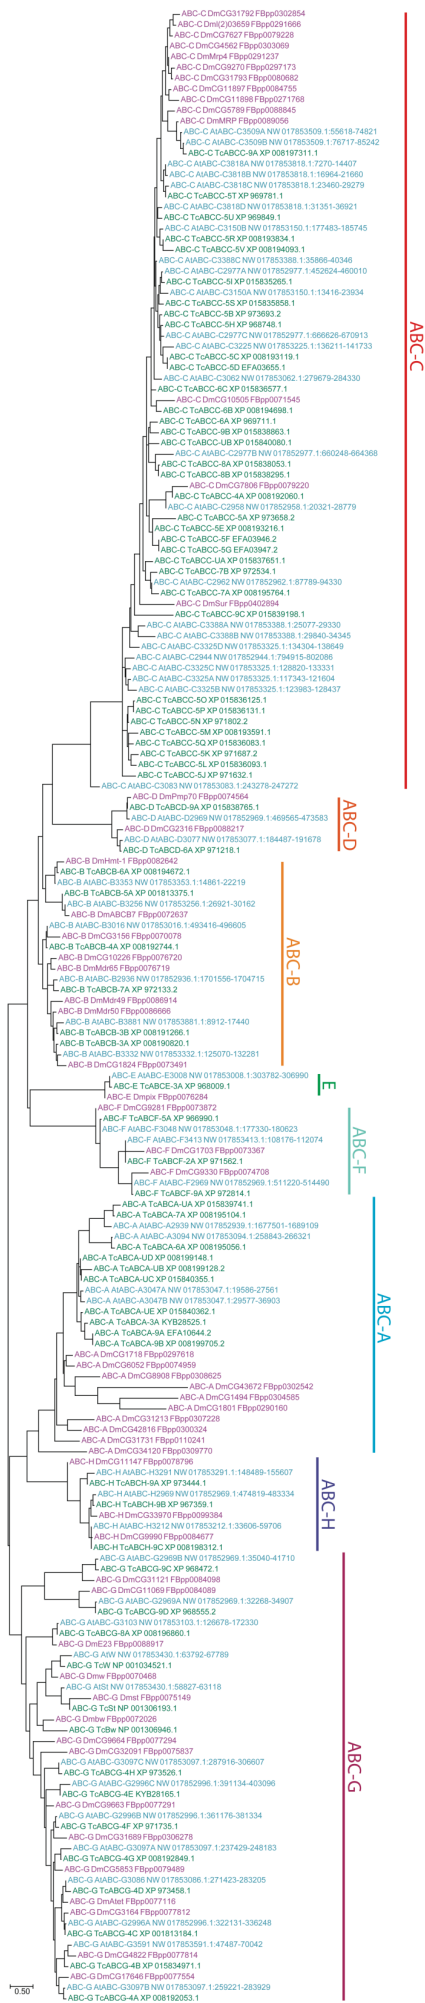

Figure 6

# COE Classification

- Clade D: Integument Esterases
- Clade E: B- and Pheromone Esterases
- Clade F: Juvenile Hormone Esterases
- Clade H: Glutatactins
- Clade I: Unknown Function
- Clade J: Acetylcholinesterases
- Clade K: Gliotactins
- Clade L: Neuroligins
- Clade M: Neurtactins

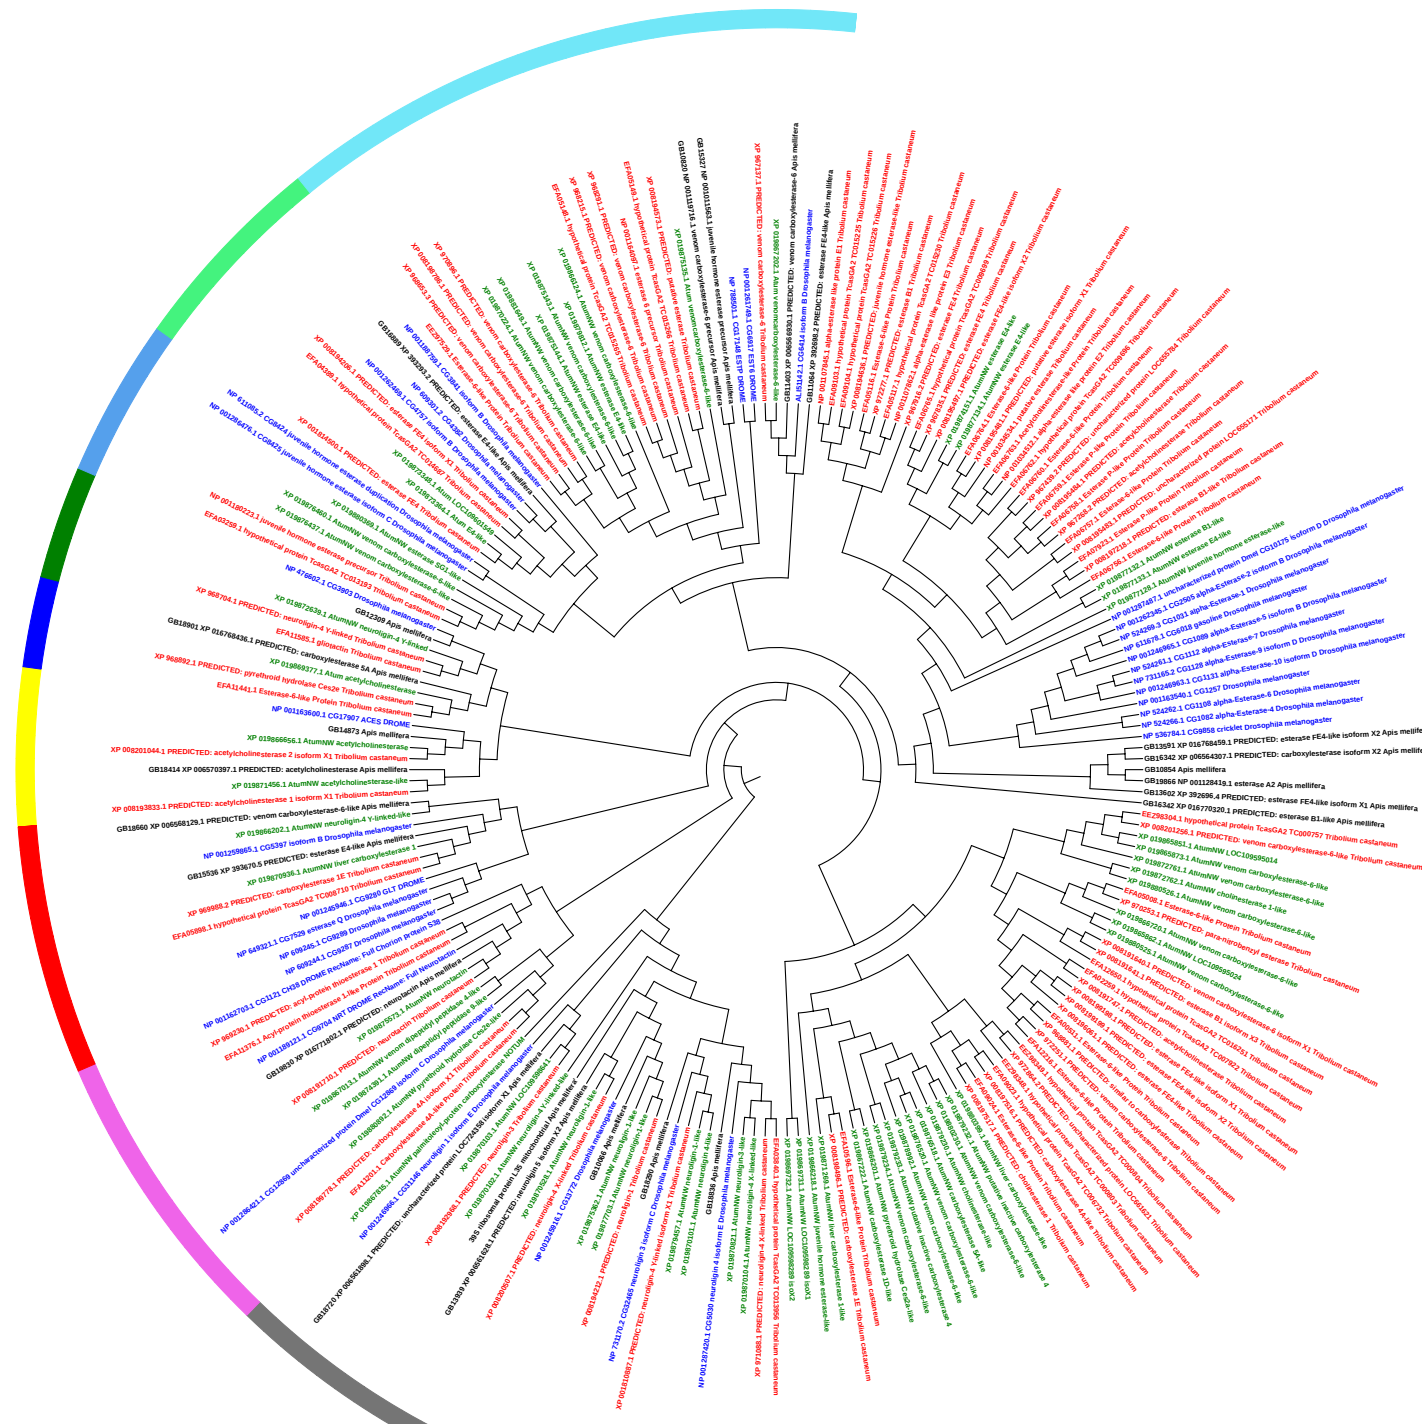

Figure 7



- GST Class**
- Delta
  - Epsilon
  - Omega
  - Sigma
  - Theta
  - Zeta
  - Microsomal
  - Unclassified

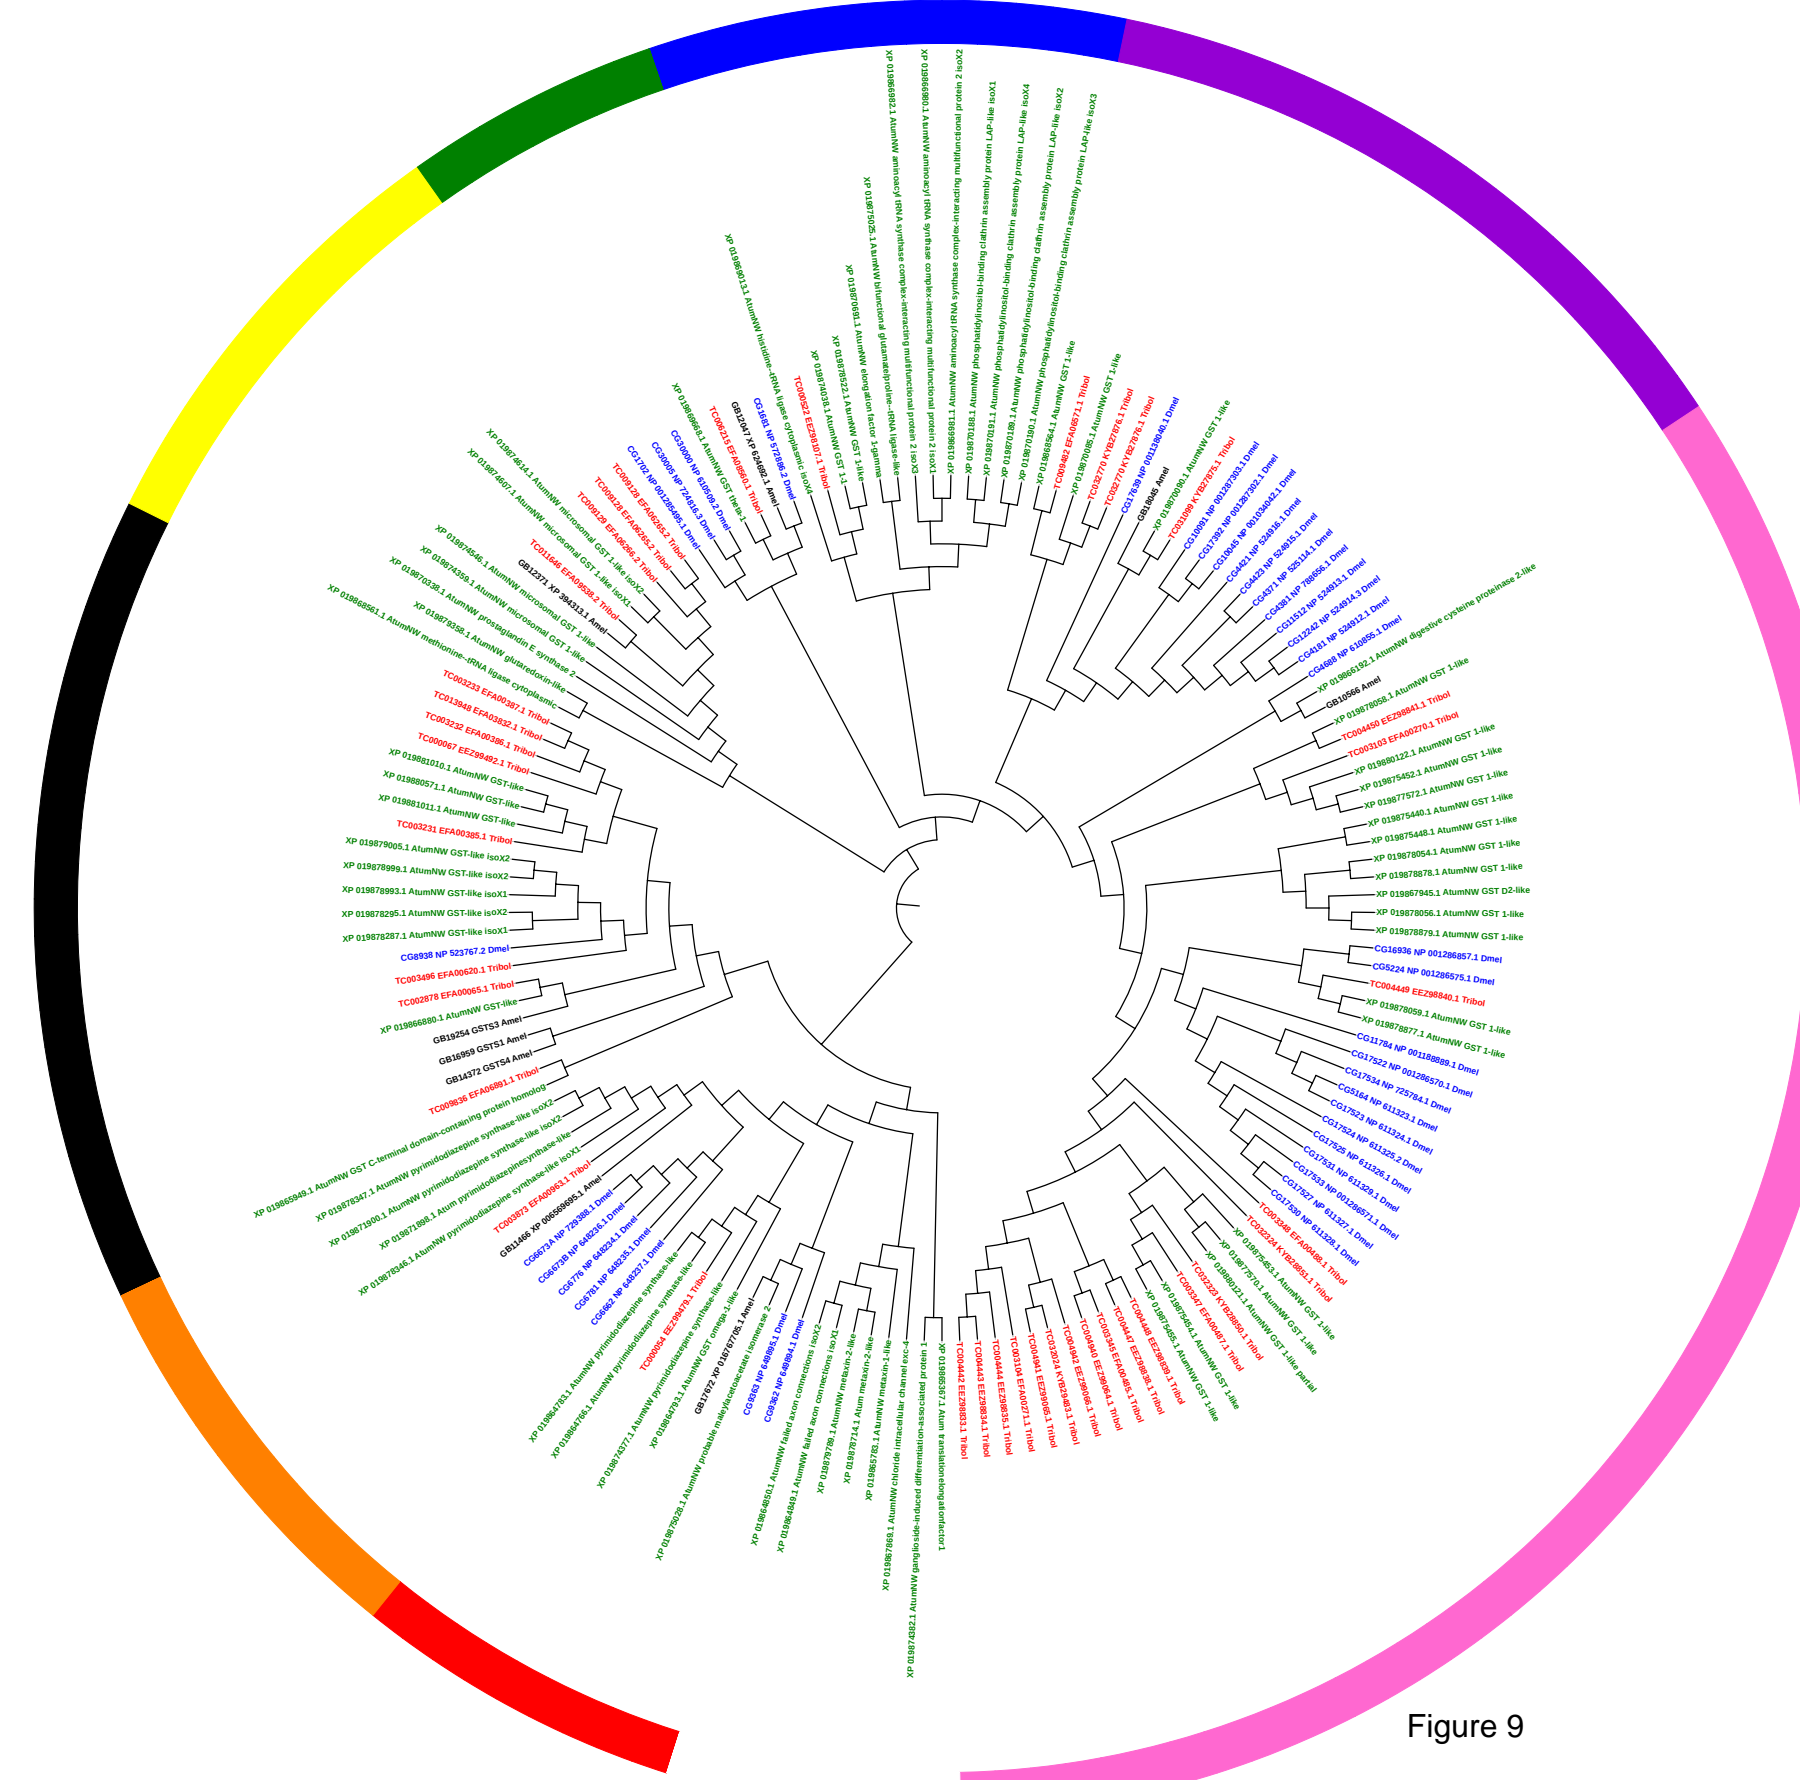

Figure 9

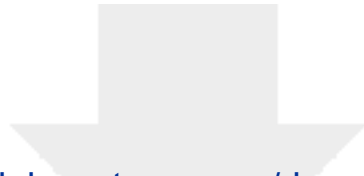

Click here to access/download  
**Supplementary Material**  
SupplementalFile3domains.xlsx

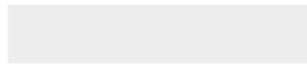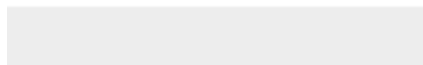



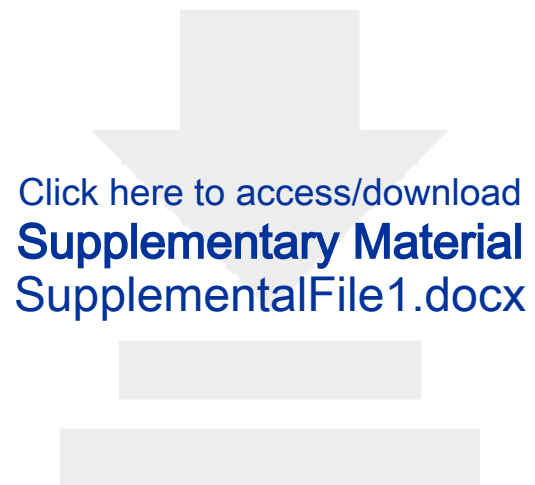

Click here to access/download  
**Supplementary Material**  
SupplementalFile1.docx



Click here to access/download  
**Supplementary Material**  
SupplementalFile2IDs.xlsx

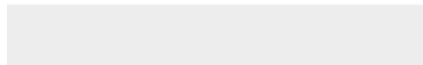

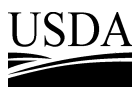**United States Department of Agriculture**Research, Education, and Economics  
Agricultural Research ServiceGigascience  
Oxford Academic Journals

2 Sept. 2018

Dear Editors,

We have attached our revised manuscript “**Genome of the small hive beetle (*Aethina tumida*, Coleoptera: Nitidulidae), a worldwide parasite of social bee colonies, provides insights into detoxification and herbivory**” that we feel is significantly improved thanks to the careful comments and critiques from the reviewers. We feel we were able to address these critiques, and hope that this improved manuscript is now suitable for publication in GigaScience. Due to the unique taxonomic position of this beetle and (most importantly) its growing impact on honey bee populations, we feel this genome, gene set, and analysis will help propel a productive set of discussions and discoveries for the biology of this parasite.

We have added substantially to the methods description in the main text to clarify the parameters behind the computational routines in this paper. We have not changed the extensive metadata (described below) for analyses and resources generated during the project and hope this is helpful for the reviewers and future readers. These resources are, we believe, still housed at GigaScience from the prior submission, although they can also be downloaded via: <https://drive.google.com/drive/folders/16YDMOzFp4Au4YjBFaIXrBZDvq6tdRICd>.

We look forward to your reply and are open again to feedback to make this an impactful paper for *GigaScience*.

Yours sincerely,

A handwritten signature in black ink, appearing to read "Jay Evans", with a long horizontal line extending to the right.

Dr. Jay D. Evans  
Research Leader USDA-ARS Bee Research Lab BARC-East Bldg. 306 Beltsville, MD 20705  
301-504-5143 (ph) 240-755-6720 (cell) [jay.evans@ars.usda.gov](mailto:jay.evans@ars.usda.gov)

1 - Genomic DNA and transcriptomic sequence data Evans et al, Small Hive Beetle

2 - assembly fasta

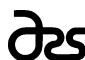Bee Research Laboratory  
Building 476, Beltsville, MD 20705

An Equal Opportunity Employer

GCF\_001937115.1\_Atum\_1.0\_genomic.fna is the genome assembly file, which is available at [ftp://ftp.ncbi.nlm.nih.gov/genomes/all/GCF/001/937/115/GCF\\_001937115.1\\_Atum\\_1.0](ftp://ftp.ncbi.nlm.nih.gov/genomes/all/GCF/001/937/115/GCF_001937115.1_Atum_1.0)

3 - coding gene annotations (GFF)

GCF\_001937115.1\_Atum\_1.0\_genomic.gff is the coding gene annotation file, which is available at [ftp://ftp.ncbi.nlm.nih.gov/genomes/all/GCF/001/937/115/GCF\\_001937115.1\\_Atum\\_1.0](ftp://ftp.ncbi.nlm.nih.gov/genomes/all/GCF/001/937/115/GCF_001937115.1_Atum_1.0)

4 - coding gene nucleotide sequences (fasta)

GCF\_001937115.1\_Atum\_1.0\_cds\_from\_genomic.fna is the coding gene nucleotides sequences, which is available at [ftp://ftp.ncbi.nlm.nih.gov/genomes/all/GCF/001/937/115/GCF\\_001937115.1\\_Atum\\_1.0](ftp://ftp.ncbi.nlm.nih.gov/genomes/all/GCF/001/937/115/GCF_001937115.1_Atum_1.0)

5 - coding gene translated sequences (protein fasta)

GCF\_001937115.1\_Atum\_1.0\_protein.faa is the protein sequences, which is available at [ftp://ftp.ncbi.nlm.nih.gov/genomes/all/GCF/001/937/115/GCF\\_001937115.1\\_Atum\\_1.0](ftp://ftp.ncbi.nlm.nih.gov/genomes/all/GCF/001/937/115/GCF_001937115.1_Atum_1.0)

6 - repeats/transposable elements/ncRNAs /other annotations (GFF)

not applicable

7 - gene /gene family alignments (multi-fasta)

sorted\_all.trim.aln is the alignment file among species of Figure 2a.

8 - phylogenetic tree files (newick)

For the species phylogenetic tree (Figure 2a), RAxML\_bestTree.treeSHB\_1000 and RAxML\_bipartitions.treeSHB\_1000 are the output files.

Figure 5: Fig5GRSeqsAlign.fas

Figure 6: Fig6\_ABCWalkerAlig.fas

Figure 7: Fig7\_ALN\_COE.fas

Figure 8: Fig8\_ALN\_P450.fas

Figure 9: Fig9\_ALN\_GST\_20180304.fas

9 - BUSCO output file(s)

All BUSCO output files are in the folder BUSCO\_output

10 - gene expression levels (fpkm values tables) if performed

not applicable

11 - SNP annotations (VCF) if performed

SHB\_annotated.vcf is the SNP annotation file

12 - any perl/python scripts used in analysis process

not applicable

13 - readme.txt including all file names with a brief description of each
