# Supplementary material for: Genome of the small hive beetle (Aethina tumida, Coleoptera: Nitidulidae), a worldwide parasite of social bee colonies, provides insights into detoxification and herbivory
Source: PubMed Central journal article supplement (PMC6302959; doi:10.1093/gigascience/giy138), 2018-12-07
Supplement: giy138_giga-d-18-00144_revision_2.pdf [file giy138_giga-d-18-00144_revision_2.pdf]

# GigaScience

## Genome of the small hive beetle (*Aethina tumida*, Coleoptera: Nitidulidae), a worldwide parasite of social bee colonies, provides insights into detoxification and herbivory --Manuscript Draft--

|                                                      |                                                                                                                                                                                                                                                                                                                                                                                                                                                                                                                                                                                                                                                                                                                                                                                                                                                                                                                                                                                                                                                                                                                                                                                                                                                                                                                                                                                                                                                                                                                                                                                                                                                                                                                                                                                                                                                                                                                                                                                    |
|------------------------------------------------------|------------------------------------------------------------------------------------------------------------------------------------------------------------------------------------------------------------------------------------------------------------------------------------------------------------------------------------------------------------------------------------------------------------------------------------------------------------------------------------------------------------------------------------------------------------------------------------------------------------------------------------------------------------------------------------------------------------------------------------------------------------------------------------------------------------------------------------------------------------------------------------------------------------------------------------------------------------------------------------------------------------------------------------------------------------------------------------------------------------------------------------------------------------------------------------------------------------------------------------------------------------------------------------------------------------------------------------------------------------------------------------------------------------------------------------------------------------------------------------------------------------------------------------------------------------------------------------------------------------------------------------------------------------------------------------------------------------------------------------------------------------------------------------------------------------------------------------------------------------------------------------------------------------------------------------------------------------------------------------|
| <b>Manuscript Number:</b>                            | GIGA-D-18-00144R2                                                                                                                                                                                                                                                                                                                                                                                                                                                                                                                                                                                                                                                                                                                                                                                                                                                                                                                                                                                                                                                                                                                                                                                                                                                                                                                                                                                                                                                                                                                                                                                                                                                                                                                                                                                                                                                                                                                                                                  |
| <b>Full Title:</b>                                   | Genome of the small hive beetle ( <i>Aethina tumida</i> , Coleoptera: Nitidulidae), a worldwide parasite of social bee colonies, provides insights into detoxification and herbivory                                                                                                                                                                                                                                                                                                                                                                                                                                                                                                                                                                                                                                                                                                                                                                                                                                                                                                                                                                                                                                                                                                                                                                                                                                                                                                                                                                                                                                                                                                                                                                                                                                                                                                                                                                                               |
| <b>Article Type:</b>                                 | Research                                                                                                                                                                                                                                                                                                                                                                                                                                                                                                                                                                                                                                                                                                                                                                                                                                                                                                                                                                                                                                                                                                                                                                                                                                                                                                                                                                                                                                                                                                                                                                                                                                                                                                                                                                                                                                                                                                                                                                           |
| <b>Funding Information:</b>                          |                                                                                                                                                                                                                                                                                                                                                                                                                                                                                                                                                                                                                                                                                                                                                                                                                                                                                                                                                                                                                                                                                                                                                                                                                                                                                                                                                                                                                                                                                                                                                                                                                                                                                                                                                                                                                                                                                                                                                                                    |
| <b>Abstract:</b>                                     | <p><b>Background:</b> The small hive beetle (<i>Aethina tumida</i>, ATUMI) is an invasive parasite of bee colonies. ATUMI feeds on both fruits and bee nest products, facilitating its spread and increasing its impact on honey bees and other pollinators. We have sequenced and annotated the ATUMI genome, providing the first genomic resources for this species and for the Nitidulidae, a beetle family that is closely related to the extraordinarily species-rich clade of beetles known as the Phytophaga. ATUMI thus provides a contrasting view as a neighbor for one of the most successful known animal groups.</p> <p><b>Results:</b> We present a robust genome assembly and a gene set possessing 97.5% of the core proteins known from the holometabolous insects. The ATUMI genome encodes fewer enzymes for plant digestion than the genomes of wood-feeding beetles, but nonetheless shows signs of broad metabolic plasticity. Gustatory receptors are few in number compared to other beetles, especially receptors with known sensitivity (in other beetles) to bitter substances. In contrast, several gene families implicated in detoxification of insecticides and adaptation to diverse dietary resources show increased copy numbers. The presence and diversity of homologs involved in detoxification differs substantially from the bee hosts of ATUMI.</p> <p><b>Conclusions:</b> Our results provide new insights into the genomic basis for local adaption and invasiveness in ATUMI, and a blueprint for control strategies that target this pest without harming their honey bee hosts. A minimal set of gustatory receptors is consistent with the observation that, once a host colony is invaded, food resources are predictable. Unique detoxification pathways and pathway members can help identify which treatments might control this species even in the presence of honey bees, which are notoriously sensitive to pesticides.</p> |
| <b>Corresponding Author:</b>                         | Jay D Evans, PhD<br>USDA Agricultural Research Service<br>Beltsville, MD UNITED STATES                                                                                                                                                                                                                                                                                                                                                                                                                                                                                                                                                                                                                                                                                                                                                                                                                                                                                                                                                                                                                                                                                                                                                                                                                                                                                                                                                                                                                                                                                                                                                                                                                                                                                                                                                                                                                                                                                             |
| <b>Corresponding Author Secondary Information:</b>   |                                                                                                                                                                                                                                                                                                                                                                                                                                                                                                                                                                                                                                                                                                                                                                                                                                                                                                                                                                                                                                                                                                                                                                                                                                                                                                                                                                                                                                                                                                                                                                                                                                                                                                                                                                                                                                                                                                                                                                                    |
| <b>Corresponding Author's Institution:</b>           | USDA Agricultural Research Service                                                                                                                                                                                                                                                                                                                                                                                                                                                                                                                                                                                                                                                                                                                                                                                                                                                                                                                                                                                                                                                                                                                                                                                                                                                                                                                                                                                                                                                                                                                                                                                                                                                                                                                                                                                                                                                                                                                                                 |
| <b>Corresponding Author's Secondary Institution:</b> |                                                                                                                                                                                                                                                                                                                                                                                                                                                                                                                                                                                                                                                                                                                                                                                                                                                                                                                                                                                                                                                                                                                                                                                                                                                                                                                                                                                                                                                                                                                                                                                                                                                                                                                                                                                                                                                                                                                                                                                    |
| <b>First Author:</b>                                 | Jay D Evans, PhD                                                                                                                                                                                                                                                                                                                                                                                                                                                                                                                                                                                                                                                                                                                                                                                                                                                                                                                                                                                                                                                                                                                                                                                                                                                                                                                                                                                                                                                                                                                                                                                                                                                                                                                                                                                                                                                                                                                                                                   |
| <b>First Author Secondary Information:</b>           |                                                                                                                                                                                                                                                                                                                                                                                                                                                                                                                                                                                                                                                                                                                                                                                                                                                                                                                                                                                                                                                                                                                                                                                                                                                                                                                                                                                                                                                                                                                                                                                                                                                                                                                                                                                                                                                                                                                                                                                    |
| <b>Order of Authors:</b>                             | Jay D Evans, PhD<br>Duane D McKenna, PhD<br>Erin D Scully<br>Steven C Cook<br>Benjamin Dainat<br>Noble Egekwu<br>Nathaniel Grubbs                                                                                                                                                                                                                                                                                                                                                                                                                                                                                                                                                                                                                                                                                                                                                                                                                                                                                                                                                                                                                                                                                                                                                                                                                                                                                                                                                                                                                                                                                                                                                                                                                                                                                                                                                                                                                                                  |

|                                                                               |                                                                                                                                                                                                                                                                                                                                                                                                                                                                                                                                                                                                                                                                                                                                                                                                                                                                                                                                                                                                                                                                                                                                                                                                                                                                                                                                                                                                                                                                                                                                                                                                                                                                                                                                                                                                                                                                                        |
|-------------------------------------------------------------------------------|----------------------------------------------------------------------------------------------------------------------------------------------------------------------------------------------------------------------------------------------------------------------------------------------------------------------------------------------------------------------------------------------------------------------------------------------------------------------------------------------------------------------------------------------------------------------------------------------------------------------------------------------------------------------------------------------------------------------------------------------------------------------------------------------------------------------------------------------------------------------------------------------------------------------------------------------------------------------------------------------------------------------------------------------------------------------------------------------------------------------------------------------------------------------------------------------------------------------------------------------------------------------------------------------------------------------------------------------------------------------------------------------------------------------------------------------------------------------------------------------------------------------------------------------------------------------------------------------------------------------------------------------------------------------------------------------------------------------------------------------------------------------------------------------------------------------------------------------------------------------------------------|
|                                                                               | Dawn Lopez                                                                                                                                                                                                                                                                                                                                                                                                                                                                                                                                                                                                                                                                                                                                                                                                                                                                                                                                                                                                                                                                                                                                                                                                                                                                                                                                                                                                                                                                                                                                                                                                                                                                                                                                                                                                                                                                             |
|                                                                               | Marce D Lorenzen                                                                                                                                                                                                                                                                                                                                                                                                                                                                                                                                                                                                                                                                                                                                                                                                                                                                                                                                                                                                                                                                                                                                                                                                                                                                                                                                                                                                                                                                                                                                                                                                                                                                                                                                                                                                                                                                       |
|                                                                               | Steven M Reyna                                                                                                                                                                                                                                                                                                                                                                                                                                                                                                                                                                                                                                                                                                                                                                                                                                                                                                                                                                                                                                                                                                                                                                                                                                                                                                                                                                                                                                                                                                                                                                                                                                                                                                                                                                                                                                                                         |
|                                                                               | Frank D Rinkevich                                                                                                                                                                                                                                                                                                                                                                                                                                                                                                                                                                                                                                                                                                                                                                                                                                                                                                                                                                                                                                                                                                                                                                                                                                                                                                                                                                                                                                                                                                                                                                                                                                                                                                                                                                                                                                                                      |
|                                                                               | Peter Neumann                                                                                                                                                                                                                                                                                                                                                                                                                                                                                                                                                                                                                                                                                                                                                                                                                                                                                                                                                                                                                                                                                                                                                                                                                                                                                                                                                                                                                                                                                                                                                                                                                                                                                                                                                                                                                                                                          |
|                                                                               | Qiang Huang                                                                                                                                                                                                                                                                                                                                                                                                                                                                                                                                                                                                                                                                                                                                                                                                                                                                                                                                                                                                                                                                                                                                                                                                                                                                                                                                                                                                                                                                                                                                                                                                                                                                                                                                                                                                                                                                            |
| <b>Order of Authors Secondary Information:</b>                                |                                                                                                                                                                                                                                                                                                                                                                                                                                                                                                                                                                                                                                                                                                                                                                                                                                                                                                                                                                                                                                                                                                                                                                                                                                                                                                                                                                                                                                                                                                                                                                                                                                                                                                                                                                                                                                                                                        |
| <b>Response to Reviewers:</b>                                                 | <p>Reviewer reports:<br/> Reviewer #1: I think they authors did an acceptable job addressing my comments. I only have further minor editorial comments.</p> <p>Comments:</p> <p>I do not see where overall gene compliment completeness is mentioned in the abstract.</p> <p>Minor Comments:</p> <p>Abstract - Introduction of abbreviation before Latin name sees odd.</p> <p>We corrected this in the first line of the introduction so that now both mentions of ATUMI follow the latin name that generated this acronym</p> <p>"... size of the ATUMI genome assembly [is] larger ..."</p> <p>fixed</p> <p>Orthologous group numbers need commas to be consistent with rest of paper.<br/> fixed</p> <p>Reference 17 - The potato beetle genome is now published.<br/> fixed</p> <p>Reviewer #2: The authors have addressed most comments raised by the reviewers. The manuscript has been significantly improved. However, the authors did not revise the manuscript as what they said in the replies to the comments. Here are two examples. 1) the authors mentioned "we have added our BUSCO/completeness parameters as part of the abstract, we feel the captured genes in this analysis are complete and allow for the arguments for gene loss, duplication, etc.". However, I did not find it in the revised abstract. 2) In reply to "Line 164. 2444 needs a comma to be consistent with other number in manuscript." the authors said "fixed". However, no comma found in 2444 and other figures in the revised manuscript (Page 8 line 4 -line 10). The authors should carefully revise the manuscript.</p> <p>Hi we are sorry, we had corrected most of the commas in numbers but missed some, and should be complete now, as is the addition of BUSCO estimates to the abstract. We have also checked to make sure additional comments were addressed as promised.</p> |
| <b>Additional Information:</b>                                                |                                                                                                                                                                                                                                                                                                                                                                                                                                                                                                                                                                                                                                                                                                                                                                                                                                                                                                                                                                                                                                                                                                                                                                                                                                                                                                                                                                                                                                                                                                                                                                                                                                                                                                                                                                                                                                                                                        |
| <b>Question</b>                                                               | <b>Response</b>                                                                                                                                                                                                                                                                                                                                                                                                                                                                                                                                                                                                                                                                                                                                                                                                                                                                                                                                                                                                                                                                                                                                                                                                                                                                                                                                                                                                                                                                                                                                                                                                                                                                                                                                                                                                                                                                        |
| Are you submitting this manuscript to a special series or article collection? | No                                                                                                                                                                                                                                                                                                                                                                                                                                                                                                                                                                                                                                                                                                                                                                                                                                                                                                                                                                                                                                                                                                                                                                                                                                                                                                                                                                                                                                                                                                                                                                                                                                                                                                                                                                                                                                                                                     |
| <b>Experimental design and statistics</b>                                     | Yes                                                                                                                                                                                                                                                                                                                                                                                                                                                                                                                                                                                                                                                                                                                                                                                                                                                                                                                                                                                                                                                                                                                                                                                                                                                                                                                                                                                                                                                                                                                                                                                                                                                                                                                                                                                                                                                                                    |
| Full details of the experimental design and                                   |                                                                                                                                                                                                                                                                                                                                                                                                                                                                                                                                                                                                                                                                                                                                                                                                                                                                                                                                                                                                                                                                                                                                                                                                                                                                                                                                                                                                                                                                                                                                                                                                                                                                                                                                                                                                                                                                                        |

|                                                                                                                                                                                                                                                                                                                                                                                                                                                                                                                                                         |            |
|---------------------------------------------------------------------------------------------------------------------------------------------------------------------------------------------------------------------------------------------------------------------------------------------------------------------------------------------------------------------------------------------------------------------------------------------------------------------------------------------------------------------------------------------------------|------------|
| <p>statistical methods used should be given in the Methods section, as detailed in our <a href="#">Minimum Standards Reporting Checklist</a>. Information essential to interpreting the data presented should be made available in the figure legends.</p> <p>Have you included all the information requested in your manuscript?</p>                                                                                                                                                                                                                   |            |
| <p><b>Resources</b></p> <p>A description of all resources used, including antibodies, cell lines, animals and software tools, with enough information to allow them to be uniquely identified, should be included in the Methods section. Authors are strongly encouraged to cite <a href="#">Research Resource Identifiers</a> (RRIDs) for antibodies, model organisms and tools, where possible.</p> <p>Have you included the information requested as detailed in our <a href="#">Minimum Standards Reporting Checklist</a>?</p>                     | <p>Yes</p> |
| <p><b>Availability of data and materials</b></p> <p>All datasets and code on which the conclusions of the paper rely must be either included in your submission or deposited in <a href="#">publicly available repositories</a> (where available and ethically appropriate), referencing such data using a unique identifier in the references and in the “Availability of Data and Materials” section of your manuscript.</p> <p>Have you have met the above requirement as detailed in our <a href="#">Minimum Standards Reporting Checklist</a>?</p> | <p>Yes</p> |

[Click here to view linked References](#)

1  
2  
3  
4  
5  
6  
7  
8  
9  
10  
11  
12  
13  
14  
15  
16  
17  
18  
19  
20  
21  
22  
23  
24  
25  
26  
27  
28  
29  
30  
31  
32  
33  
34  
35  
36  
37  
38  
39  
40  
41  
42  
43  
44  
45  
46  
47  
48  
49  
50  
51  
52  
53  
54  
55  
56  
57  
58  
59  
60  
61  
62  
63  
64  
65

1 **Genome of the small hive beetle (*Aethina tumida*, Coleoptera: Nitidulidae), a**  
2 **worldwide parasite of social bee colonies, provides insights into detoxification and**  
3 **herbivory**

4  
5 Jay D. Evans<sup>1\*</sup>, Duane McKenna<sup>2</sup>, Erin Scully<sup>3</sup>, Steven C. Cook<sup>1</sup>, Benjamin Dainat<sup>4</sup>, Noble  
6 Egekwu<sup>1</sup>, Nathaniel Grubbs<sup>5</sup>, Dawn Lopez<sup>1</sup>, Marcé D. Lorenzen<sup>5</sup>, Steven M. Reyna<sup>5</sup>,  
7 Frank D. Rinkevich<sup>6</sup>, Peter Neumann<sup>7</sup>, Qiang Huang<sup>7,8\*</sup>

8  
9 <sup>1</sup>USDA-ARS, Bee Research Laboratory, BARC-East Building 306, Beltsville, Maryland  
10 20705, USA

11 <sup>2</sup>Department of Biological Sciences, University of Memphis, 3700 Walker Ave., Memphis,  
12 TN 38152, USA

13 <sup>3</sup>USDA-ARS, Center for Grain and Animal Health, Stored Product Insect and Engineering  
14 Research Unit, Manhattan, KS 66502, USA

15 <sup>4</sup>Agroscope, Swiss Bee Research Center, CH-3003 Bern, Switzerland

16 <sup>5</sup>Department of Entomology and Plant Pathology, North Carolina State University, 1566  
17 Thomas Hall, Raleigh, NC 27695, USA

18 <sup>6</sup>USDA, Honey Bee Breeding, Genetics and Physiology Laboratory, 1157 Ben Hur Road,  
19 Baton Rouge, LA 70820, USA

20 <sup>7</sup>Institute of Bee Health, Vetsuisse Faculty, University of Bern, Schwarzenburgstrasse  
21 161, CH-3097, Liebefeld, Switzerland

22 <sup>8</sup>Honey Bee Research Institute, Jiangxi Agricultural University, Zhimin Avenue 1101,  
23 330045 Nanchang, China

24  
25 \* For correspondence

26 Email: Jay.Evans@ARS.USDA.GOV (JDE); qiang-huang@live.com (QH)

1  
2  
3  
4  
5  
6  
7  
8  
9  
10  
11  
12  
13  
14  
15  
16  
17  
18  
19  
20  
21  
22  
23  
24  
25  
26  
27  
28  
29  
30  
31  
32  
33  
34  
35  
36  
37  
38  
39  
40  
41  
42  
43  
44  
45  
46  
47  
48  
49  
50  
51  
52  
53  
54  
55  
56  
57  
58  
59  
60  
61  
62  
63  
64  
65

27  
28  
29  
30  
31  
32  
33  
34  
35  
36  
37  
38  
39  
40  
41  
42  
43  
44  
45  
46  
47  
48  
49  
50  
51  
52

**Abstract**

**Background:** The small hive beetle (*Aethina tumida*, ATUMI) is an invasive parasite of bee colonies. ATUMI feeds on both fruits and bee nest products, facilitating its spread and increasing its impact on honey bees and other pollinators. We have sequenced and annotated the ATUMI genome, providing the first genomic resources for this species and for the Nitidulidae, a beetle family that is closely related to the extraordinarily species-rich clade of beetles known as the Phytophaga. ATUMI thus provides a contrasting view as a neighbor for one of the most successful known animal groups.

**Results:** We present a robust genome assembly and a gene set possessing 97.5% of the core proteins known from the holometabolous insects. The ATUMI genome encodes fewer enzymes for plant digestion than the genomes of wood-feeding beetles, but nonetheless shows signs of broad metabolic plasticity. Gustatory receptors are few in number compared to other beetles, especially receptors with known sensitivity (in other beetles) to bitter substances. In contrast, several gene families implicated in detoxification of insecticides and adaptation to diverse dietary resources show increased copy numbers. The presence and diversity of homologs involved in detoxification differs substantially from the bee hosts of ATUMI.

**Conclusions:** Our results provide new insights into the genomic basis for local adaption and invasiveness in ATUMI, and a blueprint for control strategies that target this pest without harming their honey bee hosts. A minimal set of gustatory receptors is consistent with the observation that, once a host colony is invaded, food resources are predictable. Unique detoxification pathways and pathway members can help identify which treatments might control this species even in the presence of honey bees, which are notoriously sensitive to pesticides.

1  
2  
3  
4 53 **Keywords:** Coleoptera, pollination, *Apis mellifera*, invasive pest, phytophagy, glycoside  
5  
6 54 hydrolase.  
7

8  
9 55

## 10 56 **Introduction**

11  
12  
13 57 The small hive beetle (*Aethina tumida* Coleoptera: Nitidulidae, Murray, 1867, = ATUMI) is  
14  
15 58 a rapidly spreading invasive species originating from sub-Saharan Africa. ATUMI is now  
16  
17 59 found on all continents except Antarctica [1-4]. Outside of its endemic range, it has  
18  
19 60 become an economically important parasite of social bee colonies, including honey bees,  
20  
21 61 bumblebees and stingless bees [2] (Figure 1). ATUMI significantly impacts beekeeping  
22  
23 62 and the regulation of honey bees and hive products worldwide. ATUMI eggs are laid within  
24  
25 63 colonies and developing larvae feed until they leave the colony for pupation [2]. ATUMI  
26  
27 64 pupate in the soil then emerge as adults to infest social bee nests. Once inside the bee  
28  
29 65 nest, adult ATUMI employ a “sit-and-wait” strategy, relying on the resources of the nest  
30  
31 66 for nutrition and shelter until options for successful reproduction arise [2]. ATUMI larvae  
32  
33 67 and adults can feed on a large variety of food sources inside and outside of social bee  
34  
35 68 colonies, including fruits, meat, adult bees, bee brood and bee food stores (pollen and  
36  
37 69 honey) [1, 5, 6]. Beetles and their bee hosts show an elaborate set of interactions. For  
38  
39 70 example, honey bees attempt to confine adult ATUMI to prisons built from plant resins [6]  
40  
41 71 and beetles can also manipulate guard bees to obtain food by rubbing their antennae  
42  
43 72 against the guarding bees’ mandibles, inducing them to regurgitate food.  
44  
45  
46  
47

48  
49 73 ATUMI belongs to the beetle family Nitidulidae (sap beetles; c. 4,500 species),  
50  
51 74 which feed mainly on decaying vegetable matter, over-ripe fruit, or sap. The Nitidulidae  
52  
53 75 belong to the superfamily Cucujoidea (sap, bark and fungus beetles), which is either the  
54  
55 76 sister-group of the Phytophaga (leaf beetles, weevils, longhorned beetles and their  
56  
57 77 relatives; [7], the most species rich radiation of plant-feeding animals on Earth with  
58  
59 78 >125,000 described species), or forms a paraphyletic clade subtending the Phytophaga  
60  
61  
62

1  
2  
3  
4 79 [8, 9]. In the latter case, the Phytophaga are derived from within Cucujoidea. Interestingly,  
5  
6 80 the trophic habits of Nitidulidae may therefore represent a transitional stage from  
7  
8 81 fungivory, saprophagy, and detritivory (the typical habit(s) of most Cucujoidea and its  
9  
10 82 containing clade, series Cucujiformia) to phytophagy (feeding on plants), the typical  
11  
12 83 trophic habit of Phytophaga. Comparative studies of the ATUMI genome may therefore  
13  
14 84 provide new insights into the evolution and genomic basis of phytophagy in beetles.  
15  
16

17  
18 85 To date, just 10 beetle genome assemblies have been released [10], of which only 7  
19  
20 86 are published, despite there being >400,000 described beetle species. These are:  
21  
22 87 *Tribolium castaneum* (red flour beetle, TCAST; Tenebrionoidea: Tenebrionidae:  
23  
24 88 Tenebrioninae; [11], *Anoplophora glabripennis* (Asian longhorned beetle, AGLAB;  
25  
26 89 Chrysomeloidea: Cerambycidae: Lamiinae; [12]), *Dendroctonus ponderosae* (mountain  
27  
28 90 pine beetle, DPOND; Curculionoidea: Curculionidae: Scolytinae; [13]), *Hypothenemus*  
29  
30 91 *hampei* (coffee berry borer beetle, HHAMP; Curculionoidea: Curculionidae: Scolytinae;  
31  
32 92 [14]), *Oryctes borbonicus* (Reunion Island scarab beetle, OBORB; Scarabaeoidea:  
33  
34 93 Scarabaeidae: Dynastinae; [15]), *Onthophagus taurus* (bull headed dung beetle, OTAUR;  
35  
36 94 Scarabaeoidea: Scarabaeidae: Scarabaeinae; Unpublished), *Nicrophorus vespilloides*  
37  
38 95 (burying beetle, NVESP; Staphylinoidea: Silphidae: Silphinae; [16]), *Agrilus planipennis*  
39  
40 96 (emerald ash borer, APLAN; Buprestoidea: Buprestidae: Agrilinae; Unpublished),  
41  
42 97 *Leptinotarsa decemlineata* (Colorado potato beetle, LDECE; Chrysomelidae:  
43  
44 98 Chrysomelinae: Doryphorini; [17]), and *Pogonus chalceus* (salt marsh beetle, PCHAL;  
45  
46 99 Carabidae: Trechinae: Pogonini; Unpublished). The ATUMI genome described here joins  
47  
48  
49  
50  
51 100 this group as the only representative from the superfamily Cucujoidea.  
52

53  
54 101 A robust reference genome assembly comprised of 243 million base pairs was  
55  
56 102 used to identify and annotate 14,076 protein coding genes, over 3,000 additional  
57  
58 103 transcribed features and a strong complement of repetitive DNA's, tRNA's, and  
59  
60 104 transposable elements. The described protein-coding genes provide strong candidates for  
61  
62

1  
2  
3  
4 105 core metabolism and development, and suggest that these beetles, like their honey bee  
5  
6 106 hosts, rely on olfactory cues and less so on chemosenses related to taste. An analysis of  
7  
8 107 protein groups involved in insecticide metabolism reveals a large repertoire of  
9  
10 108 detoxification enzymes to mediate xenobiotic interactions. The described resources will  
11  
12 109 be useful for both chemical and non-chemical approaches for controlling this key pest of  
13  
14 110 honey bees.  
15  
16  
17  
18

111

## 112 **Results and discussion**

### 113 *Genome traits, genetic diversity and phylogenetic analysis*

114 We generated a genome assembly of 234 Mbp (million base pairs) comprised of 3063  
115 contigs (contig N<sub>50</sub>=298kb; Table 1). The genome sizes of sequenced and assembled  
116 beetle species vary greatly from 160Mbp to 1.1Gbp. The size of the ATUMI genome  
117 assembly is larger than that of the red flour beetle (165.9 Mbp), but much smaller than the  
118 more derived Asian longhorned beetle (707.7 Mbp). A total of 1,293,015 heterozygous  
119 single nucleotide polymorphism (SNP) positions were identified, with an average density  
120 of one SNP per 181 bp. SNP density was significantly different across contigs (T-test,  $P <$   
121 0.01). This pattern was not related to contig size. Overall, 60.2% of SNPs occurred on  
122 contigs with annotated genome features and 22.5% were within gene regions.

123 The NCBI eukaryotic genome annotation pipeline  
124 ([https://www.ncbi.nlm.nih.gov/genome/annotation\\_euk/Aethina\\_tumida/100/](https://www.ncbi.nlm.nih.gov/genome/annotation_euk/Aethina_tumida/100/)) proposed  
125 14,076 protein-coding genes and a total of 17,436 mRNA models. When our previous  
126 RNA sequencing reads were aligned to the genome assembly alongside the predicted  
127 gene models, 99.73% of the predicted mRNA models and 99.65% of the predicted protein-  
128 coding genes were supported. It is possible that the 64 protein-coding genes undetected  
129 by RNA-Seq were not expressed, expressed too briefly, or not captured in our pooled RNA



1  
2  
3  
4 130 samples. Alternatively, these might reflect partial or inaccurate gene models or pseudo-  
5  
6 131 genes that are no longer functional in this beetle.

7  
8  
9 132 By aligning the ATUMI official protein set against 2,444 core Endopterygota  
10  
11 133 Benchmarking Universal Single-Copy Orthologs (BUSCO), 97.5% of complete BUSCOs  
12  
13 134 were found (Figure 2b). We further aligned the ATUMI genome assembly against  
14  
15 135 Endopterygota set of BUSCOs and 92.8% of complete BUSCOs were found  
16  
17 136 (Supplemental File 1). The results suggest a high level of completeness in the genome  
18  
19 137 assembly, as well as the official set of gene models. By comparing single-copy orthologs  
20  
21 138 among the sequenced beetles (ATUMI, TCAST, DPOND, AGLAB, ATAU, APLAN,  
22  
23 139 HHAMP, NVESP), honey bees (AMELL) and *Drosophila melanogaster* (DMELA), 181  
24  
25 140 shared ortholog groups were found. A phylogenetic tree was built by concatenating these  
26  
27 141 shared 181 orthologous groups (Figure 2a). These results suggest that ATUMI is sister to  
28  
29 142 TCAST and the Asian longhorned beetle (AGLAB). OrthoDB [18] orthology delineation  
30  
31 143 revealed that ATUMI has 7,066 conserved orthologous groups with beetles and 4,554  
32  
33 144 orthologous groups shared with ten additional insect species.  
34  
35  
36  
37  
38  
39

145

#### 146 *Loss and duplication of BUSCO genes from the small hive beetle genome*

147 The duplication and absence of core genes, including those represented by BUSCO, could  
148 represent important evolutionary changes in species or in lineages (Figure 3). A complete  
149 protein set of 11 insect species was used for alignment against the ATUMI BUSCO  
150 candidates. We found 337 core Endopterygota BUSCOs that were either fragmented or  
151 completely lost from at least two beetle genomes. We mapped the common ancestor  
152 sequences of these 337 missing orthologs and full set of 2,442 Endopterygota BUSCOs  
153 to the Pfam database. Among the 'lost' orthologs, 1,094 protein domains were found, while  
154 among 2,442 Endopterygota orthologs, 4,632 protein domains were found. By comparing  
155 the count distribution of each domain between lost orthologs and overall orthologs, no

1  
2  
3  
4 156 significant difference was found (Pearson's Chi-square Test,  $P > 0.05$ ). Among the lost  
5  
6 157 orthologs, a methyltransferase (MT), a glycosyltransferase (GT), and two proteins with  
7  
8 158 beta-transducin repeats (WD) and zinc finger (ZF) domains, respectively showed the  
9  
10 159 highest counts and were also absent from at least four beetle species (Figure 2c).

11  
12  
13 160

14  
15 161

16 162 *Glycoside hydrolases*

17  
18 163 Glycoside hydrolases (GHs) are important enzymes that aid in the digestion of plant cell  
19  
20 164 walls and carbohydrates in insects [19]; however, GHs can also contribute to remodeling  
21  
22 165 of the peritrophic matrix (PM) [20], lysosomal enzyme activity, glycoprotein  
23  
24 166 oligosaccharide catabolism, immune response, and growth and development [21, 22]. A  
25  
26 167 limited diversity of GH families was identified in the ATUMI genome when compared to  
27  
28 168 other beetles. While phytophagous insects, such as AGLAB [7], DPOND [13] and HHAMP  
29  
30 169 [14] harbored anywhere from 19-24 different GH families represented by 101-199 genes,  
31  
32 170 only 14 GH families represented by 91 genes were identified in the ATUMI genome. Only  
33  
34 171 OBORB, whose diet is unknown [15], had a lower GH family diversity and GH copy  
35  
36 172 number, with 13 different families represented by 47 different genes. No GH families  
37  
38 173 unique to ATUMI were identified (Supplemental Files 2 and 3).

39  
40  
41  
42  
43  
44 174 Using orthology searches, five orthogroups containing GHs were more prominent  
45  
46 175 in the ATUMI genome compared to other beetles and two GHs lacked orthologs in other  
47  
48 176 beetle genomes. The more prominent orthogroups contained genes with highest scoring  
49  
50 177 BLASTP matches to GH 30 glucosylceramidase (eight copies; sphingolipid metabolism),  
51  
52 178 uncharacterized GH 31  $\alpha$ -glucosidases (five copies), GH 16  $\beta$ -1,3-glucan binding protein  
53  
54 179 (five copies; exoskeleton and/or PM remodeling), GH 38 lysosomal  $\alpha$ -mannosidase (five  
55  
56 180 copies), and GH 18 chitinase (three copies). Interestingly, unigenes coding for GH 18 (20  
57  
58 181 copies), GH 31 (11 copies), and GH 38 enzymes were also among the most prominent

1  
2  
3  
4 182 GH families in the ATUMI genome (Figure 4). Generally, GH 38 copy numbers were high  
5  
6 183 in the ATUMI genome relative to other beetles and were exceeded only by TCAST. In  
7  
8 184 contrast, copy numbers of GH 18 and 31 genes were similar to those found across other  
9  
10 185 beetles. Additionally, two GH genes encoded by the ATUMI genome lacked orthology to  
11  
12 186 other beetle GHs, including a GH 2 family gene coding for  $\beta$ -mannosidase and a GH 35  
13  
14 187 family gene coding for  $\beta$ -galactosidase. Other beetles code for GH 2  $\beta$ -mannosidases and  
15  
16 188 GH 35  $\beta$ -galactosidases, so it is unclear why these two genes were not assigned to  
17  
18 189 orthogroups. However, the evolutionary history of genes coding for GH enzymes is  
19  
20 190 complex and it may be difficult to assign orthologs in some cases.  
21  
22  
23

24 191 Overall, ATUMI lacked a diverse and expansive repertoire of GHs relative to  
25  
26 192 phytophagous beetles, which may reflect the ATUMI diet. Pollen generally contains high  
27  
28 193 concentrations of the monosaccharides glucose and fructose [23], which are used directly  
29  
30 194 for ATP production by the glycolysis pathway (glucose) or after phosphorylation by  
31  
32 195 fructokinase (fructose). Therefore, although pollen can also contain starch, sucrose, and  
33  
34 196 small amounts of pectin [23], digestion of more complex carbohydrates may not be  
35  
36 197 necessary, requiring a less expansive repertoire of GH enzymes relative to phytophagous  
37  
38 198 beetles. Supporting this hypothesis, genes coding for enzymes capable of digesting starch  
39  
40 199 were identified ( $\alpha$ -amylase), but genes coding for invertases and polygalacturonases for  
41  
42 200 sucrose and pectin digestion could not be identified. Alternatively, microbial symbionts  
43  
44 201 harbored by ATUMI may facilitate the breakdown of these polysaccharides as has been  
45  
46 202 observed previously in their honey bee hosts, which share a similar diet [24].  
47  
48  
49  
50

51 203

#### 52 53 204 *Gustatory Receptors*

54  
55 205 G-protein-coupled receptors (GPCRs) comprise a large family of integral membrane  
56  
57 206 proteins found in cells of all eukaryotes [25]. GPCRs function to detect extracellular stimuli,  
58  
59 207 and activate cellular signal transduction pathways that ultimately lead to physiological and  
60  
61  
62

1  
2  
3  
4 208 behavioral responses. Gustatory receptors (GRs) belong to novel arthropod GPCR gene  
5  
6 209 superfamilies, which are phylogenetically unrelated to mammalian taste receptor genes,  
7  
8 210 and distinct from related insect odorant/pheromone receptor genes [26]. GRs are  
9  
10 211 important components of an organism's sensory machinery; the ability of animals to  
11  
12 212 distinguish between nutritious, noxious, and possibly toxic compounds is a matter of life  
13  
14 213 or death. Sensory machinery has been honed over evolutionary time, and has given rise  
15  
16 214 to receptors binding either sweet (attractive) or bitter (aversive) tastants, [27, 28]. An  
17  
18 215 amino-acid substitution in a ligand-binding region may affect the range at which different  
19  
20 216 ligand's receptors may bind, particularly for GRs perceiving sugars [29].  
21  
22  
23

24 217 Gustatory receptor genes fall into four main clades that correspond with  
25  
26 218 perception of different tastants (sweet or bitter; Figure 5). Designations of the type of  
27  
28 219 substance perceived by these receptors can be inferred from other taxa (e.g., *Drosophila*  
29  
30 220 sp.), and the positions of uncharacterized proteins within the cladogram. A group of  
31  
32 221 apparently highly conserved genes encoding proteins for perceiving sweet substances  
33  
34 222 (clades 5a and 64a-f) is separate from other groups that show higher sequence variability;  
35  
36 223 a pattern seen in other studies (e.g., [30]). Proteins of *GR5a* and *GR64a-f* can form  
37  
38 224 heterodimeric complexes at receptor sites, and may or may not be necessary together for  
39  
40 225 perception of different sugars [31, 32]. ATUMI appears to lack a *GR5a* gene (Table 2;  
41  
42 226 Figure 5), suggesting this gene may not be necessary for perceiving sweet tastants. In  
43  
44 227 this group of ATUMI GRs, it is interesting to note that one candidate with a very long  
45  
46 228 branch-length (XP\_019866072) encodes a 379 amino-acid protein derived from 3 exons,  
47  
48 229 and has a very long intron. It is unclear why this gene is so distinct compared to the  
49  
50 230 relatively highly conserved sequences for other related *GR* genes.  
51  
52  
53

54  
55 231 A major finding is that ATUMI has a substantially depauperate repertoire of *GR*  
56  
57 232 genes compared to both AGLAB and TCAST (Figure 5). This low number of *GRs* in  
58  
59 233 ATUMI is more likely the result of a lack of gene expansion in particular lineages or  
60  
61  
62

1  
2  
3  
4  
5  
6  
7  
8  
9  
10  
11  
12  
13  
14  
15  
16  
17  
18  
19  
20  
21  
22  
23  
24  
25  
26  
27  
28  
29  
30  
31  
32  
33  
34  
35  
36  
37  
38  
39  
40  
41  
42  
43  
44  
45  
46  
47  
48  
49  
50  
51  
52  
53  
54  
55  
56  
57  
58  
59  
60  
61  
62  
63  
64  
65

234 subfamilies of *GRs* rather than gene loss. A similarly small number of *GRs* is evident in  
235 the honey bee genome [33]. In that species, the relatively reduced *GR* gene repertoire  
236 may be a consequence of restricted dietary breadth (specialist on pollen and nectar), and  
237 also possibly arises from the processing of collected foods by adult workers and microbes,  
238 which may reduce the load of plant secondary compounds. AMELL larvae are fed  
239 processed foods by attending nurse bees, so they may not need an expansive repertoire  
240 of *GRs* to discriminate among different tastants [30]. Because of the close affinity of  
241 ATUMI with honey bees, including sharing a similar diet, the evolutionary pressures  
242 limiting expansion of *GRs* in ATUMI may be similar. As an example, TCAST, a dietary  
243 generalist, shows a significant expansion in the *GR28a/b* gene complex (Table 2); genes  
244 in this complex may be important for perceiving plant secondary compounds [34].

245           Stemming from their importance to insect biology, *GRs* have been characterized  
246 from genomic and transcriptomic studies for a number of economically important insects,  
247 or those having an ecological and/or epidemiological significance, including TCAST [11],  
248 AGLAB [12] and now ATUMI (this study). Understanding the chemosensory abilities of  
249 insects, particularly pest insects, is important for designing possible means of control that  
250 target the insect's ability to find and/or distinguish among nutrients or to detect poisons,  
251 and/or developing baits containing insecticides formulated with highly attractive  
252 substances.

253

254 *Voltage-gated sodium channel*

255 The voltage-gated sodium channel ( $Na_{v1}$ ) is responsible for generating action potentials in  
256 neurons. Sodium channel modulator insecticides such as pyrethroids and DDT act on the  
257  $Na_{v1}$  channel by maintaining the open state of the channel via interactions with two  
258 proposed binding sites [35, 36]. A diverse collection of mutations in  $Na_{v1}$  has been  
259 identified in many populations of pyrethroid-resistant pests and neurophysiological studies

1  
2  
3  
4  
5  
6  
7  
8  
9  
10  
11  
12  
13  
14  
15  
16  
17  
18  
19  
20  
21  
22  
23  
24  
25  
26  
27  
28  
29  
30  
31  
32  
33  
34  
35  
36  
37  
38  
39  
40  
41  
42  
43  
44  
45  
46  
47  
48  
49  
50  
51  
52  
53  
54  
55  
56  
57  
58  
59  
60  
61  
62  
63  
64  
65

260 of heterologously-expressed channels have confirmed the role of these mutations in  
261 pyrethroid resistance [37].

262 A single transcript and protein were predicted for Na<sub>v1</sub> from the ATUMI assembly  
263 However, Na<sub>v1</sub> is known to possess optional and alternative exons in most insects [38-40].  
264 Alternative exon use diversifies the physiological repertoire of the sodium channel and  
265 may affect insecticide sensitivity [41]. Further cloning experiments to determine the actual  
266 optional and alternative exon use in ATUMI Na<sub>v1</sub> should be informative.

267 A large number of mutations in Na<sub>v1</sub> have been associated with target site  
268 resistance to pyrethroids and DDT [37]. We did not identify such mutations in the predicted  
269 ATUMI Na<sub>v1</sub> nor is this species known to be resistant to these insecticides. Therefore, this  
270 sequence serves as a reference for a susceptible target site for pyrethroids and DDT and  
271 a tool for developing molecular diagnostic assays to monitor changes in resistance allele  
272 frequency.

273

274 *Acetylcholinesterase*

275 Acetylcholinesterase (Ace) cleaves acetylcholine (ACh) to regulate the effect of the  
276 neurotransmitter in the synaptic cleft. Ace is the target of organophosphate (OP) and  
277 carbamate insecticides and mutations in Ace result in target-site insensitivity to these two  
278 insecticide classes [42, 43].

1  
2  
3  
4  
5  
6  
7  
8  
9  
10  
11  
12  
13  
14  
15  
16  
17  
18  
19  
20  
21  
22  
23  
24  
25  
26  
27  
28  
29  
30  
31  
32  
33  
34  
35  
36  
37  
38  
39  
40  
41  
42  
43  
44  
45  
46  
47  
48  
49  
50  
51  
52  
53  
54  
55  
56  
57  
58  
59  
60  
61  
62  
63  
64  
65

279 ATUMI is predicted to possess active forms of both Ace1 (XP\_019871456.1) and  
280 Ace2 (XP\_019866656.1) (Supplemental File 2). Ace mutations involved in OP resistance  
281 [43, 44] are found to be in the susceptible state in the predicted Ace proteins of ATUMI  
282 (Table 3). In the cases where an alternative amino acid was found in ATUMI (i.e,  
283 ATUMI\_Ace2 position 198), that same amino acid was seen in other insects that were  
284 presumably sensitive to OPs, so it does not likely confer reduced OP sensitivity. Ace2  
285 performs primary acetylcholine esterase activity in honey bees, while Ace1 is the primary  
286 enzyme in beetles and most other insects [45]. Therefore identifying compounds that only  
287 inhibit ATUMI\_Ace1 may provide a level of ATUMI-specific control.

1  
2  
3  
4 288 *ATP-Binding Cassette Proteins*

5  
6 289 ATP-binding cassette (ABC) proteins are a large, diverse family of proteins found in most  
7  
8 290 organisms, from bacteria to plants and vertebrates. Most ABC proteins engage in active transport  
9  
10 291 of molecules across cell membranes. This family of transporters is perhaps most notable for  
11  
12 292 moving toxins into or out of cells, which has resulted in the identification of several of these  
13  
14 293 proteins playing a role in the resistance of cancer cells to multiple drug treatments (Multi-Drug  
15  
16 294 Resistant, MDR). So it is not surprising that some of these proteins have been identified as having  
17  
18 295 roles in insect susceptibility or resistance to certain insecticides (Reviewed by [46]). In spite of their  
19  
20 296 importance for shaping pest control methods, these genes are under-studied in insects, with few  
21  
22 297 having been fully characterized in any species. The status of ATUMI as a pest of beehives makes  
23  
24 298 it important to understand what role ABC genes may play in how beekeepers control this species.

25  
26 299 The beetle genetic model organism, TCAST, has had its full suite of ABC-family genes  
27  
28 300 identified through a combination of RNA-seq and genomic analysis. In this species, 74 genes  
29  
30 301 have been identified (Table 4); [47, 48]. The translation products of these genes were used to  
31  
32 302 query the ATUMI genome, in which 56 ABC genes were identified (Table 4). In most respects,  
33  
34 303 the makeup of ABC genes in ATUMI resemble those found in TCAST - both species have identical  
35  
36 304 numbers of ABC-B, D, E, F, and H subfamily members. Indeed, the numbers of members in the  
37  
38 305 D-F and H subfamilies are highly conserved, with DMELA having the same number, and clear  
39  
40 306 one-to-one relationships can be seen in these subfamilies among the members from each species  
41  
42 307 (Figure 6). It should be noted that members of subfamilies E and F do not function as transporters,  
43  
44 308 and are highly conserved in number and sequence between insects and humans. Moreover, RNAi  
45  
46 309 targeting ABC-E and one of the ABC-F genes in TCAST resulted in complete mortality, suggesting  
47  
48 310 that the critical cellular roles of these genes may also be conserved. The ABC-B subfamily also  
49  
50 311 appears well conserved, and may be worth further scrutiny in ATUMI, since this subfamily has  
51  
52 312 been associated with resistance to several classes of pesticides in multiple species [46].

53  
54 313 ATUMI differed from TCAST in member counts for three ABC subfamilies (Table 4). The  
55  
56  
57  
58  
59  
60  
61  
62  
63  
64  
65



1  
2  
3  
4  
5  
6  
7  
8  
9  
10  
11  
12  
13  
14  
15  
16  
17  
18  
19  
20  
21  
22  
23  
24  
25  
26  
27  
28  
29  
30  
31  
32  
33  
34  
35  
36  
37  
38  
39  
40  
41  
42  
43  
44  
45  
46  
47  
48  
49  
50  
51  
52  
53  
54  
55  
56  
57  
58  
59  
60  
61  
62  
63  
64  
65

314 first was subfamily A, for which only four members could be identified in ATUMI, relative to the  
315 ten found in TCAST and DMELA, a number roughly consistent across the insects. However, it is  
316 important to note that ABC-A genes are fairly large full transporters, and as such are often  
317 complex and difficult to identify in full. So, it is likely that some of the ABC-A genes are either not  
318 present in the current genome assembly, or are too fractured to recognize. It is also interesting to  
319 note that the beetle ABC-A genes appear to segregate from those of DMELA (Figure 6),  
320 suggesting possible pesticide targets against ATUMI, which may not harm other species,  
321 including pollinators.

322 TCAST appears to have one more ABC-G gene than does ATUMI; specifically, ATUMI  
323 appears to lack an ortholog of the well-studied DMELA eye-pigment transporter known as Brown  
324 (Bw). However, it has been well documented that Bw orthologs has substantially diverged in  
325 TCAST [48]. It is possible that similar divergence has also prevented clear identification of a Bw  
326 ortholog in ATUMI. Otherwise, most other ABC-G genes have clear one-to-one orthologs in all  
327 three species (Figure 6).

328 The largest subfamily, the ABC-C genes, is known to play roles in multi-drug resistance  
329 in human disease, and some have been associated with Bt resistance in lepidopterans [46].  
330 ATUMI has fewer ABC-Cs than TCAST, but more than DMELA. At first, this might suggest a  
331 beetle-specific expansion as well as a TCAST-specific expansion. Indeed, there is a suite of  
332 expansions that may be beetle-specific (Figure 6), although comparisons to more species would  
333 be required to confirm this. However, each species also appears to have its own expansions;  
334 TCAST and ATUMI expansions are often tandem, as can be seen by the number of genes found  
335 on the same linkage groups/scaffolds (Figure 6). Indeed, there are surprisingly few clear one-to-  
336 one orthologous relationships, suggesting rapid evolution of ABC-C genes to fill species-specific  
337 needs. To understand ATUMI responses to pesticides, these ATUMI-specific expansions may be  
338 worth further study.

1  
2  
3  
4  
5  
6  
7  
8  
9  
10  
11  
12  
13  
14  
15  
16  
17  
18  
19  
20  
21  
22  
23  
24  
25  
26  
27  
28  
29  
30  
31  
32  
33  
34  
35  
36  
37  
38  
39  
40  
41  
42  
43  
44  
45  
46  
47  
48  
49  
50  
51  
52  
53  
54  
55  
56  
57  
58  
59  
60  
61  
62  
63  
64  
65

#### 340 *Gluthatione-S-Transferase*

341 Gluthatione-S-Transferases (GSTs) are conjugases that bind glutathione to a wide variety of  
342 substrates such as plant allelochemicals, insecticides, reactive oxygen species, and metabolic  
343 products that can provide detoxification, antioxidant, excretion, and transport functions [49], [50],  
344 [51]. Insect GSTs are widely studied due to their role in insecticide resistance [52]. Genomic  
345 analyses show that insects possess between 10 to 41 genes that encode GSTs distributed across  
346 8 classes (i.e. Delta, Epsilon, Omega, Sigma, Theta, Zeta, Microsomal, and Unclassified) [53].

347 In the ATUMI genome, 49 GSTs were identified, 9 of which displayed isoforms (Figure 7;  
348 Table 5). The number of genes in the ATUMI genome is very similar to what has been identified  
349 in TCAST, especially in the Delta, Epsilon, Sigma, and Theta classes. Relative to other insects,  
350 ATUMI and TCAST have expansions in the Epsilon, Sigma, Zeta, and Microsomal GST classes,  
351 which supports the hypothesis that these may be Coleoptera-specific class expansions [53]. The  
352 small number of genes in the Delta class for both ATUMI and TCAST suggests a class contraction  
353 or lack of expansion within the beetles.

354 Increases in the expression and activity Delta and Epsilon classes confer resistance to  
355 diverse classes of insecticides such organophosphates, organochlorines (DDT), and pyrethroids  
356 [50], [52]. These two GST classes tend to be the most numerous and dynamic in terms of  
357 expansions and contractions [53]. Therefore it would appear that ATUMI possesses a wide  
358 diversity of GSTs, especially in the Epsilon class, to detoxify insecticides utilized for their control.

359

#### 360 *Cytochrome P450*

361 The Cytochrome P450 monooxygenases (CYP450s) are classified as phase I metabolic  
362 enzymes which are involved in the biosynthesis, bioactivation, and regulation of endogenous  
363 compounds such as hormones, fatty acids, and sterols as well as detoxification of xenobiotic  
364 compounds such as plant allelochemicals and insecticides. Overexpression of CYP450s often  
365 underlies high levels of detoxification-mediated insecticide resistance in many insects [54] [55]

1  
2  
3  
4  
5  
6  
7  
8  
9  
10  
11  
12  
13  
14  
15  
16  
17  
18  
19  
20  
21  
22  
23  
24  
25  
26  
27  
28  
29  
30  
31  
32  
33  
34  
35  
36  
37  
38  
39  
40  
41  
42  
43  
44  
45  
46  
47  
48  
49  
50  
51  
52  
53  
54  
55  
56  
57  
58  
59  
60  
61  
62  
63  
64  
65

366 [56]. In the 69 insect genomes that have been published, more than 7,500 P450 genes have been  
367 identified in 208 families across 4 clans (CYP2, CYP3, CYP4 and Mitochondrial) [57].

368 In ATUMI, we found 116 genes across the 4 CYP clans (Figure 8, Table 6). The CYP2  
369 and mitochondrial clans contained 8 and 10 genes, respectively, and orthologs were identified in  
370 other species. The conservation in sequence and number is expected as many of the genes in  
371 these clans are involved in ecdysteroid biosynthesis [58]. In contrast to the conserved CYP2 and  
372 mitochondrial clans, there are clear expansions in CYP3 and CYP4 compared to other species.  
373 These expansions are typified by large expansions of a single family that lacks orthologs in other  
374 species [59]. Within the CYP3 clan, the 55 genes are clustered in smaller blooms with the largest  
375 consisting of 13 genes. The 43 genes belonging to the CYP4 clan of ATUMI is among the largest  
376 seen in insects [7] with a noticeably large bloom of 20 genes. Additionally, CYPs in the CYP3 and  
377 CYP4 clans have been implicated in insecticide resistance [60] [61] [62]. Therefore, a rapid onset  
378 of insecticide resistance may be facilitated by the large number of CYPs in the CYP3 and CYP4  
379 clans in the ATUMI genome.

### 380 381 *Carboxyl/Choline Esterases*

382 Carboxyl/Choline Esterases (COEs) are capable of metabolizing a wide variety of substrates and  
383 their activity is involved in a number of physiological processes such as bioactivation of juvenile  
384 hormone and regulating acetylcholine interactions at the synapse [63] [64]. Increases in the  
385 amount of esterase expression and mutations in the catalytic site of esterases confer insecticide  
386 resistance [65] [66]. Insects possess a wide variety of COEs that are broadly classified as  
387 intracellular or dietary (Clades A-C), secreted pheromone/hormone processing (Clades D-G), and  
388 neurodevelopmental (Clades H-M) [63].

389 The ATUMI genome contained 60 genes encoding putative COEs, with only one  
390 displaying multiple isoforms (Figure 9). The number of genes in the secreted and  
391 neurodevelopmental groups was mostly consistent with other insects (Table 7). The expansion of

1  
2  
3  
4  
5  
6  
7  
8  
9  
10  
11  
12  
13  
14  
15  
16  
17  
18  
19  
20  
21  
22  
23  
24  
25  
26  
27  
28  
29  
30  
31  
32  
33  
34  
35  
36  
37  
38  
39  
40  
41  
42  
43  
44  
45  
46  
47  
48  
49  
50  
51  
52  
53  
54  
55  
56  
57  
58  
59  
60  
61  
62  
63  
64  
65

392 Clade E (Secreted  $\beta$ -esterase) is consistent with a similar expansion in TCAST. This expansion  
393 is not entirely characteristic of Coleoptera as DPOND and AGLAB only have 4 and 1 member of  
394 Clade E, respectively [7]. The 10 genes for neurologins is nearly twice the number seen in other  
395 insects [12] [67] [68]. Nevertheless, the general conservation in sequence and number suggests  
396 critical roles for these COEs across insects. In contrast to COEs in the secreted and  
397 neurodevelopmental groups, a vast majority of ATUMI COEs in the intracellular or dietary class  
398 lacked clear orthologs in TCAST, AMELL, or DMELA. This expansion of intracellular or dietary  
399 esterases is consistent with expansions observed in other insect genomes. These species-  
400 specific expansions of intracellular or dietary esterases may be due to dietary differences among  
401 these insects. Dietary esterases may also contribute to insecticide resistance [63]. Therefore,  
402 this expansive array of dietary esterases may allow ATUMI to detoxify insecticides that may be  
403 used for control.

404 ATUMI is an expanding invasive pest of honey bees, disrupting managed bee colonies  
405 and arguably having a strong impact on feral on naturally occurring colonies. We anticipate the  
406 resources described here will lead to novel methods to track and control this pest. The ATUMI  
407 genome also reveals numerous evolutionary distinctions relative to other sequenced arthropods.  
408 These distinctions help clarify the sensory cues used by ATUMI and the dietary habits of this  
409 beetle, and of beetles (order Coleoptera) more broadly.

410  
411 **Methods**

412 *DNA extraction*

413 ATUMI adults were collected from a population maintained by the USDA-ARS Honey Bee  
414 Breeding, Genetics and Physiology Laboratory (Baton Rouge, LA) in November 2011. ATUMI  
415 larvae were collected March 8, 2014, from a continuous culture of small hive beetles maintained  
416 at the USDA-ARS Bee Research Laboratory. For adult beetles, extractions were carried out on  
417 three whole male beetles using the Qiagen DNEasy kit. Larval DNA was extracted from 150

1  
2  
3  
4 418 second-instar larvae in 30 groups of five larvae each. Larvae were crushed using a plastic pestle  
5  
6 419 in 1ml of freshly prepared CTAB buffer consisting of 100 mM TrisHCl (pH 8.0), 20 mM EDTA (pH.  
7  
8 420 8.0), 1.4 M NaCl, 2% CTAB and 0.2%  $\beta$ -mercaptoethanol. The suspension was incubated at 65°C  
9  
10 421 for 60 minutes, with gentle mixing at 0, 20, and 40 minutes. Samples were centrifuged for 2 min  
11  
12 422 at 14k rpm (20817 g) in an Eppendorf microcentrifuge. 500  $\mu$ l of the supernatant was moved into  
13  
14 423 a new tube containing using a wide-bore pipette into a sterile tube containing 500  $\mu$ l  
15  
16 424 chloroform:isoamylalcohol (24:1). After gentle mixing by hand, tubes were centrifuged at 14k rpm  
17  
18 425 for 15 min. Approximately 400  $\mu$ l of the aqueous layer was transferred into new tubes containing  
19  
20 426 250  $\mu$ l cold isopropanol, followed by gentle mixing and incubation at 4°C for 30 minutes. Samples  
21  
22 427 were centrifuged at 14k rpm for 30 min a 4°C, and then the supernatant was poured off. Pellets  
23  
24 428 were washed with 1 ml cold 75% EtOH and centrifuged again for 2 min at 14k rpm. After the  
25  
26 429 supernatant was poured off, the resulting pellets were washed in 1 ml cold 100% EtOH,  
27  
28 430 centrifuged for 2 min, after which the EtOH was poured off, the pellets were spun for an additional  
29  
30 431 30 seconds, and the last of the wash was removed by pipette. Pellets were air-dried for 30 minutes  
31  
32 432 and the resulting DNA pellet was resuspended in 50  $\mu$ l ddH<sub>2</sub>O. Samples were incubated for 30  
33  
34 433 min with 2.5  $\mu$ l of an RNase cocktail at 37°C, followed by gentle addition of 5  $\mu$ l of 7M NaOAc and  
35  
36 434 100  $\mu$ l EtOH. After 30 minutes of incubation on wet ice, the DNA samples were spun at 12k rpm  
37  
38 435 for 30 min, washed once with 70% EtOH, dried and suspended in 20  $\mu$ l ddH<sub>2</sub>O. Extracts were  
39  
40 436 pooled and assayed by gel electrophoresis to ensure DNA integrity and by Nanodrop  
41  
42 437 (Thermofisher, Inc.) for quantification (180 ng/ $\mu$ l in 25  $\mu$ l, 45  $\mu$ g total DNA).  
43  
44  
45  
46  
47  
48  
49  
50

51 438  
52  
53 439 DNA sequencing  
54

55 440 In total, 1,173,425,522 Illumina DNA reads (101 base-pairs [bp] per read with a 300 bp insert size,  
56  
57 441 Hi-Seq 2500) were generated from 12 paired-end (PE) libraries generated from DNA from the  
58  
59 442 three adult male beetles. An additional 1,235,055 Pacific BioSciences (PacBio) reads (average  
60  
61 443 read length = 6795 bp) were generated from 40 SMRT cells (Chemistry C2, PacBio, Menlo Park,  
62  
63  
64  
65

1  
2  
3  
4 444 CA), using DNA derived from the pooled larval beetles. A two-step method was used to assemble  
5  
6 445 the genome. First, the Sparse assembler was used to build short but accurate contigs from the  
7  
8  
9 446 Illumina reads using the settings: (LD 0 K 41 g 15 NodeCovTh 1 EdgeCovTh 0 GS 600000000)  
10  
11 447 [69]. The assembled contigs were used as a backbone for further assembly. Second, the PacBio  
12  
13 448 reads were error corrected by the proofread package (default settings) [70] and the error-  
14  
15 449 corrected PacBio reads were used to construct long contigs by filling the gaps of the backbones  
16  
17  
18 450 using the Sparc package deployed with default settings [71]. Genes were annotated using version  
19  
20 451 7.2 of the NCBI eukaryotic annotation pipeline [72]. Illumina mRNA paired-end sequencing reads  
21  
22 452 (101 bp per read, >1000x transcriptome coverage) reflecting an equimolar pool of all ATUMI life  
23  
24 453 stages (described in [73] and downloaded from USDA AgDataCommons;  
25  
26 454 <https://tinyurl.com/ybanauxb>) were used to assist gene annotation. Full annotation details for this  
27  
28  
29 455 gene set are described at  
30  
31 456 [https://www.ncbi.nlm.nih.gov/genome/annotation\\_euk/Aethina\\_tumida/100/](https://www.ncbi.nlm.nih.gov/genome/annotation_euk/Aethina_tumida/100/). Transcriptome  
32  
33 457 sequencing reads were aligned to the constructed ATUMI genome assembly to evaluate the  
34  
35 458 completeness of the gene set, using the TopHat2 package [45]. Reads were also mapped using  
36  
37  
38 459 HISAT2 (<https://ccb.jhu.edu/software/hisat2/index.shtml>), showing a marginal increase in aligned  
39  
40 460 reads. We further assessed the completeness of the genome assembly using BUSCO  
41  
42 461 (Benchmarking Universal Single Copy Orthologs; [74]).  
43  
44 462

46 463 *Phylogenetic and genetic diversity of beetles*

48  
49 464 The official protein sets of ATUMI, the red flour beetle (*Tribolium castaneum*) [11], mountain pine  
50  
51 465 beetle (*Dendroctonus ponderosae*) [13], Asian longhorned beetle (*Anoplophora glabripennis*)  
52  
53 466 [12], dung beetle (*Onthophagus taurus*;  
54  
55 467 [https://www.ncbi.nlm.nih.gov/assembly/GCA\\_000648695.1/](https://www.ncbi.nlm.nih.gov/assembly/GCA_000648695.1/)), emerald ash borer (*Agrilus*  
56  
57  
58 468 *planipennis*; [https://www.ncbi.nlm.nih.gov/assembly/GCF\\_000699045.1/](https://www.ncbi.nlm.nih.gov/assembly/GCF_000699045.1/)), coffee borer beetle  
59  
60 469 (*Hypothenemus hampei*) [14], burying beetle (*Nicrophorus vespilloides*) [16], scarab beetle

1  
2  
3  
4 470 (*Oryctes borbonicus*) [15], honey bee (*Apis mellifera*) [75], and fruit fly (*Drosophila melanogaster*)  
5  
6 471 [76] were used to query the BUSCO Endopterygota ortholog set. Single copy orthologs shared  
7  
8 472 by all 11 insect species were further used for phylogenetic analysis. Protein sequences of these  
9  
10 473 orthologous groups (OGs) were aligned using MUSCLE using default protein settings [77].  
11  
12 474 Alignments were quality trimmed with trimAl (-w 3 -gt 0.95 -st 0.01) [78] and the orthologous  
13  
14 475 groups were concatenated for use in phylogenetic analysis. A maximum likelihood (ML) tree  
15  
16 476 search was implemented using the program RAxML version 8.2.9 [79] with 1000 bootstrap  
17  
18 477 replicates (-N 1000 -m PROTGAMMAAUTO -f a). The final tree was viewed and edited with  
19  
20 478 TreeGraph2 [80]. Microsatellite markers were identified in the ATUMI genome assembly using  
21  
22 479 the Microsatellite Search and Building Database (MSDB) package and default settings [81]. The  
23  
24 480 raw Illumina gDNA reads, used to assemble the ATUMI genome, were re-aligned to the assembly  
25  
26 481 using BWA with default settings [82]. The aligned reads were used to identify single nucleotide  
27  
28 482 polymorphism (SNP) positions using GATK under default settings (version 3.6; [83]), and the  
29  
30 483 further annotated with SNPEFF [84].  
31  
32  
33  
34  
35  
36  
37

### 38 484 39 *Gustatory Receptors*

40 486 The repertoire of gustatory receptors has been preliminarily characterized for TCAST [85] (62  
41  
42 487 GRs) and *A. glabripennis* [86]. Additionally, online databases have listed gustatory receptors for  
43  
44 488 *T. castaneum*, including UniProtKB ([www.uniprot.org](http://www.uniprot.org) [87]), and BeetleBase ([www.Beetlebase.org](http://www.Beetlebase.org)  
45  
46 489 [88]). Amino acid sequences for putative and identified *GR* genes were compiled from these  
47  
48 490 resources and truncated to remove redundancies. The compiled TCAST gene set contained 71  
49  
50 491 *GR* genes. To identify and enumerate gustatory receptors for AGLAB and ATUMI, amino acid  
51  
52 492 sequences of TCAST gustatory receptor genes were submitted to the ATUMI RefSeq gene set  
53  
54 493 and genome assembly using BLASTP and TBLASTN, respectively. Putative *GR* genes for both  
55  
56 494 species were selected from hits based on an E-score  $\leq$  to  $E^{-100}$ . Using the data set of *GR* genes  
57  
58 495 compiled for *T. castaneum*, 38 and 11 putative GR proteins were identified for AGLAB and ATUMI,  
59  
60  
61  
62  
63  
64  
65

1  
2  
3  
4 496 respectively. Sequences were aligned using MUSCLE [77]. The PhyML program (v3.1/3.0 aLRT)  
5  
6 497 was used to build a phylogenetic tree using maximum likelihood method [25, 89]. The tree was  
7  
8 498 further edited and visualized with the TreeDyn (v198.3) program [90]. All analyses from the  
9  
10  
11 499 sequence alignment to tree reconstruction were performed on the phylogeny.fr platform [91].  
12  
13 500 Sequences obtained in Newick format from this platform were used as input in the iTOL  
14  
15 501 program to construct and visualize using an unrooted, circular phylogenetic tree [92].  
16

17 502  
18  
19  
20 503 *ABC Transporters*  
21  
22 504 Potential ATUMI ABC genes homologous to TCAST ABCs were identified using protein BLAST  
23  
24 505 to search with each TCAST ABC sequence using WebApollo at [https://i5k.nal.usda.gov/aethina-](https://i5k.nal.usda.gov/aethina-tumida)  
25  
26 506 *tumida*. Protein sequences from ATUMI, TCAST, and DMELA were then compiled, and trimmed  
27  
28 507 to exclude all but 51 residues around the Walker B motif of the nucleotide binding domain. This  
29  
30  
31 508 51-amino-acid sequence was then used to build the phylogenetic tree (See Table 3 for the  
32  
33 509 sequences used from ATUMI). The maximum likelihood phylogenetic tree was constructed using  
34  
35 510 the program MEGA, version 7 [93], using default parameters in all categories except: LG model  
36  
37 511 of amino-acid substitution with Gamma distributed substitution rates (based on Best Model  
38  
39 512 determination within the MEGA program), and Partial Deletion treatment of gaps/missing data  
40  
41  
42 513 [94].  
43

44 514  
45  
46 515 *Insecticide targets and detoxification genes*  
47  
48  
49 516 The predicted proteins from the official gene set of ATUMI (taxid 116153) were queried with  
50  
51 517 TCAST orthologs for gene families and pathway members related to insecticide resistance via  
52  
53 518 BLASTP. Putative orthologs in ATUM were designated by >95% query coverage and E-value  
54  
55 519 <1E<sup>-100</sup>.  
56

57 520  
58  
59  
60 521 **Availability of supporting data**  
61



1  
2  
3  
4  
5  
6  
7  
8  
9  
10  
11  
12  
13  
14  
15  
16  
17  
18  
19  
20  
21  
22  
23  
24  
25  
26  
27  
28  
29  
30  
31  
32  
33  
34  
35  
36  
37  
38  
39  
40  
41  
42  
43  
44  
45  
46  
47  
48  
49  
50  
51  
52  
53  
54  
55  
56  
57  
58  
59  
60  
61  
62  
63  
64  
65

522 Data supporting the results of this article are deposited at NCBI-Bioproject PRJNA256171.

523 Further supporting data can also be found in the *GigaScience* respository, GigaDB [95].

524

**Abbreviations**

526 ATUMI: small hive beetle; BUSCO: Benchmarking Universal Single Copy Orthologs

527

**Competing Interest**

529 The authors declare that they have no competing interests.

530

**Funding**

532 QH was supported by competitive award no. 2017-06481 from the USDA National Institute of

533 Food and Agriculture to JDE.

534

**Author contributions**

536 J.D.E. and Q.H. designed the study. Q.H. assembled the genome and led the bioinformatics

537 analyses. All authors contributed to annotation and/or context, as well as writing the manuscript.

538

**Acknowledgements**

540 We appreciate bioinformatics support from the Competency Centre in Bioinformatics and

541 Computational Biology, Bern, Switzerland.

542

543

544

1  
2  
3  
4  
5  
6  
7  
8  
9  
10  
11  
12  
13  
14  
15  
16  
17  
18  
19  
20  
21  
22  
23  
24  
25  
26  
27  
28  
29  
30  
31  
32  
33  
34  
35  
36  
37  
38  
39  
40  
41  
42  
43  
44  
45  
46  
47  
48  
49  
50  
51  
52  
53  
54  
55  
56  
57  
58  
59  
60  
61  
62  
63  
64  
65

545 **Additional files**

546 File S1 MS-Word. Detailed material and methods.

547 File S2 MS-Excel. Orthology assignments for glycoside hydrolases (GHs) coded by ATUMI.

548 File S3 MS-Excel. Protein identifiers for orthogroup assignments.

549

550 **References**

551

- 552 1. Lundie AE. The small hive beetle *Aethina tumida*, Science Bulletin 220. In: Forestry  
553 DoAa, (ed.). Pretoria, South Africa 1940.
- 554 2. Neumann P, Pettis JS and Schäfer MO. Quo vadis *Aethina tumida*? Biology and control  
555 of small hive beetles. Apidologie. 2016;47 3:427-66. doi:10.1007/s13592-016-0426-x.
- 556 3. Al Toufalia H, Alves DA, Bená DDC, Bento JMS, Iwanicki NSA, Cline AR, et al. First  
557 record of small hive beetle, *Aethina tumida* Murray, in South America. Journal of  
558 Apicultural Research. 2017;56 1:76-80. doi:10.1080/00218839.2017.1284476.
- 559 4. Lee S, Hong KJ, Cho YS, Choi YS, Yoo MS and Lee S. Review of the subgenus *Aethina*  
560 Erichson s. str. (Coleoptera: Nitidulidae: Nitidulinae) in Korea, reporting recent invasion  
561 of small hive beetle, *Aethina tumida*. Journal of Asia-Pacific Entomology. 2017;20 2:553-  
562 8. doi:10.1016/j.aspen.2017.03.006.
- 563 5. Buchholz S, Schäfer MO, Spiewok S, Pettis JS, Duncan M, Ritter W, et al. Alternative  
564 food sources of *Aethina tumida* (Coleoptera: Nitidulidae). Journal of Apicultural  
565 Research. 2008;47 3:202-9. doi:10.3827/IBRA.1.47.3.08.
- 566 6. Neumann P, Pirk CWW, Hepburn HR, Solbrig AJ, Ratnieks FLW, Elzen PJ, et al. Social  
567 encapsulation of beetle parasites by Cape honeybee colonies (*Apis mellifera capensis*  
568 Esch.). Naturwissenschaften. 2001;88 5:214-6. doi:10.1007/s001140100224.

1  
2  
3  
4  
5  
6  
7  
8  
9  
10  
11  
12  
13  
14  
15  
16  
17  
18  
19  
20  
21  
22  
23  
24  
25  
26  
27  
28  
29  
30  
31  
32  
33  
34  
35  
36  
37  
38  
39  
40  
41  
42  
43  
44  
45  
46  
47  
48  
49  
50  
51  
52  
53  
54  
55  
56  
57  
58  
59  
60  
61  
62  
63  
64  
65

569 7. Haddad S and McKenna DD. Phylogeny and evolution of the superfamily  
570 Chrysomeloidea (Coleoptera: Cucujiformia). Systematic Entomology. 2016;41 4:697-  
571 716.

572 8. McKenna DD, A.L. Wild, K. Kanda, C.L. Bellamy, R.G. Beutel, M.S. Caterino, C.W.  
573 Farnum, D.C. Hawks, M.A. Ivie, M.L. Jameson, R.A.B. Leschen, A.E. Marvaldi, J.V.  
574 McHugh, A.F. Newton, J.A. Robertson, M.K. Thayer, M.F. Whiting, J.F. Lawrence, A.  
575 Ślipiński, D.R. Maddison, B.D. Farrell. The beetle tree of life reveals Coleoptera survived  
576 end Permian mass extinction to diversify during the Cretaceous terrestrial revolution.  
577 Systematic Entomology. 2015:1-46. doi:10.1111/syen.12132.

578 9. Robertson JA, A. Ślipiński, M. Moulton, F.W. Shockley, A. Giorgi, N.P. Lord, D.D.  
579 McKenna, W. Tomaszewska, J. Forrester, K.B. Miller, M.F. Whiting, J.V. McHugh.  
580 Phylogeny and classification of the beetle superfamily Cucujoidea and the recognition of  
581 a new superfamily Coccinelloidea (Coleoptera: Cucujiformia). 2015;Systematic  
582 Entomology doi:10.1111/syen.12138.

583 10. McKenna DD. Beetle genomes in the 21st century: prospects, progress and priorities. .  
584 Current Opinion in Insect Science 2018;25 76-82.

585 11. Richards S, Gibbs RA, Weinstock GM, Brown SJ, Denell R, Beeman RW, et al. The  
586 genome of the model beetle and pest *Tribolium castaneum*. Nature. 2008;452 7190:949-  
587 55. doi:10.1038/nature06784.

588 12. McKenna DD, Scully ED, Pauchet Y, Hoover K, Kirsch R, Geib SM, et al. Genome of the  
589 Asian longhorned beetle (*Anoplophora glabripennis*), a globally significant invasive  
590 species, reveals key functional and evolutionary innovations at the beetle-plant interface.  
591 Genome Biology. 2016;17 227 doi:10.1186/s13059-016-1088-8.

592 13. Keeling CI, Yuen MMS, Liao NY, Roderick Docking T, Chan SK, Taylor GA, et al. Draft genome  
593 of the mountain pine beetle, *Dendroctonus ponderosae* Hopkins, a major forest pest. Genome  
594 Biology. 2013;14 3:R27. doi:10.1186/gb-2013-14-3-r27.

1  
2  
3  
4  
5  
6  
7  
8  
9  
10  
11  
12  
13  
14  
15  
16  
17  
18  
19  
20  
21  
22  
23  
24  
25  
26  
27  
28  
29  
30  
31  
32  
33  
34  
35  
36  
37  
38  
39  
40  
41  
42  
43  
44  
45  
46  
47  
48  
49  
50  
51  
52  
53  
54  
55  
56  
57  
58  
59  
60  
61  
62  
63  
64  
65

595 14. Vega, F & Brown, S & Chen, H & Shen, E & Nair, M & Ceja-Navarro, J & Brodie, E &  
596 Infante, FF Dowd, PF, Pain, A. Draft genome of the most devastating insect pest of  
597 coffee worldwide: the coffee berry borer, *Hypothenemus hampei*. Scientific Reports.  
598 2015;5:12525.

599 15. Meyer JM, Markov GV, Baskaran P, Herrmann M, Sommer RJ and Rödelsperger C.  
600 Draft Genome of the Scarab Beetle *Oryctes borbonicus* on La Réunion Island. Genome  
601 Biology and Evolution. 2016;8 7:2093-15.

602 16. Cunningham CB, Ji L, Axel R, Wiberg W, Shelton J, McKinney EC, et al. The Genome  
603 and Methylome of a Beetle with Complex Social Behavior, *Nicrophorus vespilloides*  
604 (Coleoptera: Silphidae) Genome Biol Evol. 2015;7 12:3383-96. doi:10.1093/gbe/evv194.

605 17. Schoville SD, Chen YH, Andersson MN, Benoit JB, Bhandari A, Bowsher JH, et al. A model  
606 species for agricultural pest genomics: the genome of the Colorado potato beetle, *Leptinotarsa*  
607 *decemlineata* (Coleoptera: Chrysomelidae). Scientific Reports. 2018;8 1:1931.  
608 doi:10.1038/s41598-018-20154-1.

609 18. Emms DM and Kelly S. OrthoFinder: solving fundamental biases in whole genome  
610 comparisons dramatically improves orthogroup inference accuracy. Genome Biology.  
611 2015;16:157.

612 19. Pauchet Y, Wilkinson P and Chauhan R. Diversity of the beetle genes encoding novel  
613 plant cell wall degrading enzymes. PloS One. 2010;5:e15635.

614 20. Merzendorfer H and Zimoch L. Chitin metabolism in insects: structure, function and  
615 regulation of chitin synthases and chitinases. Journal of Experimental Biology.  
616 2003;206:4393-412.

617 21. Kramer KJ and Muthukrishnan S. Insect chitinases: Molecular biology and potential use  
618 as biopesticides. Insect Biochemistry and Molecular Biology. 1997;27:887-900.

1  
2  
3  
4  
5  
6  
7  
8  
9  
10  
11  
12  
13  
14  
15  
16  
17  
18  
19  
20  
21  
22  
23  
24  
25  
26  
27  
28  
29  
30  
31  
32  
33  
34  
35  
36  
37  
38  
39  
40  
41  
42  
43  
44  
45  
46  
47  
48  
49  
50  
51  
52  
53  
54  
55  
56  
57  
58  
59  
60  
61  
62  
63  
64  
65

619 22. Fujita Kea. A chitinase structurally related to the glycoside hydrolase family 48 is  
620 indispensable for hormonally induced diapause termination in a beetle. *Biochemical and*  
621 *Biophysical Research Communications*. 2006;345:502-7.

622 23. Pacini E. Types and meaning of pollen carbohydrate reserves. *Sexual Plant*  
623 *Reproduction*. 1996;362.

624 24. Engel P, Martinson VG and Moran NA. Functional diversity within the simple gut  
625 microbiota of the honey bee. *Proceedings of the National Academy of Sciences of the*  
626 *United States of America*. 2012;109 27:11002-7.

627 25. Guindon S and Gascuel O. A simple, fast, and accurate algorithm to estimate large  
628 phylogenies by maximum likelihood. *Syst Biol*. 2003;52 5:696-704.

629 26. Clyne PJ, Warr CG and Carlson JR. Candidate taste receptors in *Drosophila*. *Science*.  
630 2000;287 5459:1830.

631 27. Thorne N, Chromey C Fau - Bray S, Bray S Fau - Amrein H and Amrein H. Taste  
632 perception and coding in *Drosophila*. *Current Biology*. 2004;14 12:1065-79.

633 28. Wang Z, Singhvi A Fau - Kong P, Kong P Fau - Scott K and Scott K. Taste  
634 representations in the *Drosophila* brain. *Cell*. 2004;117 7:981-91.

635 29. Isono K and Morita H. Molecular and cellular designs of insect taste receptor system.  
636 *Frontiers in Cellular Neuroscience*. 2010;4:20.

637 30. Robertson H and Wanner K. The chemoreceptor superfamily in the honey bee, *Apis*  
638 *mellifera*: expansion of the odorant, but no gustatory receptor family. *Genome Research*.  
639 2006;16:1395-403.

640 31. Amrein H. An expression system for Gustatory receptors—and why it failed. *Fly*. 2014;8  
641 4:232-3. doi:10.1080/19336934.2015.1039756.

642 32. Freeman EG, Wisotsky Z and Dahanukar A. Detection of sweet tastants by a conserved  
643 group of insect gustatory receptors. *Proceedings of the National Academy of Sciences*.  
644 2014;111 4:1598-603. doi:10.1073/pnas.1311724111.

1  
2  
3  
4  
5  
6  
7  
8  
9  
10  
11  
12  
13  
14  
15  
16  
17  
18  
19  
20  
21  
22  
23  
24  
25  
26  
27  
28  
29  
30  
31  
32  
33  
34  
35  
36  
37  
38  
39  
40  
41  
42  
43  
44  
45  
46  
47  
48  
49  
50  
51  
52  
53  
54  
55  
56  
57  
58  
59  
60  
61  
62  
63  
64  
65

645 33. Honey Bee Genome Sequencing Consortium. Insights into social insects from the  
646 genome of the honeybee *Apis mellifera*. Nature 2006;443:931-49.  
647 doi:10.1038/nature05260.

648 34. Wanner KW and Robertson HM. The gustatory receptor family in the silkworm moth  
649 *Bombyx mori* is characterized by a large expansion of a single lineage of putative bitter  
650 receptors. Insect Molecular Biology. 2008;17 6:621-9. doi:10.1111/j.1365-  
651 2583.2008.00836.x.

652 35. Du Y, Nomura Y, Satar G, Hu Z, Nauen R, He SY, et al. Molecular evidence for dual  
653 pyrethroid-receptor sites on a mosquito sodium channel. PNAS. 2013;110 29:11785-90.  
654 doi:10.1073/pnas.1305118110.

655 36. O'Reilly AO, Khambay BPS, Williamson MS, Field LA, Wallace BA and Davies TGE.  
656 Modelling insecticide-binding sites in the voltage-gated sodium channel. Biochem J.  
657 2006;396:255-63.

658 37. Rinkevich FD, Du Y and Dong K. Diversity and convergence of sodium channel  
659 mutations involved in resistance to pyrethroids Pestic Biochem Physiol. 2013;106:93-  
660 100.

661 38. Lee SH, Ingles PJ, Knipple DC and Soderlund DM. Developmental regulation of  
662 alternative exon usage in the house fly *Vssc1* sodium channel gene. Invert Neurosci.  
663 2002;4:125-33.

664 39. Shao YM, Dong K, Tang ZH and Zhang CX. Molecular characterization of a sodium  
665 channel gene from the silkworm *Bombyx mori*. Insect Biochem Molec Biol. 2009;39:145-  
666 51.

667 40. Davies T, Field L, Usherwood P and Williamson M. A comparative study of voltage-  
668 gated sodium channels in the Insecta: implications of pyrethroid resistance in  
669 Anopheline and other Neopteran species. Insect Molecular Biology. 2007;16 3:361-75.

1  
2  
3  
4  
5  
6  
7  
8  
9  
10  
11  
12  
13  
14  
15  
16  
17  
18  
19  
20  
21  
22  
23  
24  
25  
26  
27  
28  
29  
30  
31  
32  
33  
34  
35  
36  
37  
38  
39  
40  
41  
42  
43  
44  
45  
46  
47  
48  
49  
50  
51  
52  
53  
54  
55  
56  
57  
58  
59  
60  
61  
62  
63  
64  
65

670 41. Tan J. Alternative splicing of an insect sodium channel gene generates  
671 pharmacologically distinct sodium channels. *J Neurosci.* 2002;22:5300.

672 42. Fournier D and Mutero A. Modification of acetylcholinesterase as a mechanism of  
673 resistance to insecticides. *Comparative Biochemistry and Physiology* \108C. 1994:19-31.

674 43. Fournier D. Mutations of acetylcholinesterase which confer insecticide resistance in  
675 insect populations. *Chemico-Biol Intelect.* 2005;157:257-61.

676 44. Baek JH, Kim JI, Lee D-W, Chung BK, Miyata T and Lee SH. Identification and  
677 characterization of ace1-type acetylcholinesterase likely associated with  
678 organophosphate resistance in *Plutella xylostella*. *Pesticide Biochemistry and*  
679 *Physiology.* 2005;81 3:164-75.

680 45. Kim. TopHat2: accurate alignment of transcriptomes in the presence of insertions,  
681 deletions and gene fusions. *Genome biology.* 2013.

682 46. Dermauw W and Van Leeuwen T. The ABC gene family in arthropods: comparative  
683 genomics and role in insecticide transport and resistance. *Insect Biochemistry and*  
684 *Molecular Biology.* 2014;45:89-110.

685 47. Broehan G, Kroeger T, Lorenzen M and Merzendorfer H. Functional analysis of the ATP-  
686 binding cassette (ABC) transporter gene family of *Tribolium castaneum*. *BMC Genomics.*  
687 2013;14 6.

688 48. Grubbs N, Haas S, Beeman RW and Lorenzen MD. The ABCs of eye color in *Tribolium*  
689 *castaneum*: orthologs of the *Drosophila* white, scarlet, and brown Genes. *Genetics.*  
690 2015;199 3:749-59.

691 49. Simon JY. Insect glutathione S-transferases. *Zoological Studies.* 1996;35 1:9-19.

692 50. Che-Mendoza A, Penilla RP and Rodríguez DA. Insecticide resistance and glutathione  
693 S-transferases in mosquitoes: a review. *African Journal of Biotechnology,*. 2009;8 8.

694 51. Corona M and Robinson GE. Genes of the antioxidant system of the honey bee:  
695 annotation and phylogeny. *Insect Molecular Biology.* 2006;15 5:687-701.

1  
2  
3  
4  
5  
6  
7  
8  
9  
10  
11  
12  
13  
14  
15  
16  
17  
18  
19  
20  
21  
22  
23  
24  
25  
26  
27  
28  
29  
30  
31  
32  
33  
34  
35  
36  
37  
38  
39  
40  
41  
42  
43  
44  
45  
46  
47  
48  
49  
50  
51  
52  
53  
54  
55  
56  
57  
58  
59  
60  
61  
62  
63  
64  
65

696 52. Enayati AA, Ranson H and Hemingway J. Insect glutathione transferases and insecticide  
697 resistance. *Insect Molecular Biology*. 14 1:3-8.

698 53. Shi H, Pei L, Gu S, Zhu S, Wang Y and al. e. Glutathione S-transferase (GST) genes in  
699 the red flour beetle, *Tribolium castaneum*, and comparative analysis with five additional  
700 insects. *Genomics*. 2012;100 5:327-35.

701 54. Daborn PJ, Yen JL, Bogwitz MR, Le Goff G, Feil E and al. e. A Single P450 Allele  
702 Associated with Insecticide Resistance in *Drosophila*. *Science*. 2002;297 5590:2253-6.

703 55. Liu N and Scott JG. Increased transcription of CYP6D1 causes cytochrome P450-  
704 mediated insecticide resistance in house fly. *Insect Biochem Molec Biol*. 1998;28:531-5.

705 56. Hardstone MC, Komagata O, Kasai S, Tomita T and Scott JG. Use of isogenic strains  
706 indicates CYP9M10 is linked to permethrin resistance in *Culex pipiens quinquefasciatus*.  
707 *Insect Molec Biol*. 2010;19:717-26.

708 57. Nelson DR, 2018. Cytochrome P450 diversity in the tree of life. *Biochimica et Biophysica*  
709 *Acta (BBA)-Proteins and Proteomics*, 1866(1), pp.141-154. Cytochrome P450 diversity  
710 in the tree of life. *iochimica et Biophysica Acta (BBA)-Proteins and Proteomics*.  
711 2018;1866 1:141-54.

712 58. Gilbert LI. Halloween genes encode P450 enzymes that mediate steroid hormone  
713 biosynthesis in *Drosophila melanogaster*. *Mol Cell Endocrinol*. 2004;215:1-10.

714 59. Feyereisen R. Arthropod CYPomes illustrate the tempo and mode in P450 evolution.  
715 *Biochimica et Biophysica Acta (BBA)-Proteins and Proteomics*. 2011;1841 1:19-28.

716 60. Daborn P, Boundy S, Yen J and Pittendrigh B. DDT resistance in *Drosophila* correlates  
717 with Cyp6g1 over-expression and confers cross-resistance to the neonicotinoid  
718 imidacloprid. *Molecular Genetics and Genomics*. 2001;266 4:556-63.

719 61. Scott JG and Wen Z. Cytochromes P450 of insects: the tip of the iceberg. *Pest*  
720 *management science*. 2001;57 10:958-67.



1  
2  
3  
4  
5  
6  
7  
8  
9  
10  
11  
12  
13  
14  
15  
16  
17  
18  
19  
20  
21  
22  
23  
24  
25  
26  
27  
28  
29  
30  
31  
32  
33  
34  
35  
36  
37  
38  
39  
40  
41  
42  
43  
44  
45  
46  
47  
48  
49  
50  
51  
52  
53  
54  
55  
56  
57  
58  
59  
60  
61  
62  
63  
64  
65

721 62. Pridgeon JW, Zhang L and Liu N. Overexpression of CYP4G19 associated with a  
722 pyrethroid-resistant strain of the German cockroach, *Blattella germanica* (L.). *Genetics*.  
723 2003;314:157-63.

724 63. Oakeshott JG, Claudianos C, Campbell PM, Newcomb RD and Russell RJ. Biochemical  
725 genetics and genomics of insect esterases. In: Gilbert LI, Iatrou K and Gill SS, editors.  
726 *Comprehensive Molecular Insect Science*. Boston: Elsevier; 2005. p. 309-81.

727 64. Montella IR, Schama R and Valle D. The classification of esterases: an important gene  
728 family involved in insecticide resistance-A review. *Memorias do Instituto Oswaldo Cruz*  
729 2012;437-49.

730 65. Bass C and Field LM. Gene amplification and insecticide resistance. *Pest Management*  
731 *Science*. 2011;67:886-90.

732 66. Newcomb RD, Campbell PM, Ollis DL, Cheah E, Russell RJ and Oakeshott JG. A single  
733 amino acid substitution converts a carboxylesterase to an organophosphorus hydrolase  
734 and confers insecticide resistance on a blowfly. *Proceedings of the National Academy of*  
735 *Sciences* 1997;94:7464-8.

736 67. Claudianos C, Ranson H, Johnson RM, Biswas MA and Schuler ea. A deficit of  
737 detoxification enzymes: pesticide sensitivity and environmental response in the  
738 honeybee. *Insect Molecular Biology*. 2006;15 5:615-36.

739 68. Yu QY, Lu C, Li WL, Xiang ZH and Zhang Z. Annotation and expression of  
740 carboxylesterases in the silkworm, *Bombyx mori*. *BMC genomics*. 2009;10 1.

741 69. Ye C, Ma ZS, Cannon CH, Pop M and Yu DW. Exploiting sparseness in de novo  
742 genome assembly. *BMC Bioinformatic*. 2012; doi:10.1186/1471-2105-13-S6-S1.

743 70. Hackl TH, R.; Schultz, J.; Foerster, F. . proovread: large-scale high accuracy PacBio  
744 correction through iterative short read consensus. . 2014.

745 71. Ye C MZ. Sparc: a sparsity-based consensus algorithm for long erroneous sequencing  
746 reads. 2016; doi:10.7717.

1  
2  
3  
4  
5  
6  
7  
8  
9  
10  
11  
12  
13  
14  
15  
16  
17  
18  
19  
20  
21  
22  
23  
24  
25  
26  
27  
28  
29  
30  
31  
32  
33  
34  
35  
36  
37  
38  
39  
40  
41  
42  
43  
44  
45  
46  
47  
48  
49  
50  
51  
52  
53  
54  
55  
56  
57  
58  
59  
60  
61  
62  
63  
64  
65

72. Thibaud-Nissen F, Souvorov A, Murphy T, DiCuccio M and Kitts P. Eukaryotic Genome Annotation Pipeline. The NCBI Handbook, 2nd Edition. Bethesda, MD: National Center for Biotechnology Information (US); 2013.  
<https://www.ncbi.nlm.nih.gov/books/NBK169439/>.

73. Tarver MR, Huang Q, de Guzman L, Rinderer T, Holloway B, Reese J, et al. Transcriptomic and functional resources for the small hive beetle *Aethina tumida*, a worldwide parasite of honey bees. *Genomics Data*. 2016;9:97-9.  
doi:10.1016/j.gdata.2016.06.003.

74. Simão FA, Waterhouse RM, Ioannidis P, Kriventseva EV and Zdobnov EM. BUSCO: assessing genome assembly and annotation completeness with single-copy orthologs. *Bioinformatics* 2015;31 19:3210-2. doi:10.1093/bioinformatics/btv351.

75. Elsiek CG. Finding the missing honey bee genes: lessons learned from a genome upgrade. *BMC Genomics*. 2014;15 86 doi:doi.org/10.1186/1471-2164-15-86.

76. Adams. The genome sequence of *Drosophila melanogaster*. *Science*. 2000.

77. Edgar RC. MUSCLE: multiple sequence alignment with high accuracy and high throughput. *Nucleic Acids Res*. 2004;32 5:1792-7. doi:10.1093/nar/gkh340.

78. Capella-Gutierrez S, Silla-Martinez JM and Gabaldon T. trimAl: a tool for automated alignment trimming in large-scale phylogenetic analyses. *Bioinformatics*. 2009;25:1972-3.

79. Stamatakis A. RAxML Version 8: A tool for Phylogenetic Analysis and Post-Analysis of Large Phylogenies. *Bioinformatics*. 2014.

80. Stöver BC and Müller KF. TreeGraph 2: Combining and visualizing evidence from different phylogenetic analyses. *BMC bioinformatics*. 2010;11 1.

81. Du L, Li D, Zhang X and Yue B. MSDB: a user-friendly program for reporting distribution and building databases of microsatellites from genome sequences. *Journal of Heredity*. 2013;104 1:154-7.

1  
2  
3  
4  
5  
6  
7  
8  
9  
10  
11  
12  
13  
14  
15  
16  
17  
18  
19  
20  
21  
22  
23  
24  
25  
26  
27  
28  
29  
30  
31  
32  
33  
34  
35  
36  
37  
38  
39  
40  
41  
42  
43  
44  
45  
46  
47  
48  
49  
50  
51  
52  
53  
54  
55  
56  
57  
58  
59  
60  
61  
62  
63  
64  
65

773 82. Li H and Durbin R. Fast and accurate short read alignment with Burrows-Wheeler  
774 Transform. Bioinformatics. 2009;25:1754-60.

775 83. McKenna A HM, Banks E, Sivachenko A, Cibulskis K, Kernytsky A, Garimella K,  
776 Altshuler D, Gabriel S, Daly M, DePristo MA. The Genome Analysis Toolkit: a  
777 MapReduce framework for analyzing next-generation DNA sequencing data Genome  
778 Research. 2010;20:1297-303.

779 84. Cingolani P PA, Wang le L, Coon M, Nguyen T, Wang L, Land SJ, Lu X, Ruden DM. A  
780 program for annotating and predicting the effects of single nucleotide polymorphisms,  
781 SnpEff: SNPs in the genome of *Drosophila melanogaster* strain w1118; iso-2; iso-3.  
782 2012;6 2:80-92.

783 85. Abdel-latif M. A Family of Chemoreceptors in *Tribolium castaneum* (Tenebrionidae:  
784 Coleoptera). PLOS ONE. 2007;2 12:e1319. doi:10.1371/journal.pone.0001319.

785 86. McKenna DD, Scully ED, Pauchet Y, Hoover K, Kirsch R, Geib SM, et al. Genome of the  
786 Asian longhorned beetle (*Anoplophora glabripennis*), a globally significant invasive  
787 species, reveals key functional and evolutionary innovations at the beetle–plant  
788 interface. Genome Biology. 2016;17 1:227. doi:10.1186/s13059-016-1088-8.

789 87. Consortium TU. UniProt: the universal protein knowledgebase. Nucleic Acids Res.  
790 2017;45 D1:D158-D69. doi:10.1093/nar/gkw1099.

791 88. Kim HS, Murphy T, Xia J, Caragea D, Park Y, Beeman RW, et al. BeetleBase in 2010:  
792 revisions to provide comprehensive genomic information for *Tribolium castaneum*.  
793 Nucleic Acids Res. 2010;38:D437-D42. doi:10.1093/nar/gkp807.

794 89. Anisimova M and Gascuel O. Approximate likelihood-ratio test for branches: A fast,  
795 accurate, and powerful alternative. Syst Biol. 2006;55 4:539-52.  
796 doi:10.1080/10635150600755453.

1  
2  
3  
4  
5  
6  
7  
8  
9  
10  
11  
12  
13  
14  
15  
16  
17  
18  
19  
20  
21  
22  
23  
24  
25  
26  
27  
28  
29  
30  
31  
32  
33  
34  
35  
36  
37  
38  
39  
40  
41  
42  
43  
44  
45  
46  
47  
48  
49  
50  
51  
52  
53  
54  
55  
56  
57  
58  
59  
60  
61  
62  
63  
64  
65

797 90. Chevenet F, Brun C, Banuls AL, Jacq B and Christen R. TreeDyn: towards dynamic  
798 graphics and annotations for analyses of trees. BMC Bioinformatics. 2006;7:439.  
799 doi:10.1186/1471-2105-7-439.

800 91. Dereeper A, Guignon V, Blanc G, Audic S, Buffet S, Chevenet F, et al. Phylogeny.fr:  
801 robust phylogenetic analysis for the non-specialist. Nucleic Acids Res. 2008;36 Web  
802 Server issue:W465-9. doi:10.1093/nar/gkn180.

803 92. Letunic I and Bork P. Interactive Tree Of Life (iTOL): an online tool for phylogenetic tree  
804 display and annotation. Bioinformatics. 2007;23 1:127-8.  
805 doi:10.1093/bioinformatics/btl529.

806 93. Kumar S, Stecher G and Tamura K. MEGA7: Molecular Evolutionary Genetics Analysis  
807 version 7.0 for bigger datasets. Molecular biology and evolution. 2016:msw054.

808 94. Hall BG. Building Phylogenetic Trees from Molecular Data with MEGA. Molecular  
809 Biology and Evolution. 2013;30 5:1229-35.

810 95. Evans JD; McKenna D; Scully E; Cook SC; Dainat B; Egekwu N; Grubbs N; Lopez D;  
811 Lorenzen MD; Reyna SM; Rinkevich FD; Neumann P; Huang Q: Supporting data for the  
812 "Genome of the small hive beetle (*Aethina tumida*, Coleoptera: Nitidulidae), a worldwide  
813 parasite of social bee colonies, provides insights into detoxification and herbivory"  
814 *GigaScience* Database. 2018. <http://dx.doi.org/10.5524/100511>

815 96. Bateman A. The Pfam protein families database. Nucleic Acids Res. 2002;30:276-80.

816 97. Letunic I and Bork P. Interactive tree of life (iTOL) v3: an online tool for the display and  
817 annotation of phylogenetic and other trees. Nucleic Acids Res. 2016;44 W1:W242-W5.

1  
2  
3  
4 818  
5  
6 819  
7  
8  
9 820  
10  
11 821  
12  
13  
14  
15  
16  
17  
18  
19  
20  
21  
22  
23  
24  
25  
26  
27  
28  
29  
30  
31  
32  
33  
34  
35  
36  
37  
38  
39  
40  
41  
42  
43  
44  
45  
46  
47  
48  
49  
50  
51  
52  
53  
54 822  
55  
56 823  
57  
58 824  
59  
60  
61  
62  
63  
64  
65

**Tables**

**Table 1.** Assembly statistics of the small hive beetle genome assembly

|                                           |        |
|-------------------------------------------|--------|
| Illumina (genome coverage)                | 535    |
| PacBio (genome coverage)                  | 50     |
| Assembly size (Mbp)                       | 234.3  |
| Number of contigs                         | 3063   |
| Largest contig (Kbp)                      | 2683.7 |
| Smallest contig (Kbp)                     | 1.26   |
| N50 (Kbp)                                 | 298.8  |
| Number of contig > 10 Kbp                 | 2236   |
| Number of contig > N50                    | 192    |
| Number of protein coding genes            | 14076  |
| Number of mRNAs                           | 17463  |
| Density of SNPs (bps per SNP position)    | 177    |
| Density of microsatellites (loci per Kbp) | 8.23   |

1  
2  
3  
4  
5  
6  
7  
8  
9  
10  
11  
12  
13  
14  
15  
16  
17  
18  
19  
20  
21  
22  
23  
24  
25  
26  
27  
28  
29  
30  
31  
32  
33  
34  
35  
36  
37  
38  
39  
40  
41  
42  
43  
44  
45  
46  
47  
48  
49  
50  
51  
52  
53  
54  
55  
56  
57  
58  
59  
60  
61  
62  
63  
64  
65

825  
826  
827  
828  
829  
830

**Table 2.** The number of gustatory receptor (GR) genes from major groups for three coleopteran species; the small hive beetle, ATUMI, AGLAB, and TCAST and their putative coding for detecting either bitter or sweet tastants.

| Species      | Gustatory receptor group |    |       |     |       | Tastant type |        |       |
|--------------|--------------------------|----|-------|-----|-------|--------------|--------|-------|
|              | 2a                       | 5a | 28a/b | 43a | 64a-f | Total        | Bitter | Sweet |
| <b>AGLAB</b> | 11                       | 1  | 7     | 1   | 6     | 26           | 19     | 7     |
| <b>ATUMI</b> | 3                        | 0  | 2     | 2   | 4     | 11           | 5      | 6     |
| <b>TCAST</b> | 12                       | 3  | 30    | 12  | 14    | 71           | 42     | 29    |

831  
832

833 Table 3. Evaluation of resistance mutations in acetylcholine esterase and their status in ATUMI.

834 *Torpedo* Ace position number, the resistance mutations are described in [43].

| <i>Torpedo</i><br>Position | Ace<br>Position | ATUMI_Ace1 | Resistance Mutations | ATUMI_Ace1<br>State |
|----------------------------|-----------------|------------|----------------------|---------------------|
| <b>119</b>                 | 189             |            | G247S, G119D         | G                   |
| <b>128</b>                 | 198             |            | D237E                | D                   |
| <b>201</b>                 | 270             |            | A302S                | A                   |
| <b>227</b>                 | 296             |            | G265A, G262A         | G                   |
| <b>290</b>                 | 358             |            | F290V                | F                   |
| <b>331</b>                 | 399             |            | S431F, F445W, F439C  | F                   |
| <hr/>                      |                 |            |                      |                     |
| <i>Torpedo</i><br>Position | Ace<br>Position | ATUMI_Ace2 | Resistance Mutations | ATUMI_Ace2<br>State |
| <b>78</b>                  | 114             |            | F139L, F115S         | F                   |
| <b>82</b>                  | 118             |            | E81K                 | E                   |
| <b>129</b>                 | 177             |            | I161V/T              | I                   |
| <b>151</b>                 | 198             |            | V180L                | I                   |
| <b>227</b>                 | 280             |            | G265A, G262A/V       | G                   |
| <b>238</b>                 | 290             |            | S291G                | T                   |

1  
2  
3  
4  
5  
6  
7  
8  
9  
10  
11  
12  
13  
14  
15  
16  
17  
18  
19  
20  
21  
22  
23  
24  
25  
26  
27  
28  
29  
30  
31  
32  
33  
34  
35  
36  
37  
38  
39  
40  
41  
42  
43  
44  
45  
46  
47  
48  
49  
50  
51  
52  
53  
54  
55  
56  
57  
58  
59  
60  
61  
62  
63  
64  
65

|            |     |              |   |
|------------|-----|--------------|---|
| <b>290</b> | 358 | F330Y, F237Y | F |
| <b>328</b> | 383 | G365A, G368A | G |
| <b>396</b> | 452 | G488S        | G |

836

837



1  
2  
3  
4  
5  
6  
7  
8  
9  
10  
11  
12  
13  
14  
15  
16  
17  
18  
19  
20  
21  
22  
23  
24  
25  
26  
27  
28  
29  
30  
31  
32  
33  
34  
35  
36  
37  
38  
39  
40  
41  
42  
43  
44  
45  
46  
47  
48  
49  
50  
51  
52  
53  
54  
55  
56  
57  
58  
59  
60  
61  
62  
63  
64  
65

**Table 4:** Numbers of ABC genes in each species, by subfamily. \*  
lower counts discussed in text.

| Species | Subfamily |   |    |   |   |   |     |   | Total |
|---------|-----------|---|----|---|---|---|-----|---|-------|
|         | A         | B | C  | D | E | F | G   | H |       |
| ATUMI   | 4*        | 6 | 24 | 2 | 1 | 3 | 13* | 3 | 56    |
| TCAST   | 10        | 6 | 35 | 2 | 1 | 3 | 14  | 3 | 74    |
| DMELA   | 10        | 8 | 14 | 2 | 1 | 3 | 15  | 3 | 56    |

838

839

1  
2  
3  
4 840 Table 5. Comparison of the number of GSTs between ATUMI, AMELL, DMELA, and TCAST [53],  
5  
6 841 [67].  
7

| GST Class           | ATUMI | AMELL | DMELA | TCAST |
|---------------------|-------|-------|-------|-------|
| <b>Delta</b>        | 3     | 1     | 11    | 3     |
| <b>Epsilon</b>      | 19    | 0     | 14    | 19    |
| <b>Omega</b>        | 1     | 1     | 5     | 3     |
| <b>Sigma</b>        | 7     | 4     | 1     | 7     |
| <b>Theta</b>        | 1     | 1     | 4     | 1     |
| <b>Zeta</b>         | 5     | 1     | 2     | 1     |
| <b>Microsomal</b>   | 6     | 2     | 1     | 5     |
| <b>Unclassified</b> | 7     | 0     | 0     | 2     |
| <b>Total</b>        | 49    | 10    | 38    | 41    |

8  
9  
10  
11  
12  
13  
14  
15  
16  
17  
18  
19  
20  
21  
22  
23  
24  
25  
26  
27  
28  
29  
30  
31  
32  
33  
34  
35  
36  
37  
38  
39  
40 842

41  
42 843

43  
44 844  
45  
46  
47  
48  
49  
50  
51  
52  
53  
54  
55  
56  
57  
58  
59  
60  
61  
62  
63  
64  
65

1  
2  
3  
4  
5  
6  
7  
8  
9  
10  
11  
12  
13  
14  
15  
16  
17  
18  
19  
20  
21  
22  
23  
24  
25  
26  
27  
28  
29  
30  
31  
32  
33  
34  
35  
36  
37  
38  
39  
40  
41  
42  
43  
44  
45  
46  
47  
48  
49  
50  
51  
52  
53  
54  
55  
56  
57  
58  
59  
60  
61  
62  
63  
64  
65

845 Table 6. Comparison of CYP450 genes in ATUMI, AMELL, DMELA, and TCAST.

| <b>P450 Clan</b>     | <b>ATUMI</b> | <b>AMELL</b> | <b>DMELA</b> | <b>TCAST</b> |
|----------------------|--------------|--------------|--------------|--------------|
| <b>CYP2</b>          | 8            | 8            | 6            | 8            |
| <b>CYP3</b>          | 55           | 28           | 36           | 82           |
| <b>CYP4</b>          | 43           | 4            | 32           | 49           |
| <b>Mitochondrial</b> | 10           | 6            | 11           | 10           |
| <b>Total</b>         | 116          | 46           | 85           | 149          |

846  
847  
848  
849

1  
2  
3  
4 850 Table 7. Comparison of COE from *Aethina tumida* to *Drosophila melanogaster*, *Tribolium*  
5  
6 851 *castaneum*, and *Apis mellifera*. Nomenclature and gene counts follow McKenna 2016 [12] and  
7  
8 852 Claudianos 2006. [67].  
9

| COE Subfamily                                         | <i>ATUMI</i> | <i>AMELL</i> | <i>DMELA</i> | <i>TCAST</i> |
|-------------------------------------------------------|--------------|--------------|--------------|--------------|
| <b>Clades A-C (Dietary)</b>                           | 27           | 8            | 13           | 55           |
| <b>Clade D (Integument Esterases)</b>                 | 2            | 1            | 3            | 5            |
| <b>Clade E (Secreted <math>\beta</math>-esterase)</b> | 8            | 3            | 3            | 10           |
| <b>Clade F (JH Esterases)</b>                         | 3            | 1            | 2            | 1            |
| <b>Clade H (Glutactins)</b>                           | 2            | 0            | 4            | 2            |
| <b>Clade I (Unknown Function)</b>                     | 1            | 2            | 2            | 2            |
| <b>Clade J (Acetylcholinesterases)</b>                | 2            | 2            | 1            | 2            |
| <b>Clade K (Glotactin)</b>                            | 1            | 1            | 1            | 2            |
| <b>Clade L (Neuroligins)</b>                          | 10           | 5            | 4            | 5            |
| <b>Clade M (Neurotactins)</b>                         | 4            | 1            | 2            | 1            |
| <b>Total</b>                                          | 60           | 24           | 35           | 85           |

10  
11  
12  
13  
14  
15  
16  
17  
18  
19  
20  
21  
22  
23  
24  
25  
26  
27  
28  
29  
30  
31  
32  
33  
34  
35  
36  
37  
38  
39  
40  
41  
42  
43  
44  
45  
46  
47  
48  
49  
50  
51  
52  
53  
54  
55 853

56  
57 854  
58  
59  
60  
61  
62  
63  
64  
65

1  
2  
3  
4  
5  
6  
7  
8  
9  
10  
11  
12  
13  
14  
15  
16  
17  
18  
19  
20  
21  
22  
23  
24  
25  
26  
27  
28  
29  
30  
31  
32  
33  
34  
35  
36  
37  
38  
39  
40  
41  
42  
43  
44  
45  
46  
47  
48  
49  
50  
51  
52  
53  
54  
55  
56  
57  
58  
59  
60  
61  
62  
63  
64  
65

855 **Figure Legends**

856  
857 **Figure 1.** *Aethina tumida* (A) adult and (B) larva. Photos courtesy of Alex Wild Photography, used  
858 with permission.

859  
860 **Figure 2. Phylogenetic tree and estimated completeness of the genomes of 11 insect**  
861 **species.** A) The phylogenetic tree was constructed on protein sequences of 181 single copy  
862 orthologs shared among all 11 insect species. All nodes have 100% bootstrap support. AMELL  
863 and DMELA were used as outgroups. Branch lengths are shown for each node. B) Completeness  
864 of official protein sets of each insect species were assessed by aligning to the Endopterygota sets  
865 of benchmarking universal single-copy orthologs (BUSCOs). For ATUMI, 97.5% of complete  
866 BUSCOs were found. C) The pervasiveness of gene loss during endopterygote evolution. From  
867 the domain counts of lost BUSCOs, methyltransferase (MT), glycosyltransferase (GT) and leucine  
868 rich repeats (LRR) are among the top 5% of total domains and are commonly lost from multiple  
869 species. WD and ZF red boxes indicate that the gene is lost, while white boxes indicate that the  
870 gene is maintained in each species.

871  
872 **Figure 3. Gene duplication events plotted against the average gene duplication event per**  
873 **gene.** The protein sets of the 11 studied beetle species, as well as honey bee and fruit fly were  
874 searched against the Endopterygota BUSCO set using BLAST. Redundant proteins (including  
875 recent paralogs and those with known alternative splicing) were used to quantify the average  
876 number of duplication events per gene in each species.

877  
878 **Figure 4. Glycoside hydrolase (GH) family copy numbers identified from beetle genomes.**  
879 Genes coding for glycoside hydrolases were identified using Pfam domain assignments [96] and  
880 genome assemblies and coding gene predictions were obtained from NCBI (GenBank Accession

1  
2  
3  
4 881 Numbers: GCA\_000390285.1 AGLAB, GCA\_000355655.1 DPOND, GCA\_001412225.1 *N.*  
5  
6 882 *vespilloides*, GCA\_001443705.1 *O. borbonicus*, GCA\_000002335.3 TCAST) with the exception  
7  
8  
9 883 of *H.s hampei*, which was downloaded from <https://genome.med.nyu.edu/coffee-beetle/cbb.html>.  
10  
11 884 Families are color coded from green to red based on their relative abundance (total count/total  
12  
13 885 number of GH genes) with red representing GH families that are highly abundant ( $\geq 25\%$  of the  
14  
15 886 total GH genes) and green representing GH families of lesser abundance ( $\leq 0.01\%$ ). Notably, the  
16  
17 887 GH profiles of ATUMI and TCAST (neither of which feed on living plant material) differ strongly  
18  
19 888 from the GH profiles of the phytophagous beetles, even though they all belong to the same  
20  
21 889 infraorder, suggesting that diet, in part, might be driving the differences in GH family members  
22  
23 890 and copy numbers. AGLAB=Asian longhorned beetle (*A. glabripennis*); HHAMP=Coffee berry  
24  
25 891 borer (*H. hampei*); DPOND=Mountain pine beetle (*D. ponderosae*); NVESP=burying beetle (*N.*  
26  
27 892 *vespilloides*); OBORB=scarab beetle (*O. borbonicus*); ATUMI=small hive beetle, and TCAST=red  
28  
29 893 flour beetle (TCAST).  
30  
31  
32  
33 894

35 895 **Figure 5. Maximum likelihood cladogram for gustatory receptor genes from three**  
36  
37 896 **coleopteran species.** The small hive beetle, *Aethina tumida* (ATUMI; green labels/lines), the  
38  
39 897 Asian long horned beetle, *Anoplophora glabripennis* (Agl; red labels/lines), and the red flour  
40  
41 898 beetle, *Tribolium castaneum* (TCAST; blue labels/lines). Individual genes are labeled with species  
42  
43 899 identifier and GenBank accession number. Scale bar for branch lengths represents 0.1 amino  
44  
45 900 acid substitutions per site. Ring around cladogram indicates gene families coded for perceiving  
46  
47 901 bitter (yellow) and sweet (pink) tastants.  
48  
49  
50  
51 902

53 903 **Figure 6. Maximum likelihood phylogenetic tree of ABC proteins from ATUMI (At), TCAST**  
54  
55 904 **(Tc), and DMELA (Dm).** ATUMI genes are marked in blue, TCAST in green, and DMELA in  
56  
57 905 purple. ABC subfamilies are indicated with colored lines to the right of the tree. Names for DMELA  
58  
59 906 proteins were taken from Flybase (<http://flybase.org/reports/FBgg0000552>), and include the  
60  
61  
62  
63  
64  
65

1  
2  
3  
4  
5  
6  
7  
8  
9  
10  
11  
12  
13  
14  
15  
16  
17  
18  
19  
20  
21  
22  
23  
24  
25  
26  
27  
28  
29  
30  
31  
32  
33  
34  
35  
36  
37  
38  
39  
40  
41  
42  
43  
44  
45  
46  
47  
48  
49  
50  
51  
52  
53  
54  
55  
56  
57  
58  
59  
60  
61  
62  
63  
64  
65

Flybase number for reference. TCAST names are taken from the two papers in which the genes were identified [47, 48], with the NCBI Refseq accession number provided for reference. ATUMI names were generated for this paper by combining the subfamily of the identified sequence with the scaffold on which the encoding gene may be found; if multiple ABC genes of a particular subfamily were found on the same scaffold, the sequences were given an additional letter designation based on their relative location, reading left to right on the scaffold as shown in WebApollo. For reference, the scaffold number and base coordinates for the gene have also been included.

**Figure 7. Maximum Likelihood phylogenetic tree of glutathione-S-transferase (GST) proteins.** The bootstrap consensus tree inferred from 1000 replicates is taken to represent the evolutionary history of the taxa *A. tumida* (ATUMI) in green; *A. mellifera* (AMELL) in black; *D. melanogaster* (DMELA) in blue; and *T. castaneum* (TCAST) in red identified manually using the Uniprot and Pfam databases. Branches corresponding to partitions reproduced in less than 50% bootstrap replicates are collapsed. Initial tree(s) for the heuristic search were obtained automatically by applying Neighbor-Join and BioNJ algorithms to a matrix of pairwise distances estimated using a JTT model, and then selecting the topology with superior log likelihood value. All positions with less than 95% site coverage were eliminated. The tree was annotated and visualized with the iTOL web tool ([itol.embl.de/](http://itol.embl.de/)) [97].

**Figure 8. Maximum Likelihood phylogenetic tree of the cytochrome P450 detoxification system.** The bootstrap consensus tree inferred from 1000 replicates is taken to represent the evolutionary history of the taxa *A. tumida* (ATUMI) in green; *A. mellifera* (AMELL) in black; *D. melanogaster* (DMELA) in blue; and *T. castaneum* (TCAST) in red identified manually using the Uniprot and Pfam databases. Branches corresponding to partitions reproduced in less than 50% bootstrap replicates are collapsed. Initial tree(s) for the heuristic search were obtained

1  
2  
3  
4  
5  
6  
7  
8  
9  
10  
11  
12  
13  
14  
15  
16  
17  
18  
19  
20  
21  
22  
23  
24  
25  
26  
27  
28  
29  
30  
31  
32  
33  
34  
35  
36  
37  
38  
39  
40  
41  
42  
43  
44  
45  
46  
47  
48  
49  
50  
51  
52  
53  
54  
55  
56  
57  
58  
59  
60  
61  
62  
63  
64  
65

933 automatically by applying Neighbor-Join and BioNJ algorithms to a matrix of pairwise distances  
934 estimated using a JTT model, and then selecting the topology with superior log likelihood value.  
935 All positions with less than 95% site coverage were eliminated. P450s are clustered to CYP2,  
936 CYP3, CYP4 and mitochondrial clans. The tree was annotated and visualized with the iTOL web  
937 tool ([itol.embl.de/](http://itol.embl.de/)) [97].

938

**Figure 9. Maximum likelihood phylogenetic tree of carboxylesterase (COE) genes.** The  
939 maximum likelihood bootstrap consensus tree (1000 replicates) showing the relationships among  
940 COE genes from the genomes of *A. tumida* (ATUMI) in green; *A. mellifera* (AMELL) in black; *D.*  
941 *melanogaster* (DMELA) in blue; and *T. castaneum* (TCAST) in red, identified manually using the  
942 Uniprot and Pfam databases. Branches corresponding to partitions recovered in less than 50%  
943 of bootstrap replicates are collapsed. Starting tree(s) for the heuristic search were obtained  
944 automatically using neighbor-joining and BioNJ algorithms applied to a matrix of pairwise  
945 distances estimated using a JTT model, and then selecting the topology with the superior log  
946 likelihood value. All positions with less than 95% site coverage were eliminated. The  
947 phylogenetically distinct clusters were named according to established nomenclature for COE  
948 genes [12]. The tree was annotated and visualized with the iTOL web tool [96].

950



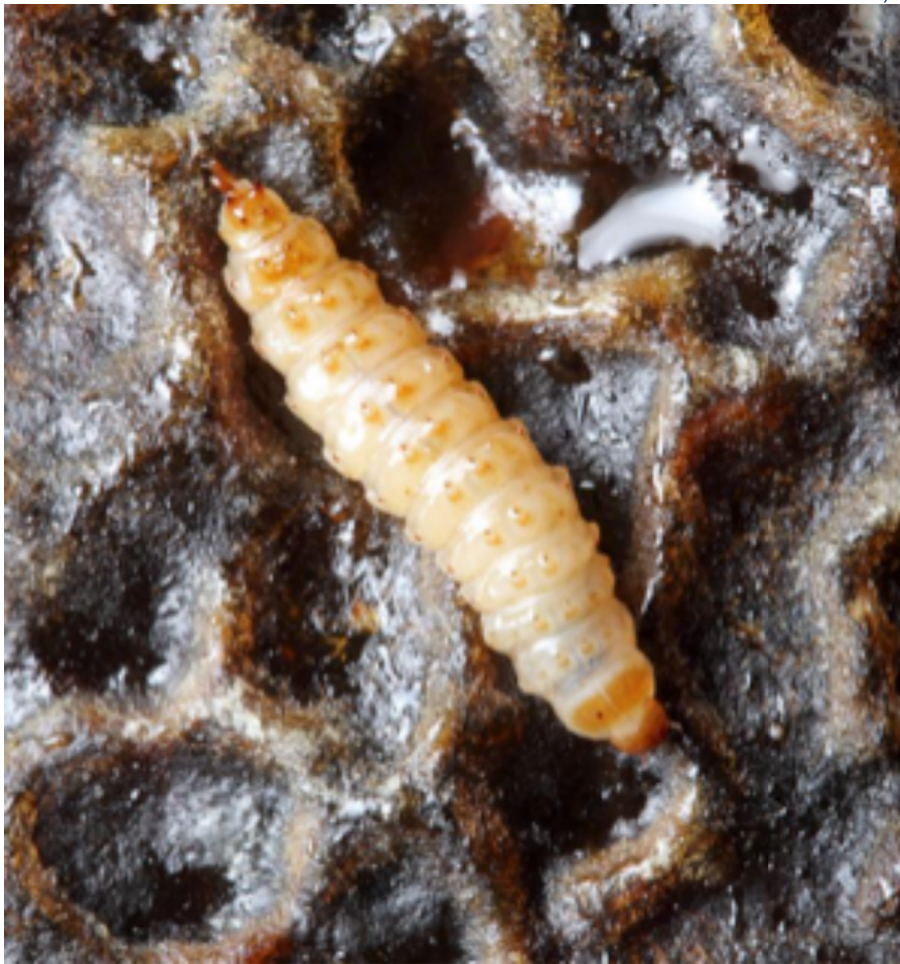

**B**

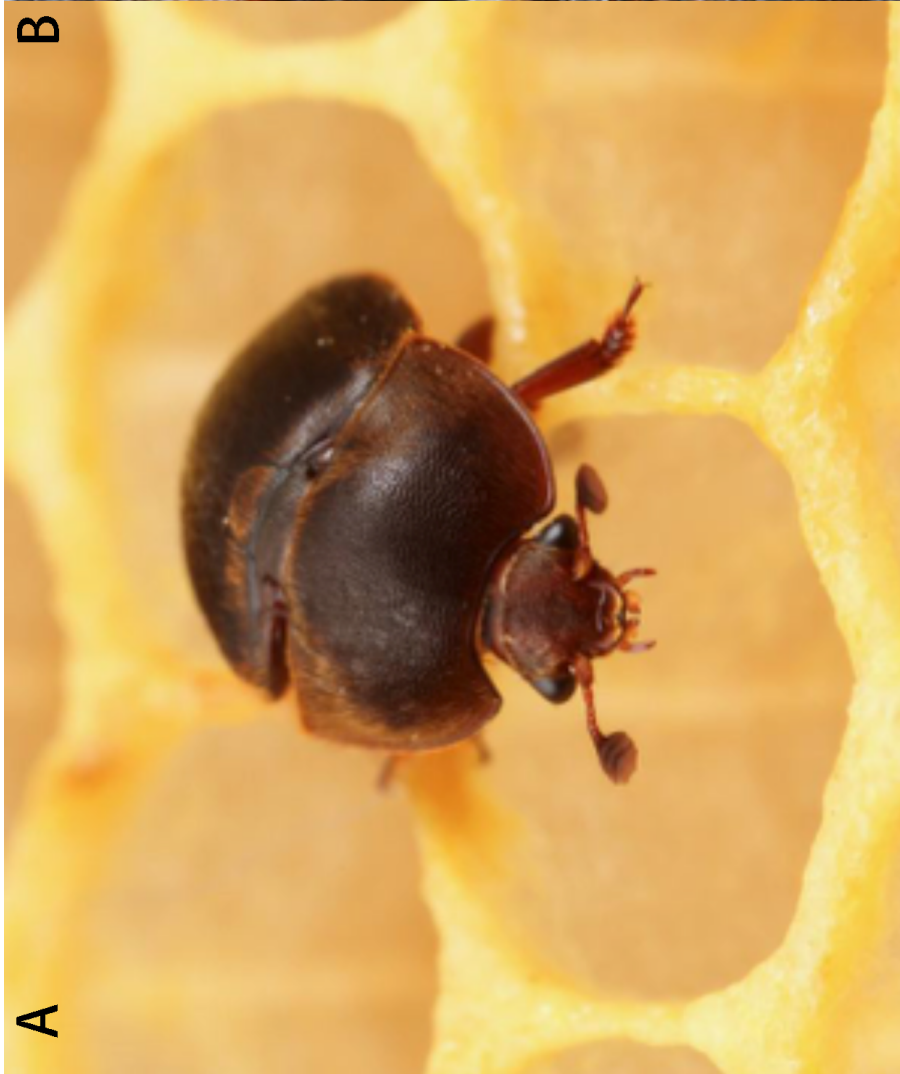

**A**

Figure 1

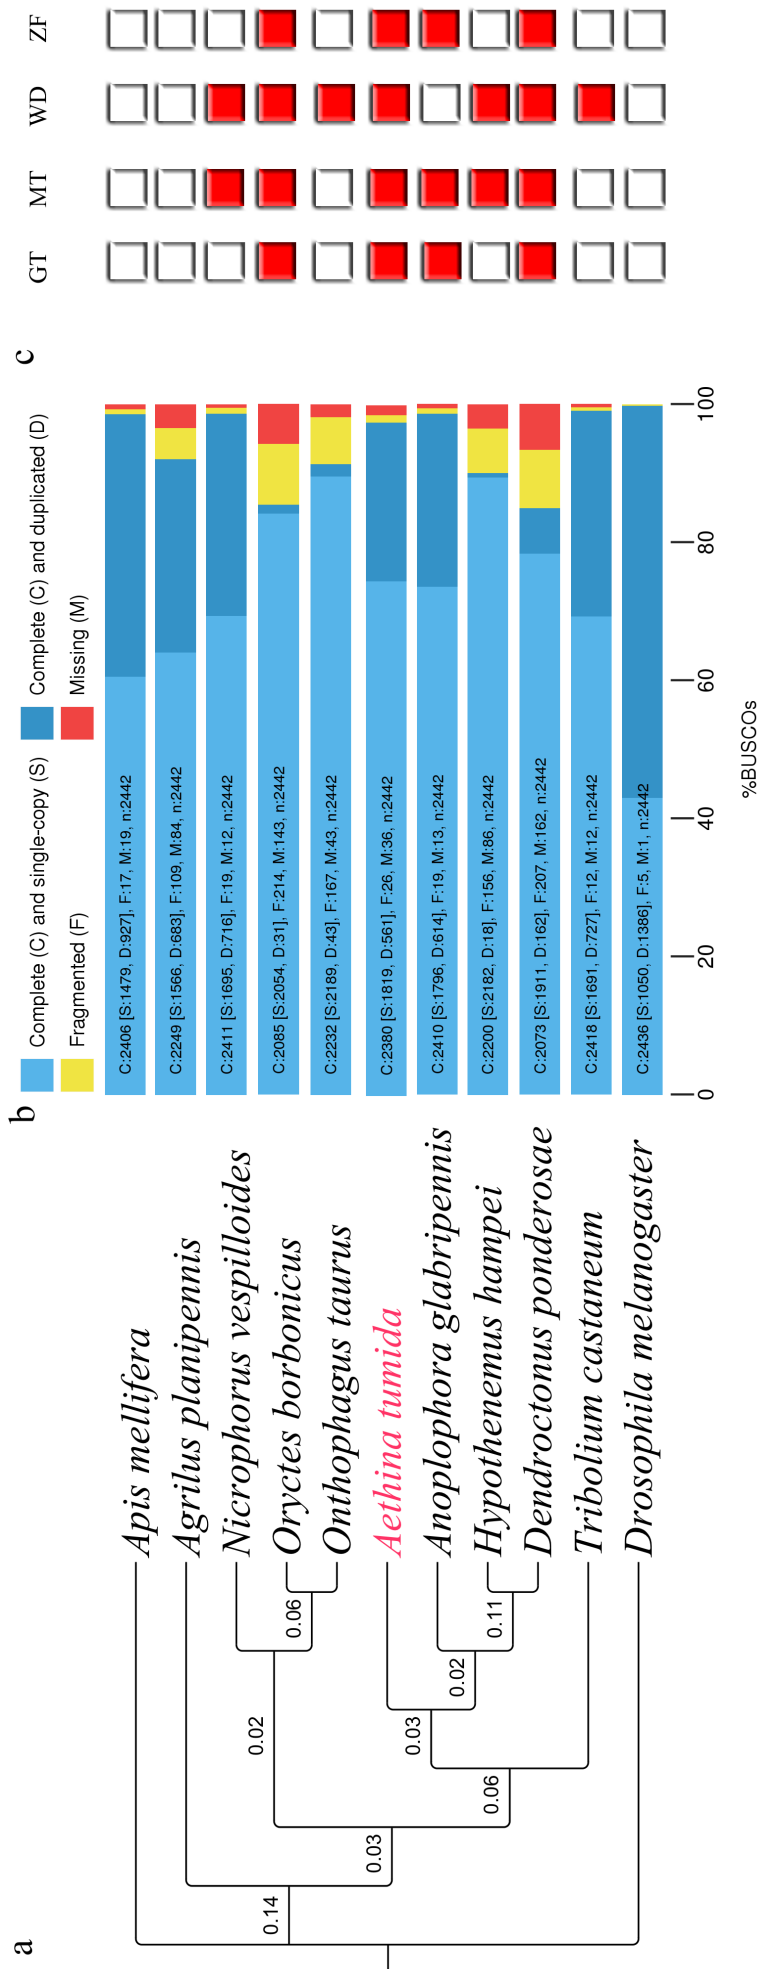

Figure 2

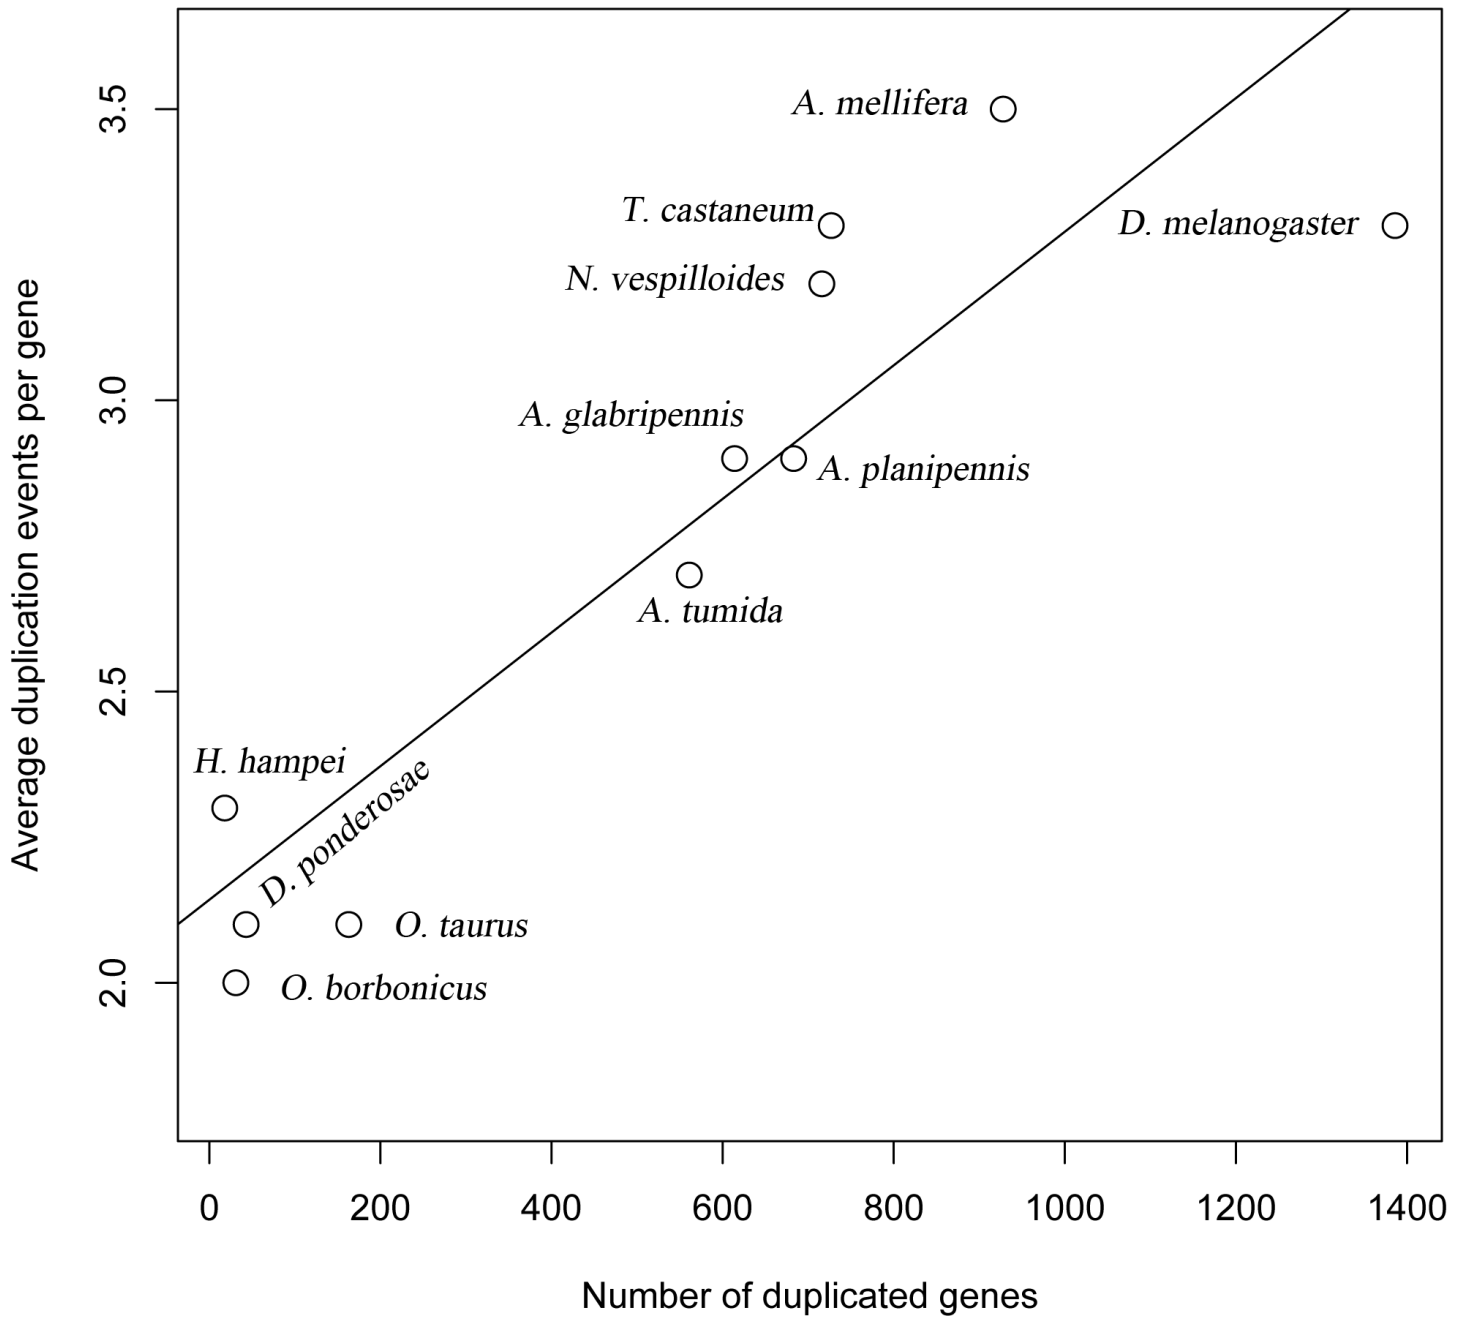

Figure 3

The dendrogram at the top of the table shows a hierarchical clustering of 32 GH families. The tree splits into two main clusters. The left cluster, labeled 'Phytophagous', contains 19 families (GH1, GH2, GH5, GH9, GH10, GH13, GH15, GH16, GH18, GH20, GH22, GH28, GH30, GH31, GH32, GH35, GH37, GH38, GH39, GH45, GH47, GH48, GH63, GH67, GH79, GH85, GH99). The right cluster, labeled 'Other', contains 13 families (GH1, GH2, GH5, GH9, GH10, GH13, GH15, GH16, GH18, GH20, GH22, GH28, GH30, GH31, GH32, GH35, GH37, GH38, GH39, GH45, GH47, GH48, GH63, GH67, GH79, GH85, GH99).

| Family       | ALB                 | CBB        | DPOND      | NIC          | ORY       | SHB       | TCAS      |
|--------------|---------------------|------------|------------|--------------|-----------|-----------|-----------|
| GH1          | 59                  | 21         | 25         | 8            | 2         | 8         | 13        |
| GH2          | 5                   | 2          | 3          | 8            | 1         | 5         | 6         |
| GH5          | 6                   | 2          | 2          | 0            | 0         | 0         | 0         |
| GH9          | 1                   | 0          | 0          | 1            | 1         | 0         | 1         |
| GH10         | 0                   | 2          | 0          | 0            | 0         | 0         | 0         |
| GH13         | 1                   | 0          | 0          | 0            | 0         | 0         | 0         |
| GH15         | 2                   | 2          | 2          | 4            | 1         | 3         | 2         |
| GH16         | 4                   | 5          | 11         | 1            | 3         | 7         | 3         |
| GH18         | 25                  | 19         | 11         | 18           | 13        | 18        | 22        |
| GH20         | 8                   | 8          | 10         | 14           | 8         | 8         | 10        |
| GH22         | 7                   | 0          | 0          | 0            | 0         | 0         | 0         |
| GH28         | 17                  | 7          | 23         | 0            | 0         | 0         | 0         |
| GH30         | 7                   | 1          | 2          | 3            | 1         | 8         | 5         |
| GH31         | 17                  | 6          | 10         | 6            | 7         | 11        | 8         |
| GH32         | 2                   | 0          | 2          | 0            | 0         | 0         | 0         |
| GH35         | 10                  | 5          | 10         | 3            | 0         | 4         | 4         |
| GH37         | 7                   | 0          | 0          | 0            | 0         | 0         | 0         |
| GH38         | 10                  | 7          | 7          | 7            | 5         | 10        | 11        |
| GH39         | 1                   | 0          | 0          | 1            | 0         | 1         | 1         |
| GH45         | 2                   | 3          | 9          | 0            | 0         | 0         | 0         |
| GH47         | 4                   | 4          | 4          | 5            | 3         | 6         | 4         |
| GH48         | 1                   | 4          | 8          | 0            | 0         | 0         | 0         |
| GH63         | 1                   | 1          | 1          | 1            | 1         | 0         | 1         |
| GH67         | 0                   | 0          | 0          | 0            | 0         | 0         | 1         |
| GH79         | 1                   | 1          | 1          | 2            | 1         | 1         | 1         |
| GH85         | 1                   | 1          | 1          | 1            | 0         | 1         | 1         |
| GH99         | 0                   | 0          | 0          | 1            | 0         | 0         | 1         |
| <b>Total</b> | <b>199</b>          | <b>101</b> | <b>142</b> | <b>84</b>    | <b>47</b> | <b>91</b> | <b>95</b> |
|              | <b>Phytophagous</b> |            |            | <b>Other</b> |           |           |           |

Figure 4



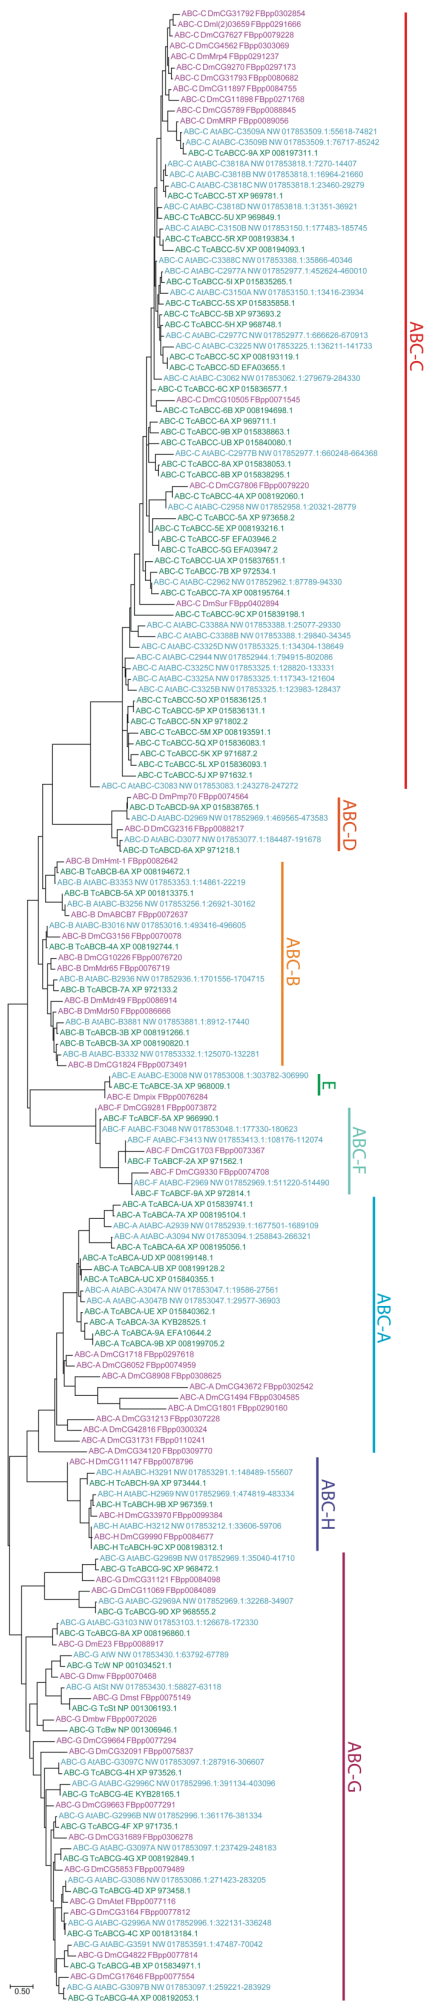

Figure 6

# COE Classification

- Clade D: Integument Esterases
- Clade E: B- and Pheromone Esterases
- Clade F: Juvenile Hormone Esterases
- Clade H: Glutatactins
- Clade I: Unknown Function
- Clade J: Acetylcholinesterases
- Clade K: Gliotactins
- Clade L: Neuroligins
- Clade M: Neurtactins

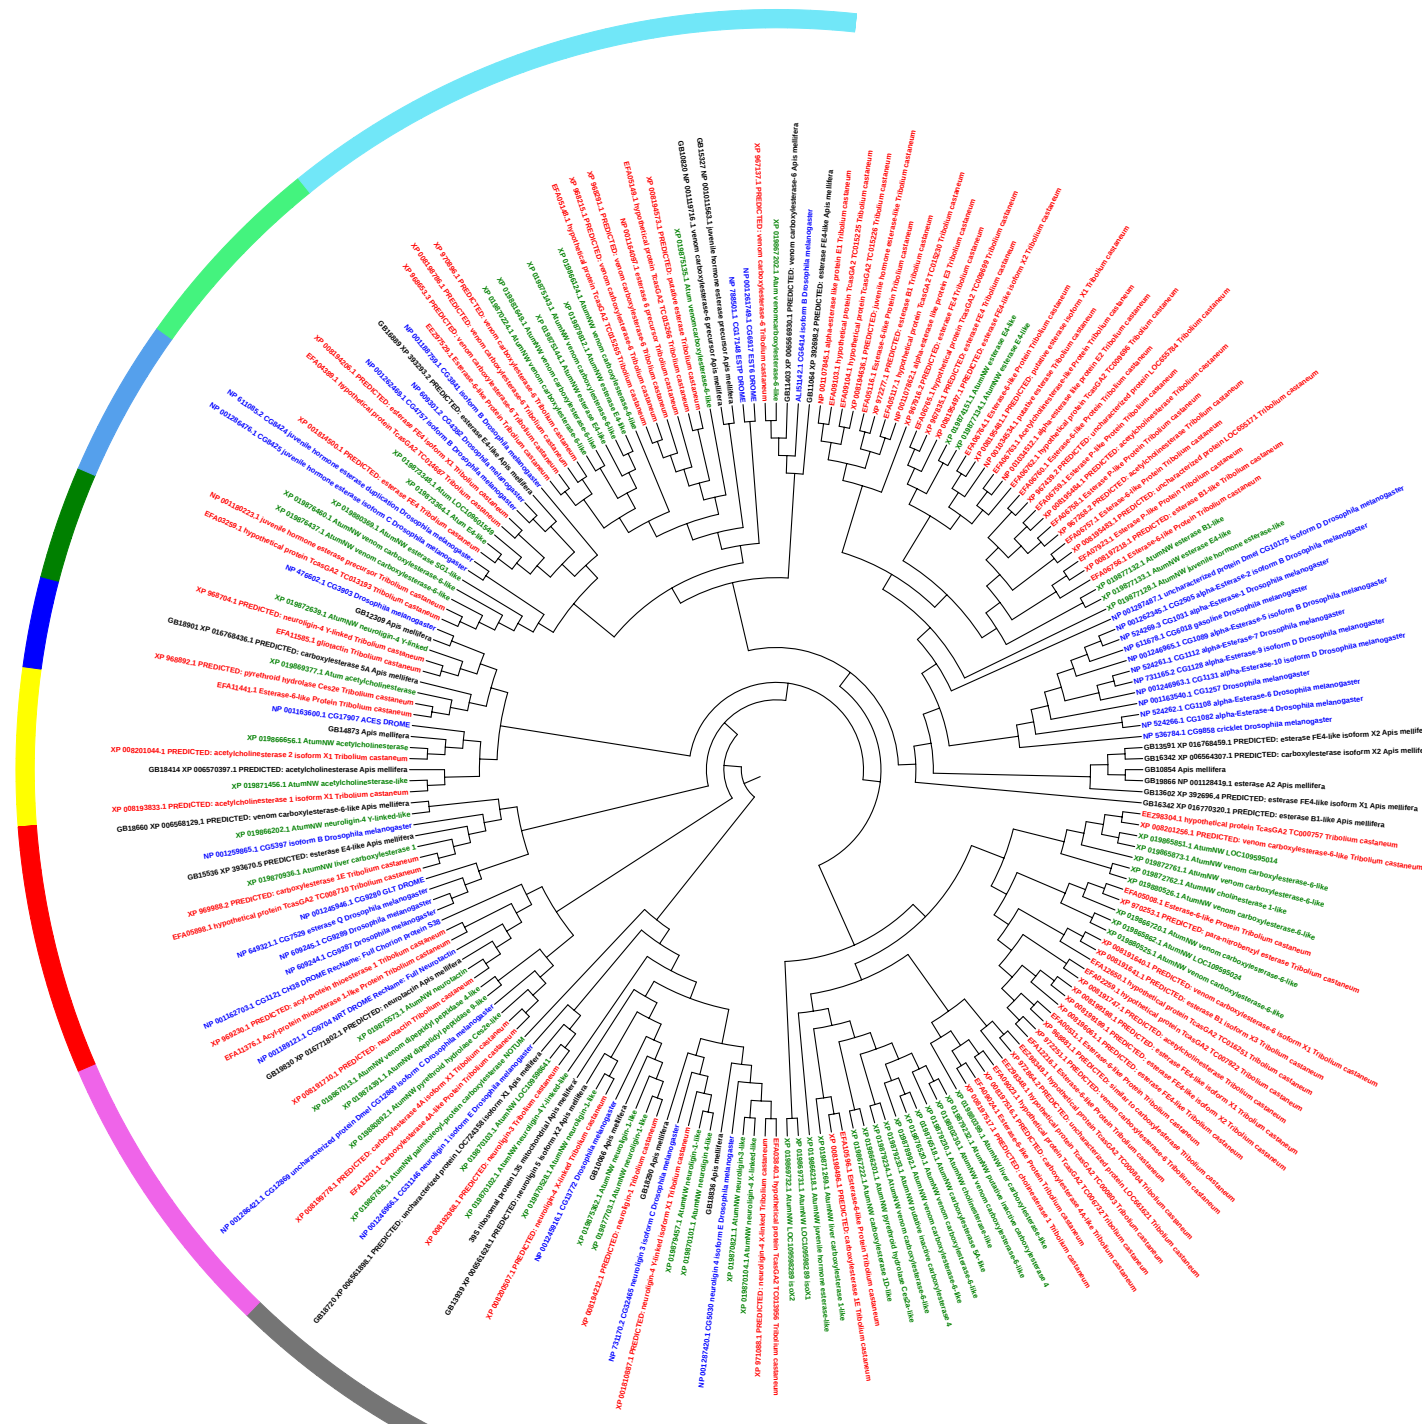

Figure 9

# P450 Clans

- Mitochondrial
- CYP2 Clan
- CYP3 Clan
- CYP4 Clan

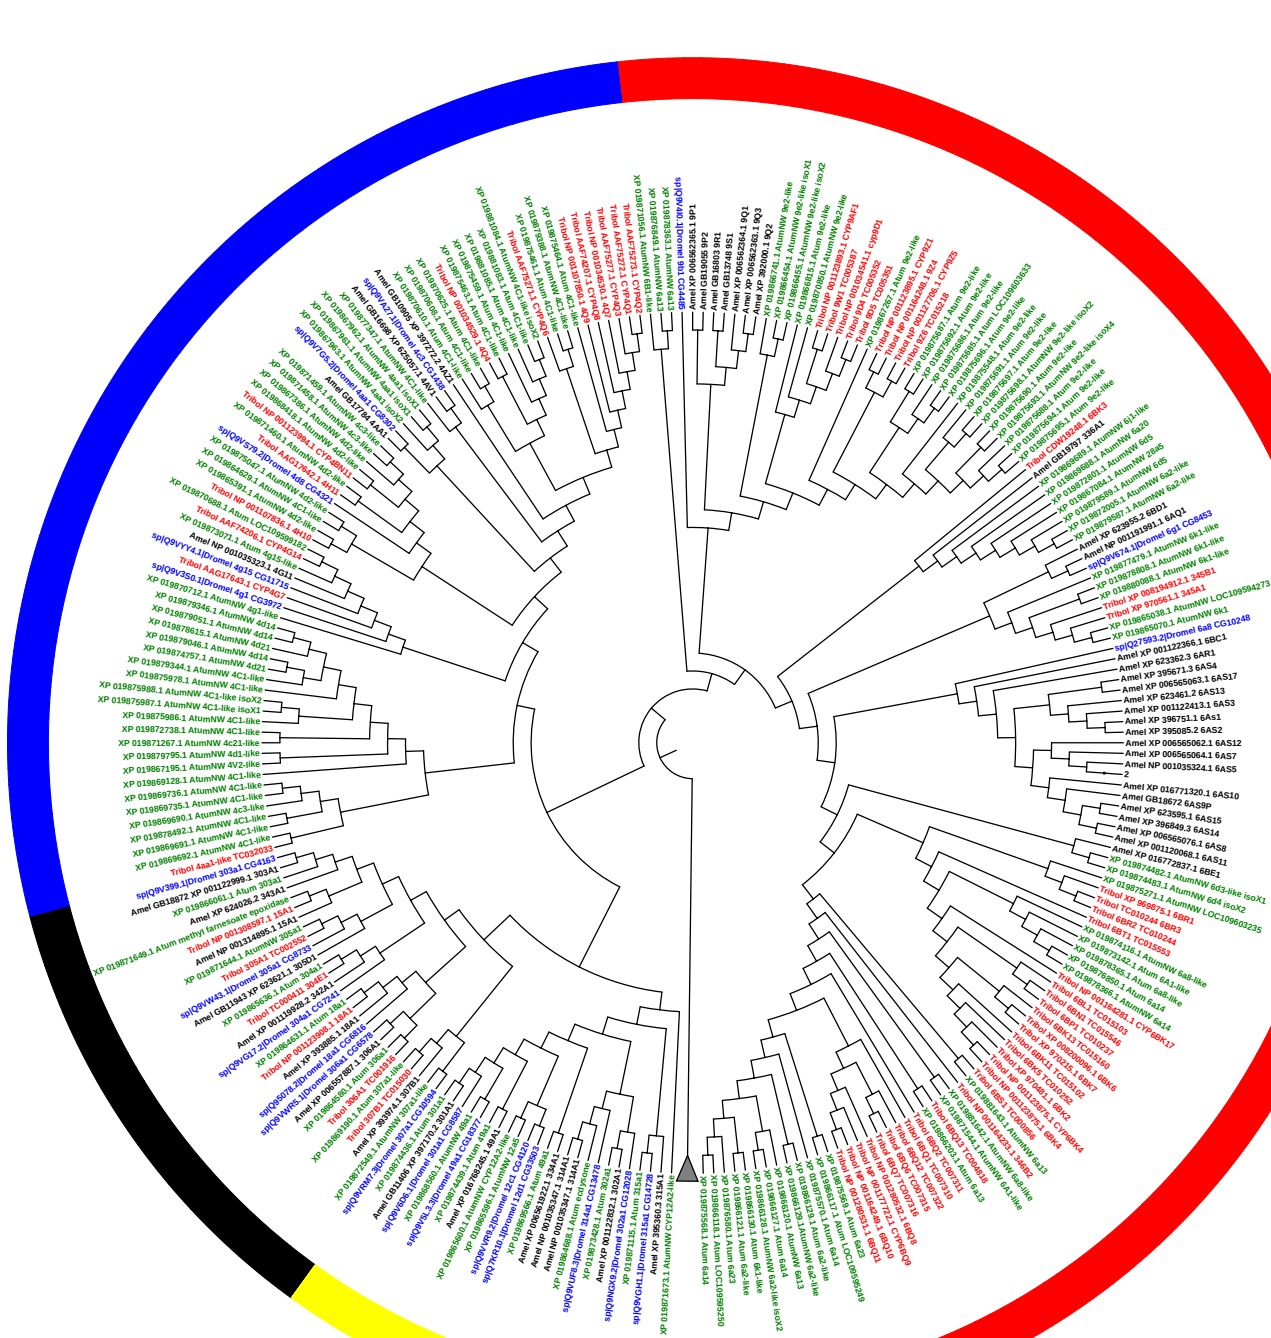

Figure 8



- GST Class**
- Delta
  - Epsilon
  - Omega
  - Sigma
  - Theta
  - Zeta
  - Microsomal
  - Unclassified

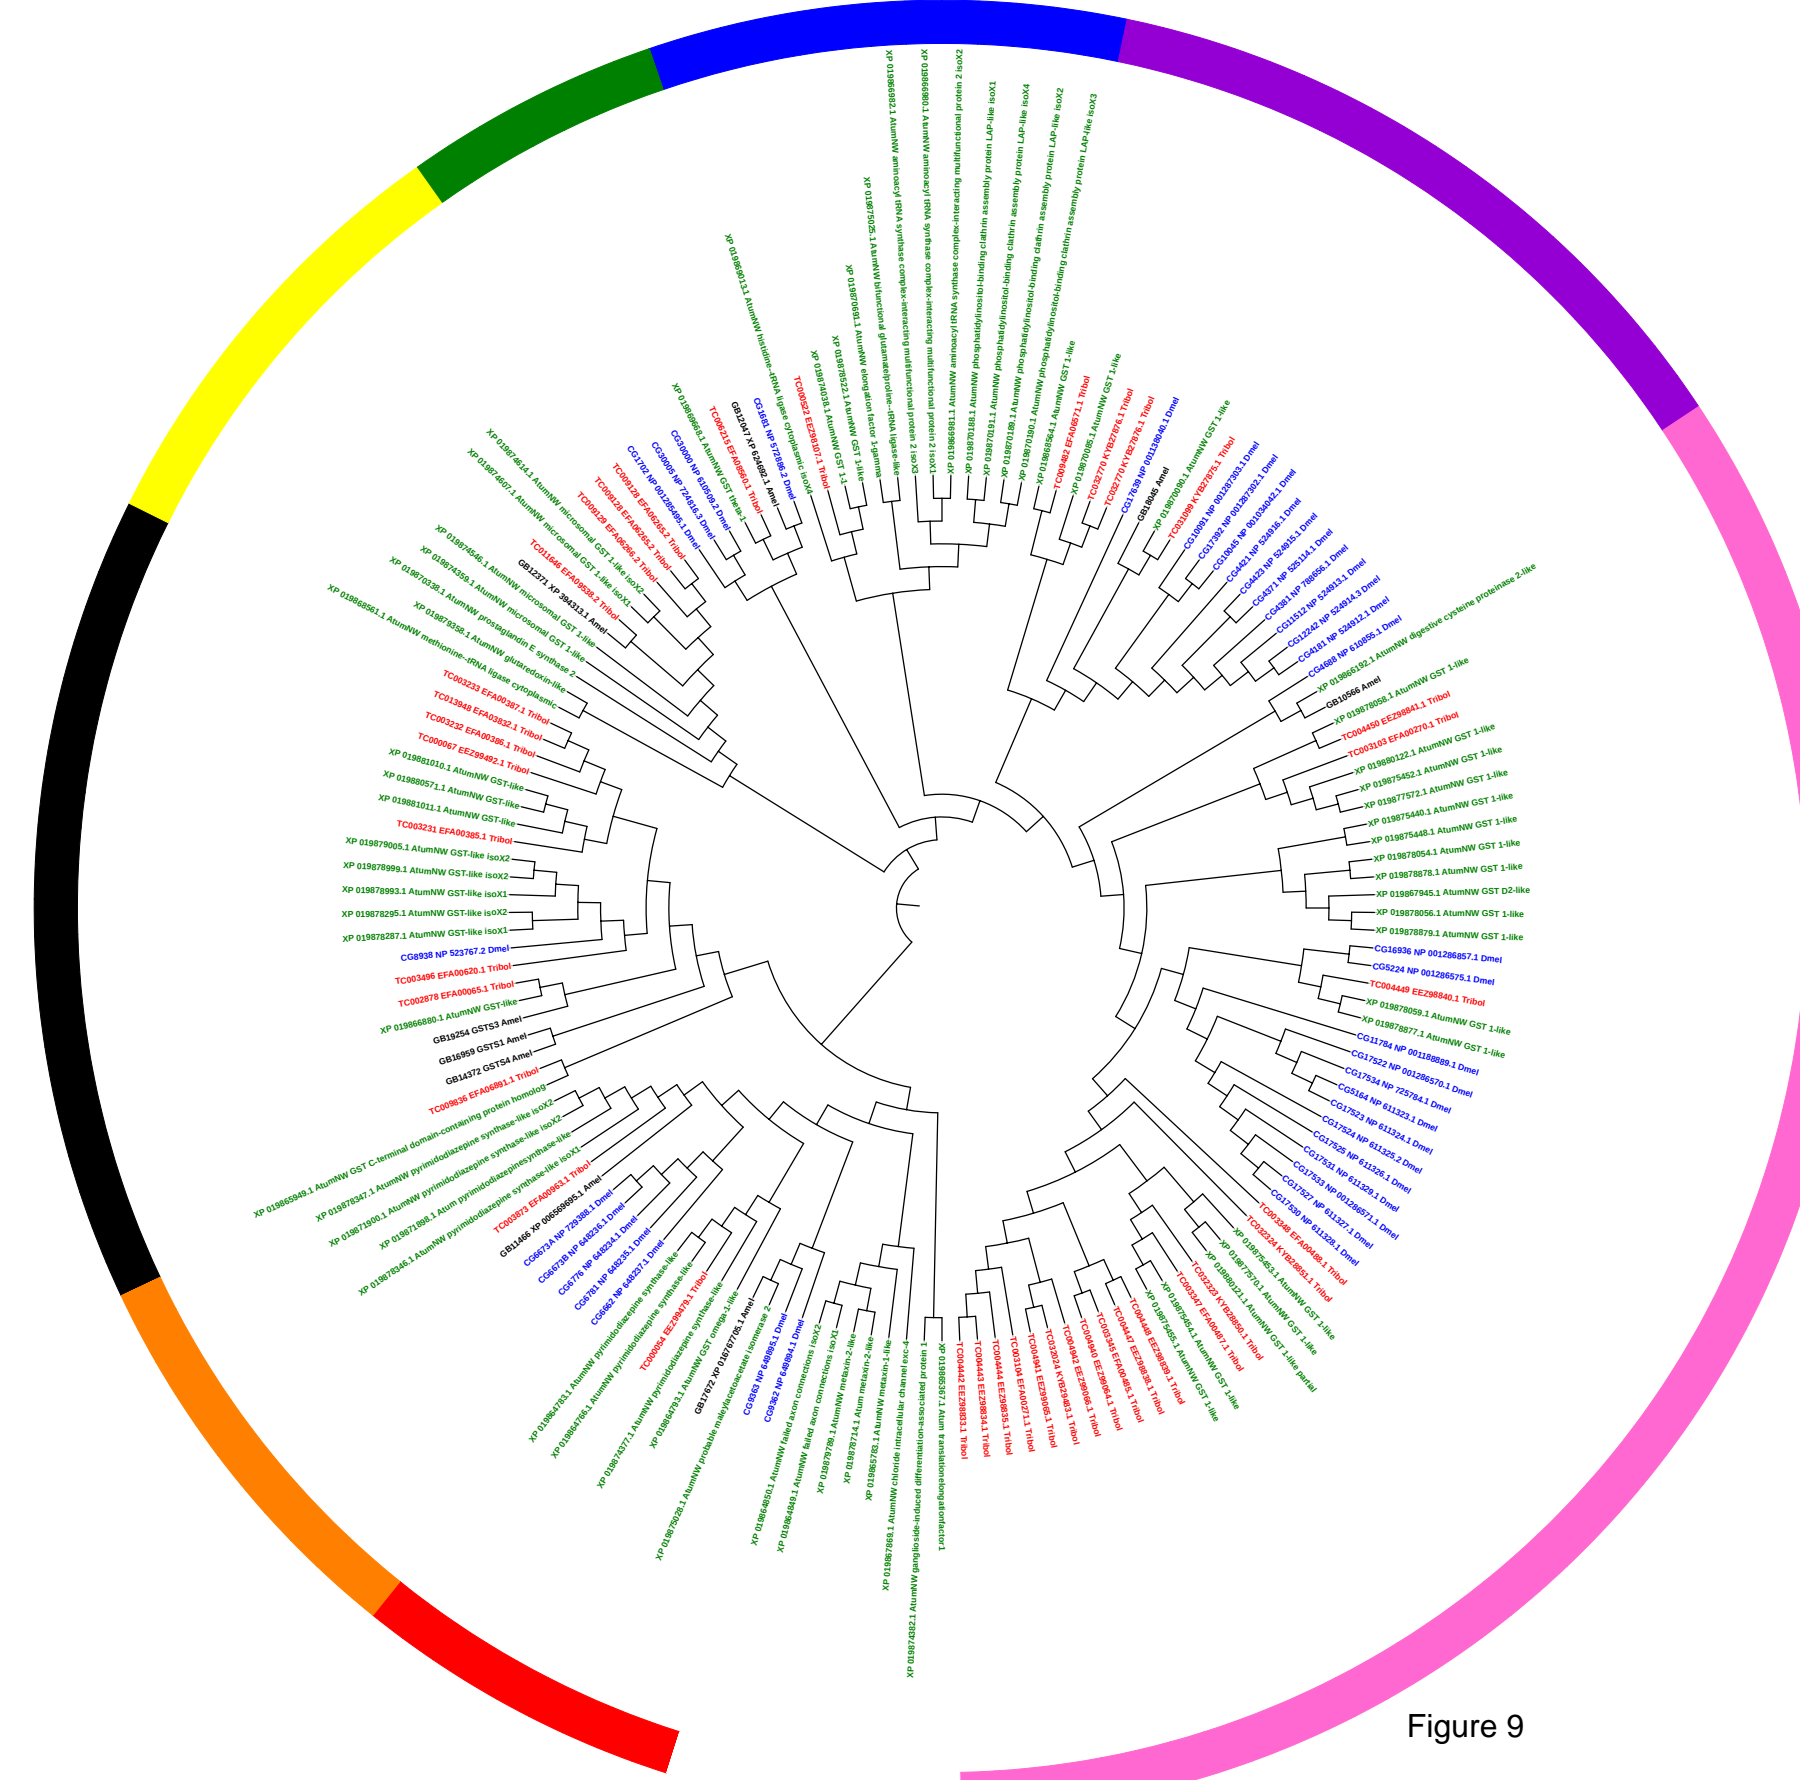

Figure 9

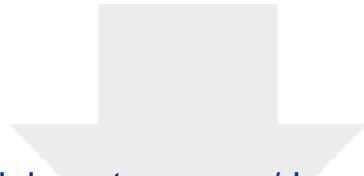

Click here to access/download  
**Supplementary Material**  
SupplementalFile3domains.xlsx

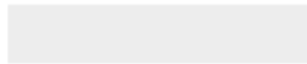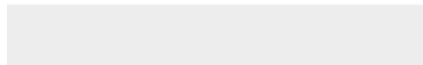

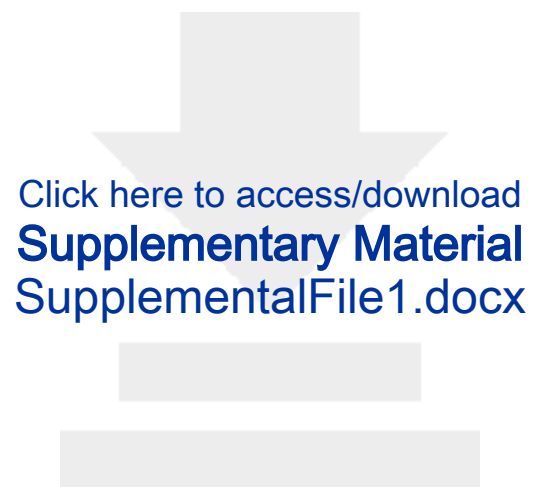

Click here to access/download  
**Supplementary Material**  
SupplementalFile1.docx

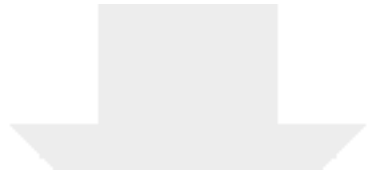

Click here to access/download  
**Supplementary Material**  
SupplementalFile2IDs.xlsx

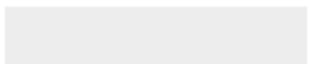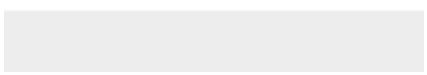

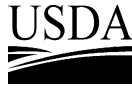

United States Department of Agriculture

Research, Education, and Economics  
Agricultural Research Service

Editorial Board and Managing Editors  
*Gigascience*

Sept 22, 2018

Dear Editors,

We are very happy to hear that our manuscript ""Genome of the small hive beetle (*Aethina tumida*, Coleoptera: Nitidulidae), a worldwide parasite of social bee colonies, provides insights into detoxification and herbivory" (GIGA-D-18-00144R1) is suitable for *Gigascience* pending minor revisions. We have made the suggested changes from the reviewers as below and also have updated numerous references and made minor edits throughout. We feel the figures and supplemental files (methods and figures) remain appropriate.

We are very excited to have a contribution to *Gigascience* and feel this genome will be a great contribution to our field and your journal.

Please say if we can provide any further information and we look forward to the next stages.

Reviewer reports:

Reviewer #1: I think they authors did an acceptable job addressing my comments. I only have further minor editorial comments.

Comments:

I do not see where overall gene compliment completeness is mentioned in the abstract.

Minor Comments:

Abstract - Introduction of abbreviation before Latin name sees odd.

**We corrected this in the first line of the introduction so that now both mentions of ATUMI follow the latin name that generated this acronym**

"... size of the ATUMI genome assembly [is] larger ..."

**fixed**

Orthologous group numbers need commas to be consistent with rest of paper.

**fixed**

**Reference 17 - The potato beetle genome is now published.**

fixed

Reviewer #2: The authors have addressed most comments raised by the reviewers. The manuscript has been significantly improved. However, the authors did not revise the manuscript

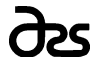

Bee Research Laboratory  
Building 476, Beltsville, MD 20705

An Equal Opportunity Employer

as what they said in the replies to the comments. Here are two examples. 1) the authors mentioned "we have added our BUSCO/completeness parameters as part of the abstract, we feel the captured genes in this analysis are complete and allow for the arguments for gene loss, duplication, etc.". However, I did not find it in the revised abstract. 2) In reply to "Line 164. 2444 needs a comma to be consistent with other number in manuscript." the authors said "fixed". However, no comma found in 2444 and other figures in the revised manuscript (Page 8 line 4 - line 10). The authors should carefully revise the manuscript.

**Hi we are sorry, we had corrected most of the commas in numbers but missed some, and should be complete now, as is the addition of BUSCO estimates to the abstract. We have also checked to make sure additional comments were addressed as promised.**

With my best regards,

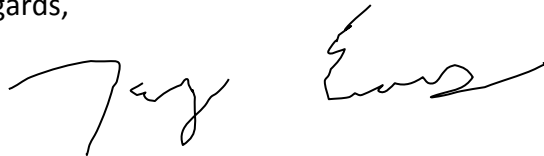A handwritten signature in black ink, appearing to read "Jay Evans". The signature is fluid and cursive, with the first name "Jay" and the last name "Evans" clearly distinguishable.

Jay Evans, PhD  
Research Leader

USDA-ARS Bee Research Lab BARC-East Bldg. 306

Beltsville, MD 20705 [jay.evans@ars.usda.gov](mailto:jay.evans@ars.usda.gov) PH: 301-504-5143 FAX: 301-504-8736

<http://orcid.org/0000-0002-0036-465>
